# Supplementary material for: Building polyfunctional piperidines: a stereoselective strategy of a three-component Mannich reaction inspired by biosynthesis and applications in the synthesis of natural alkaloids (+)-241D; (−)-241D; isosolenopsin A and (−)-epimyrtine
Source: Royal Society of Chemistry journal article supplement (doi:10.1039/c4ra14418j), 2015-01-01

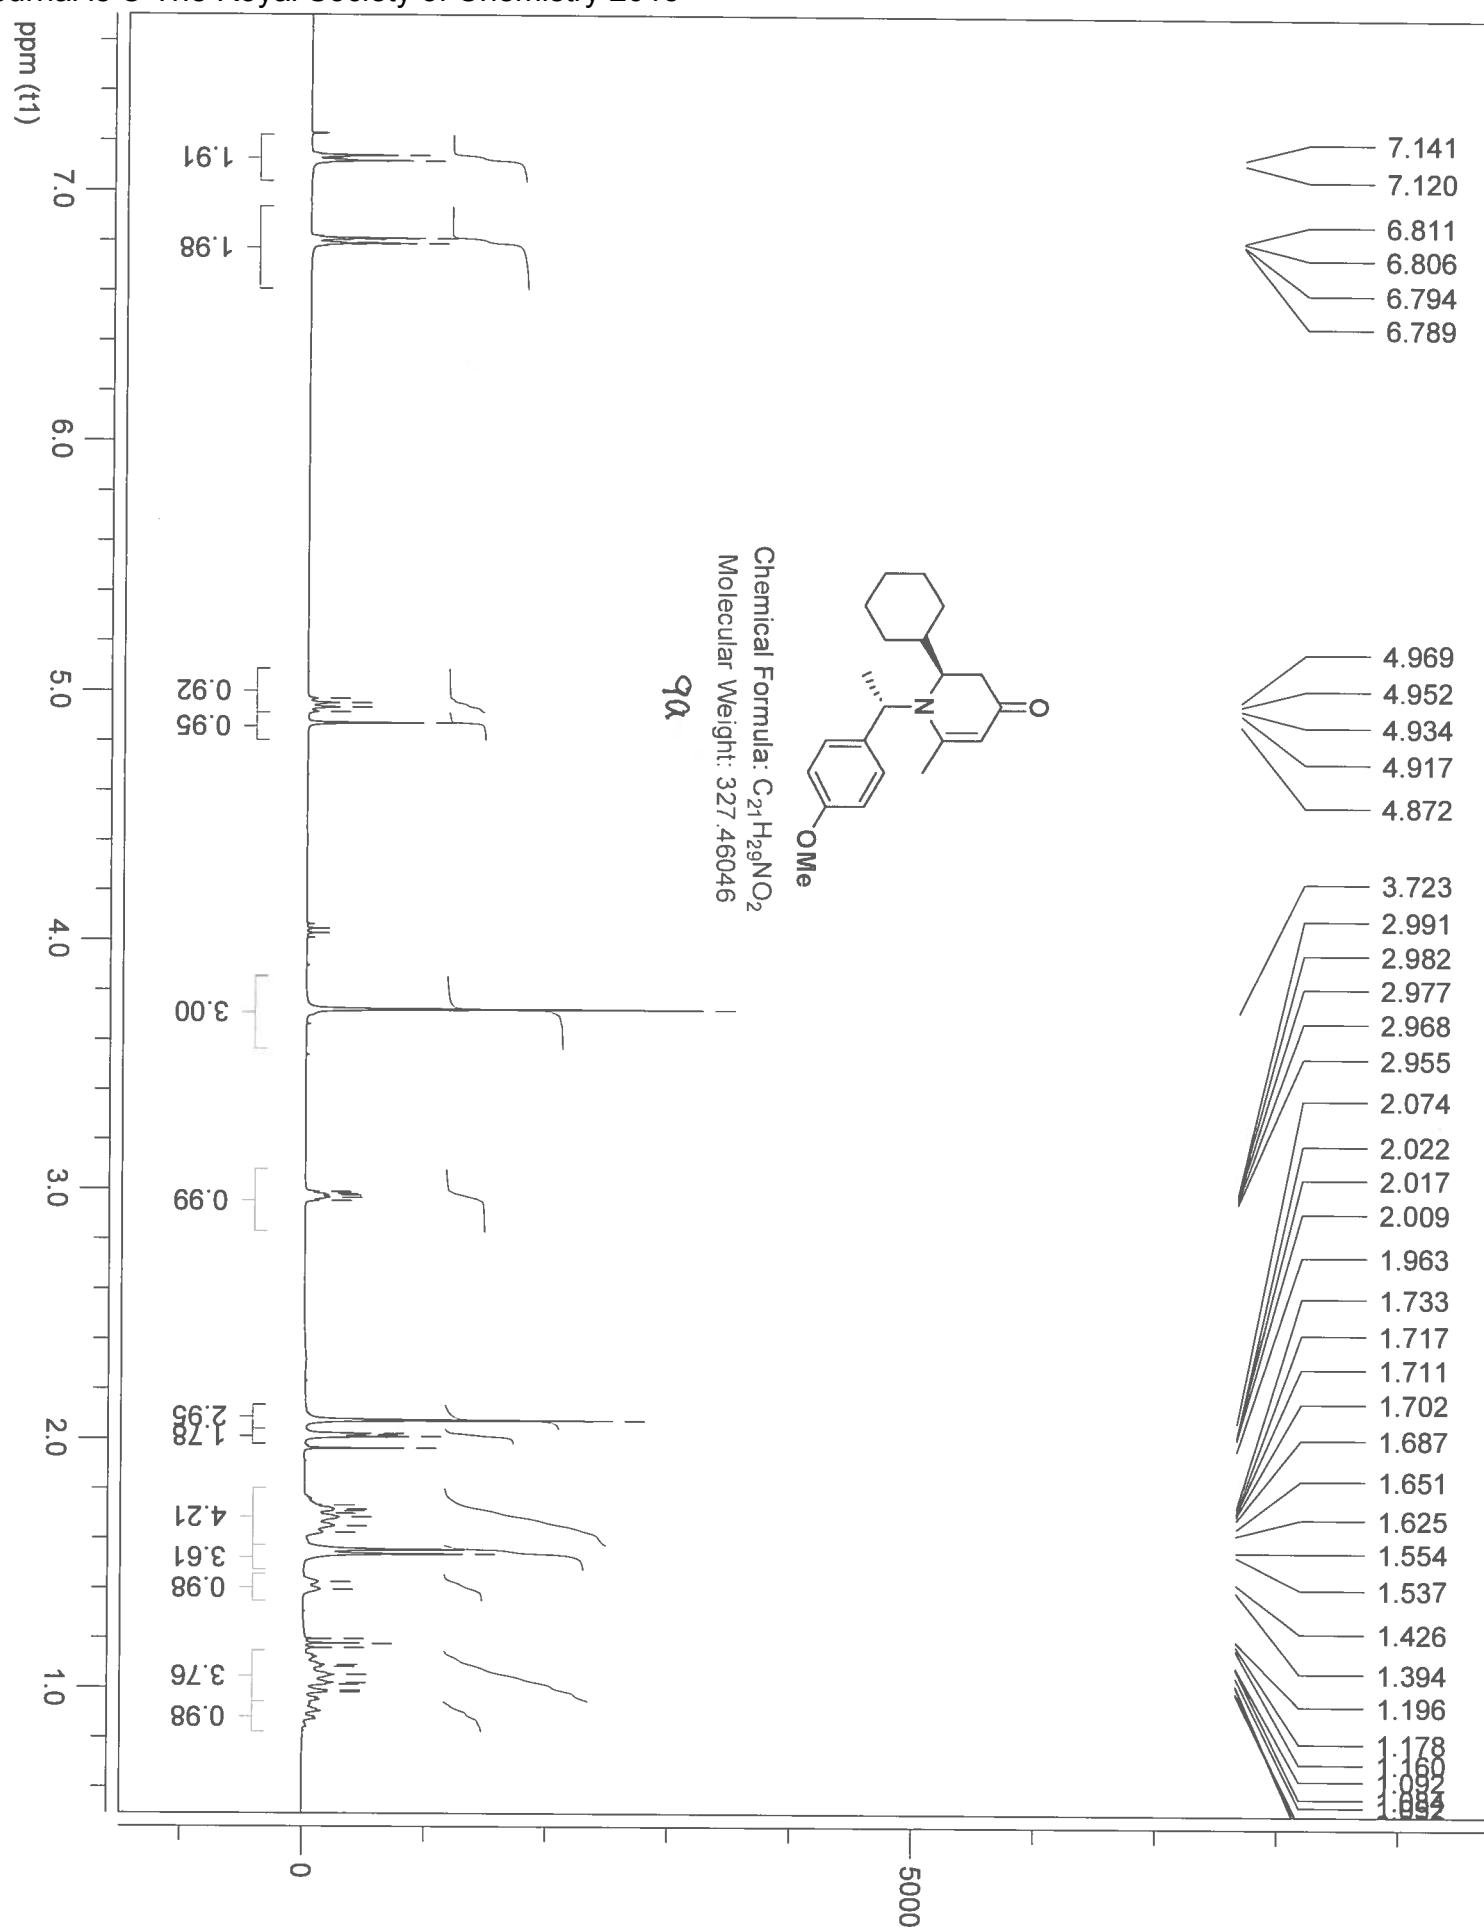

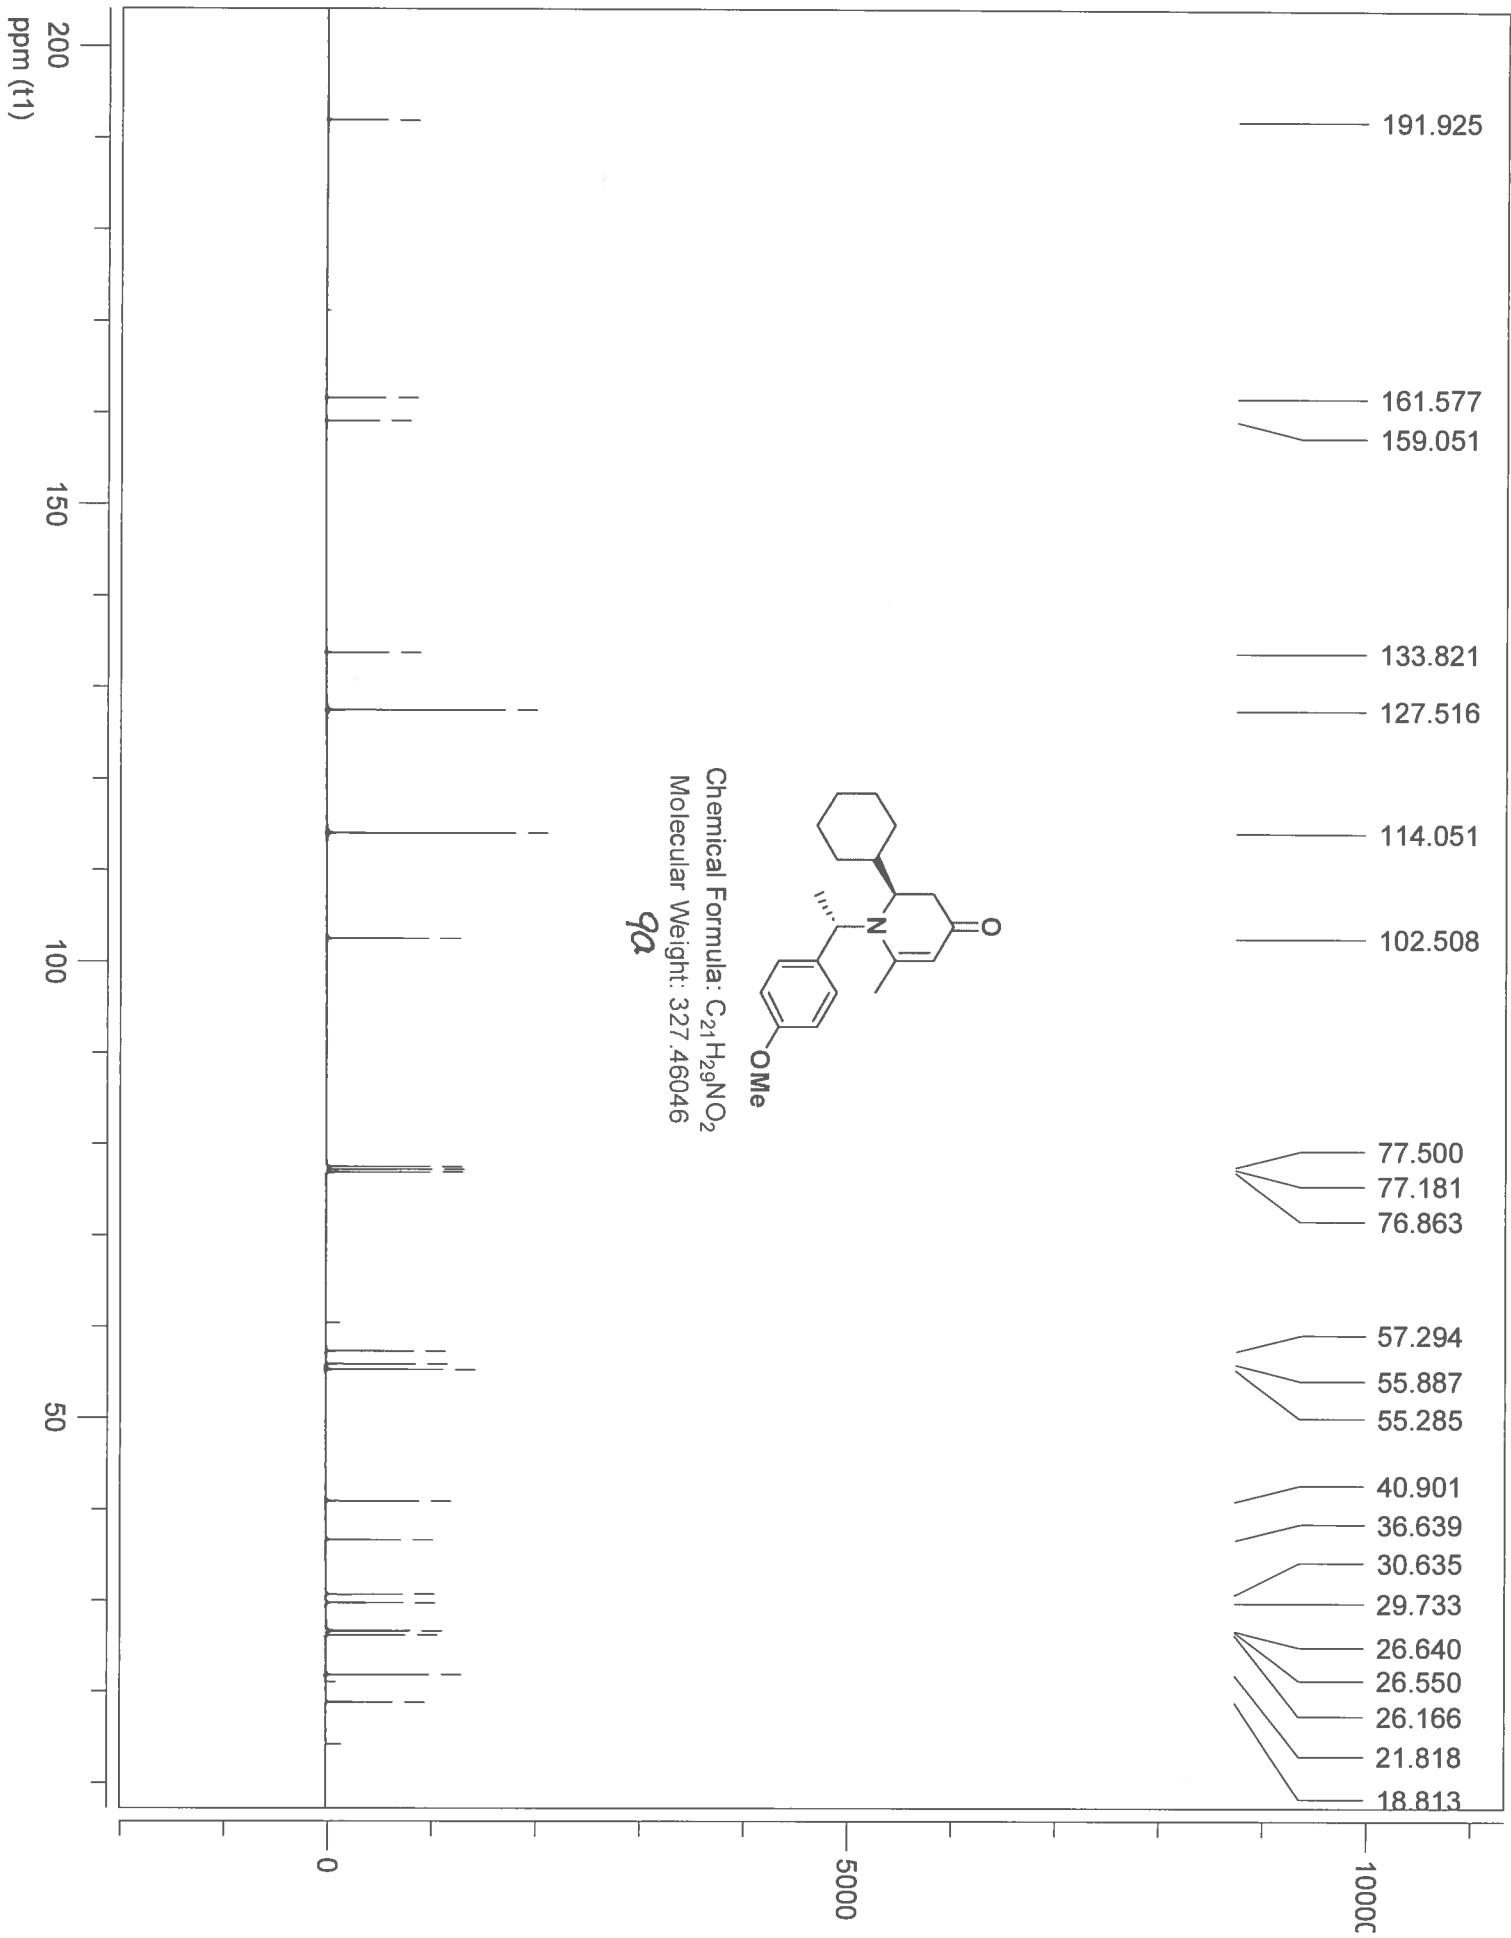

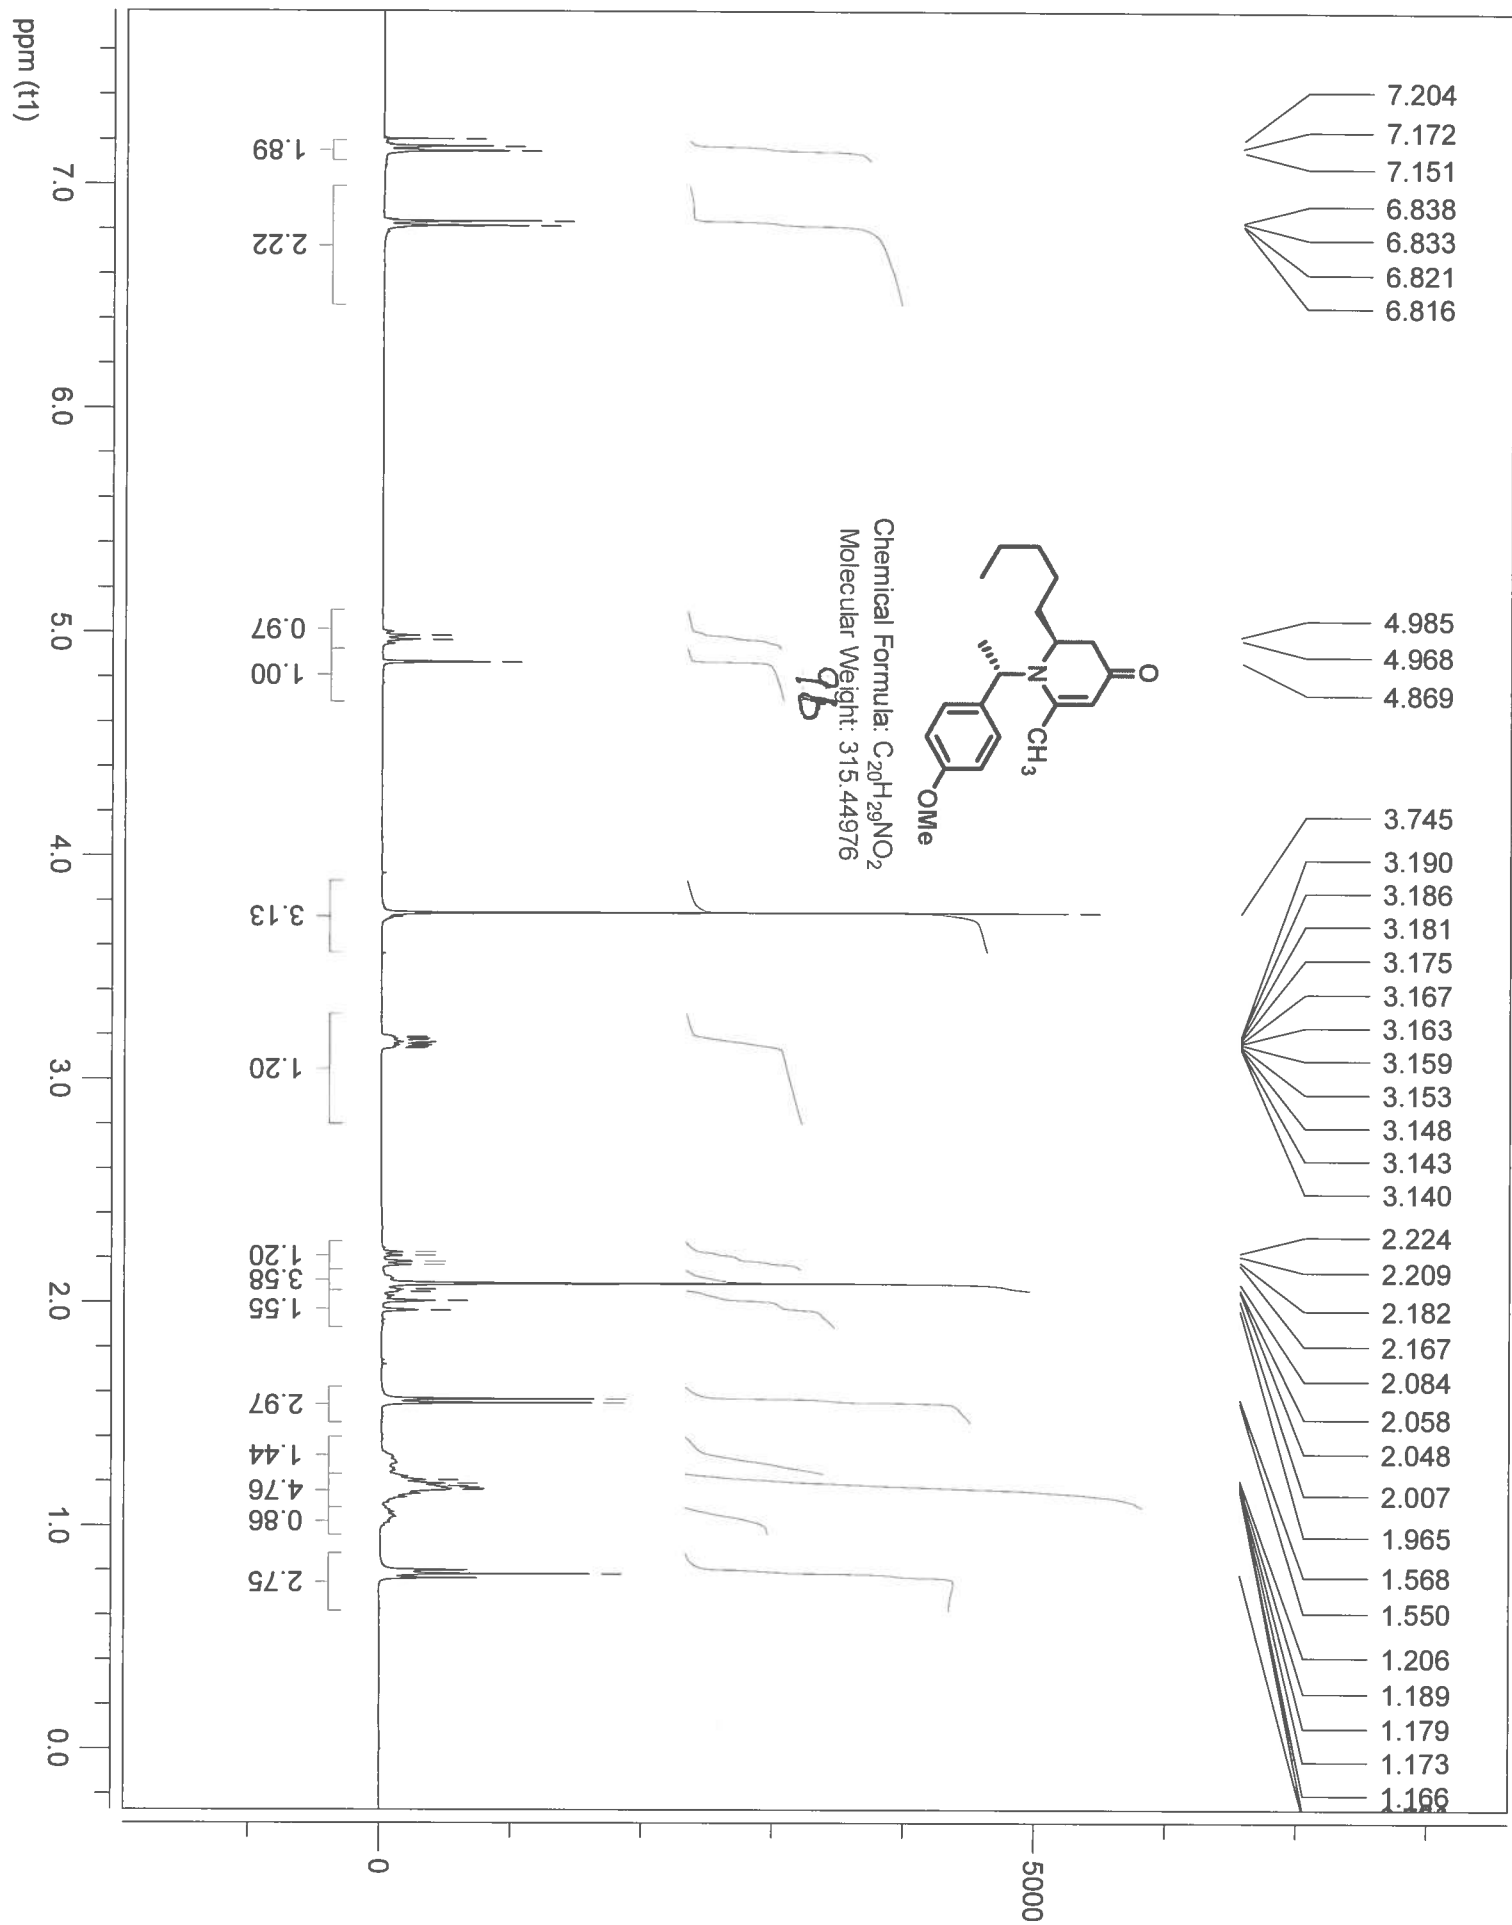

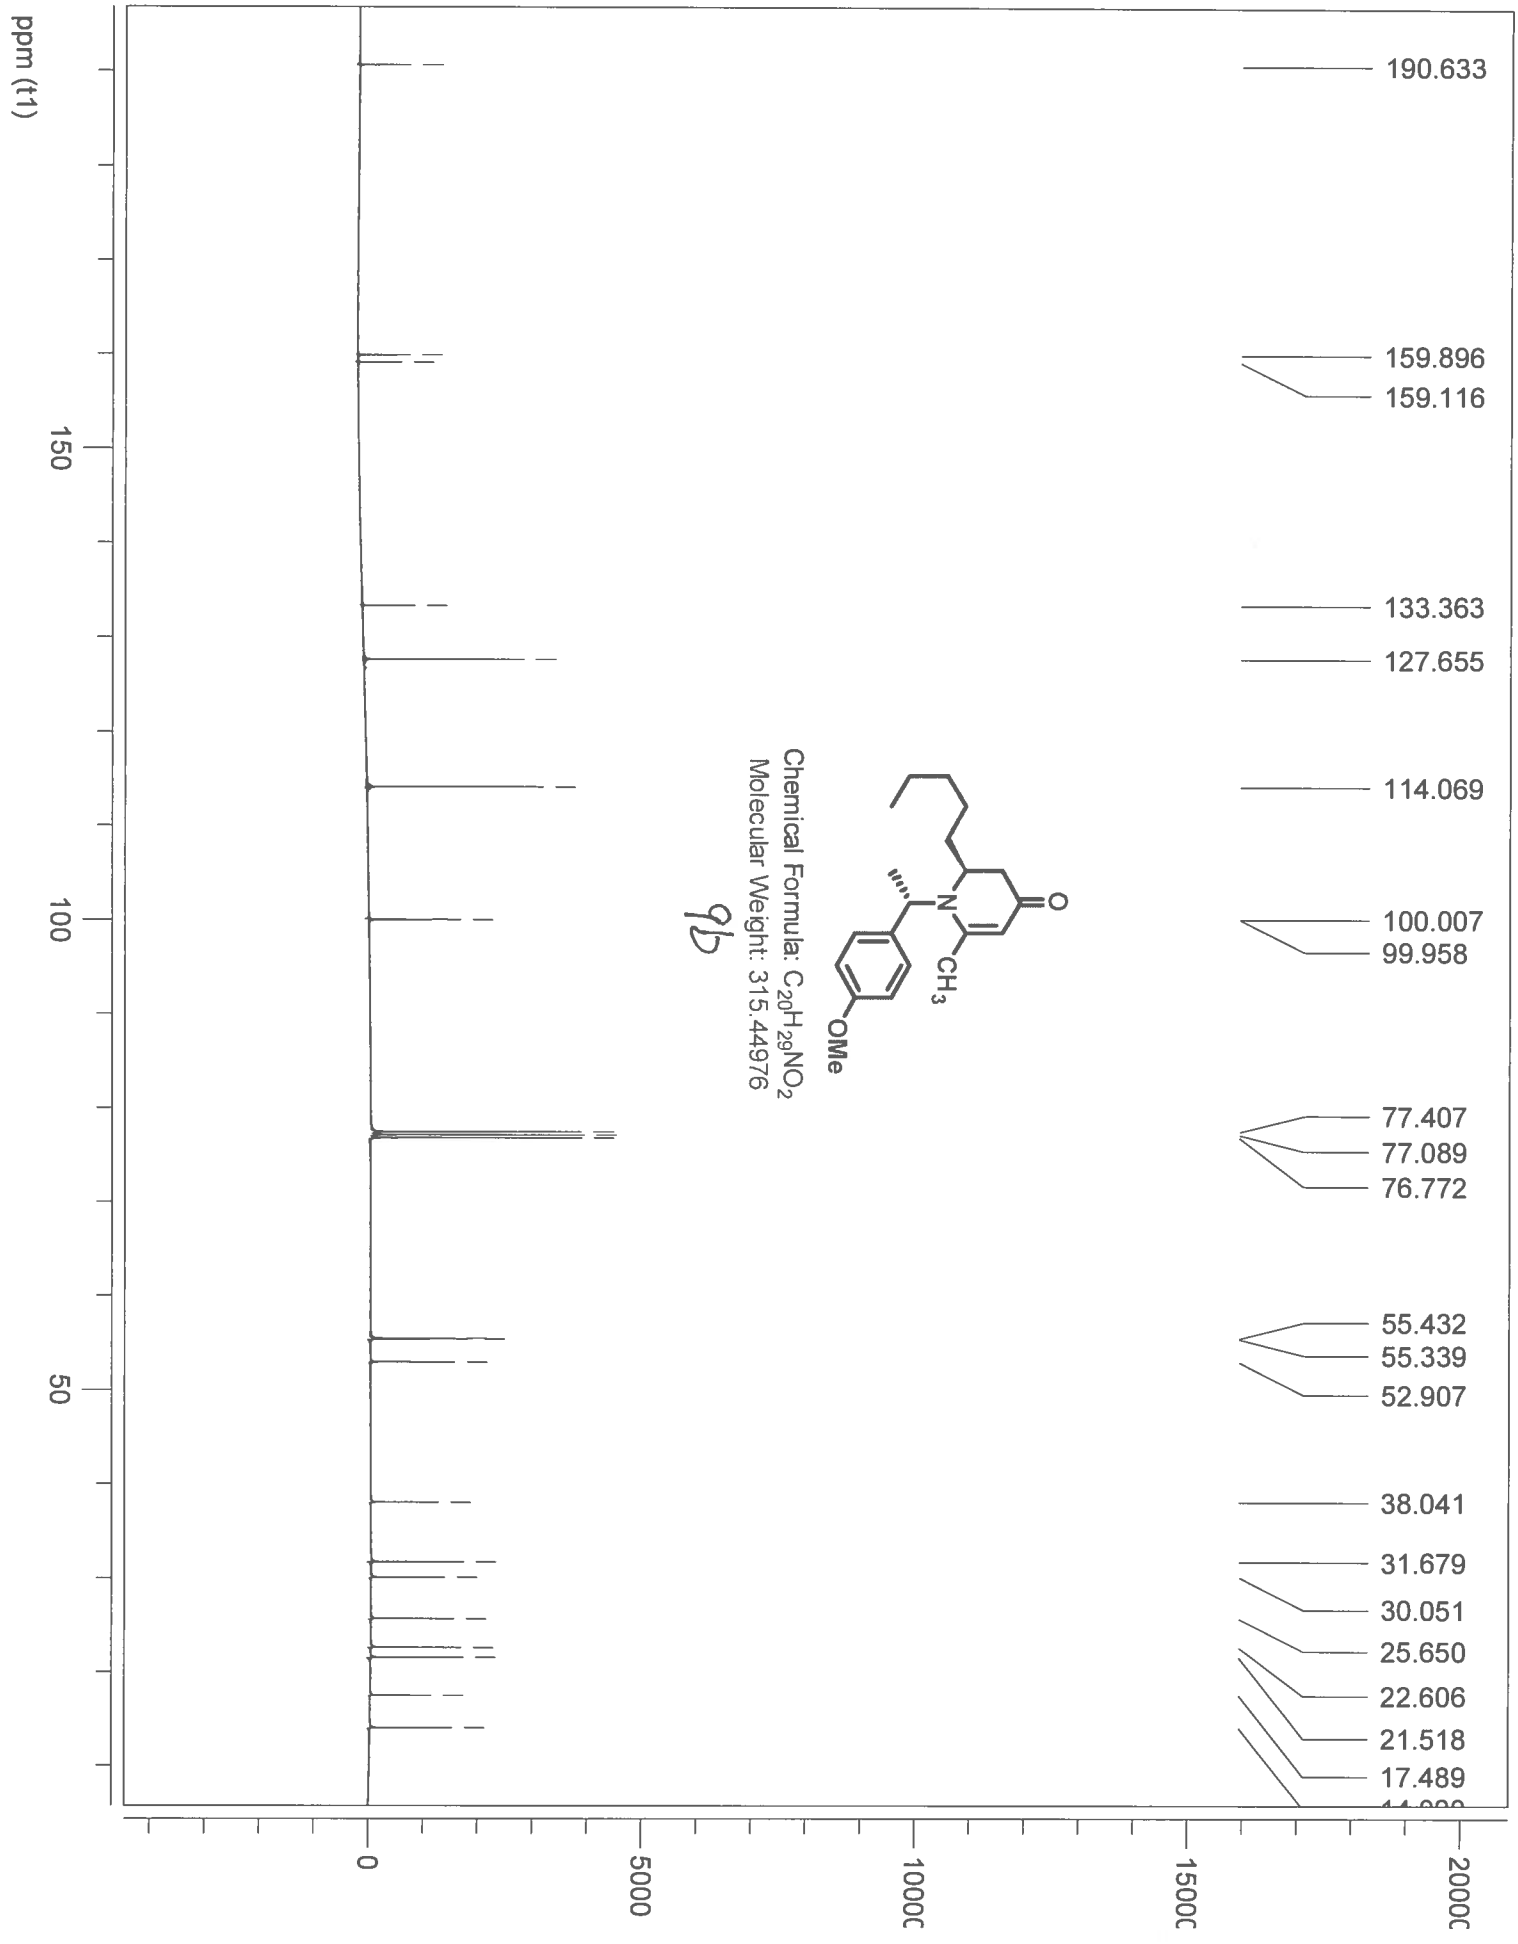

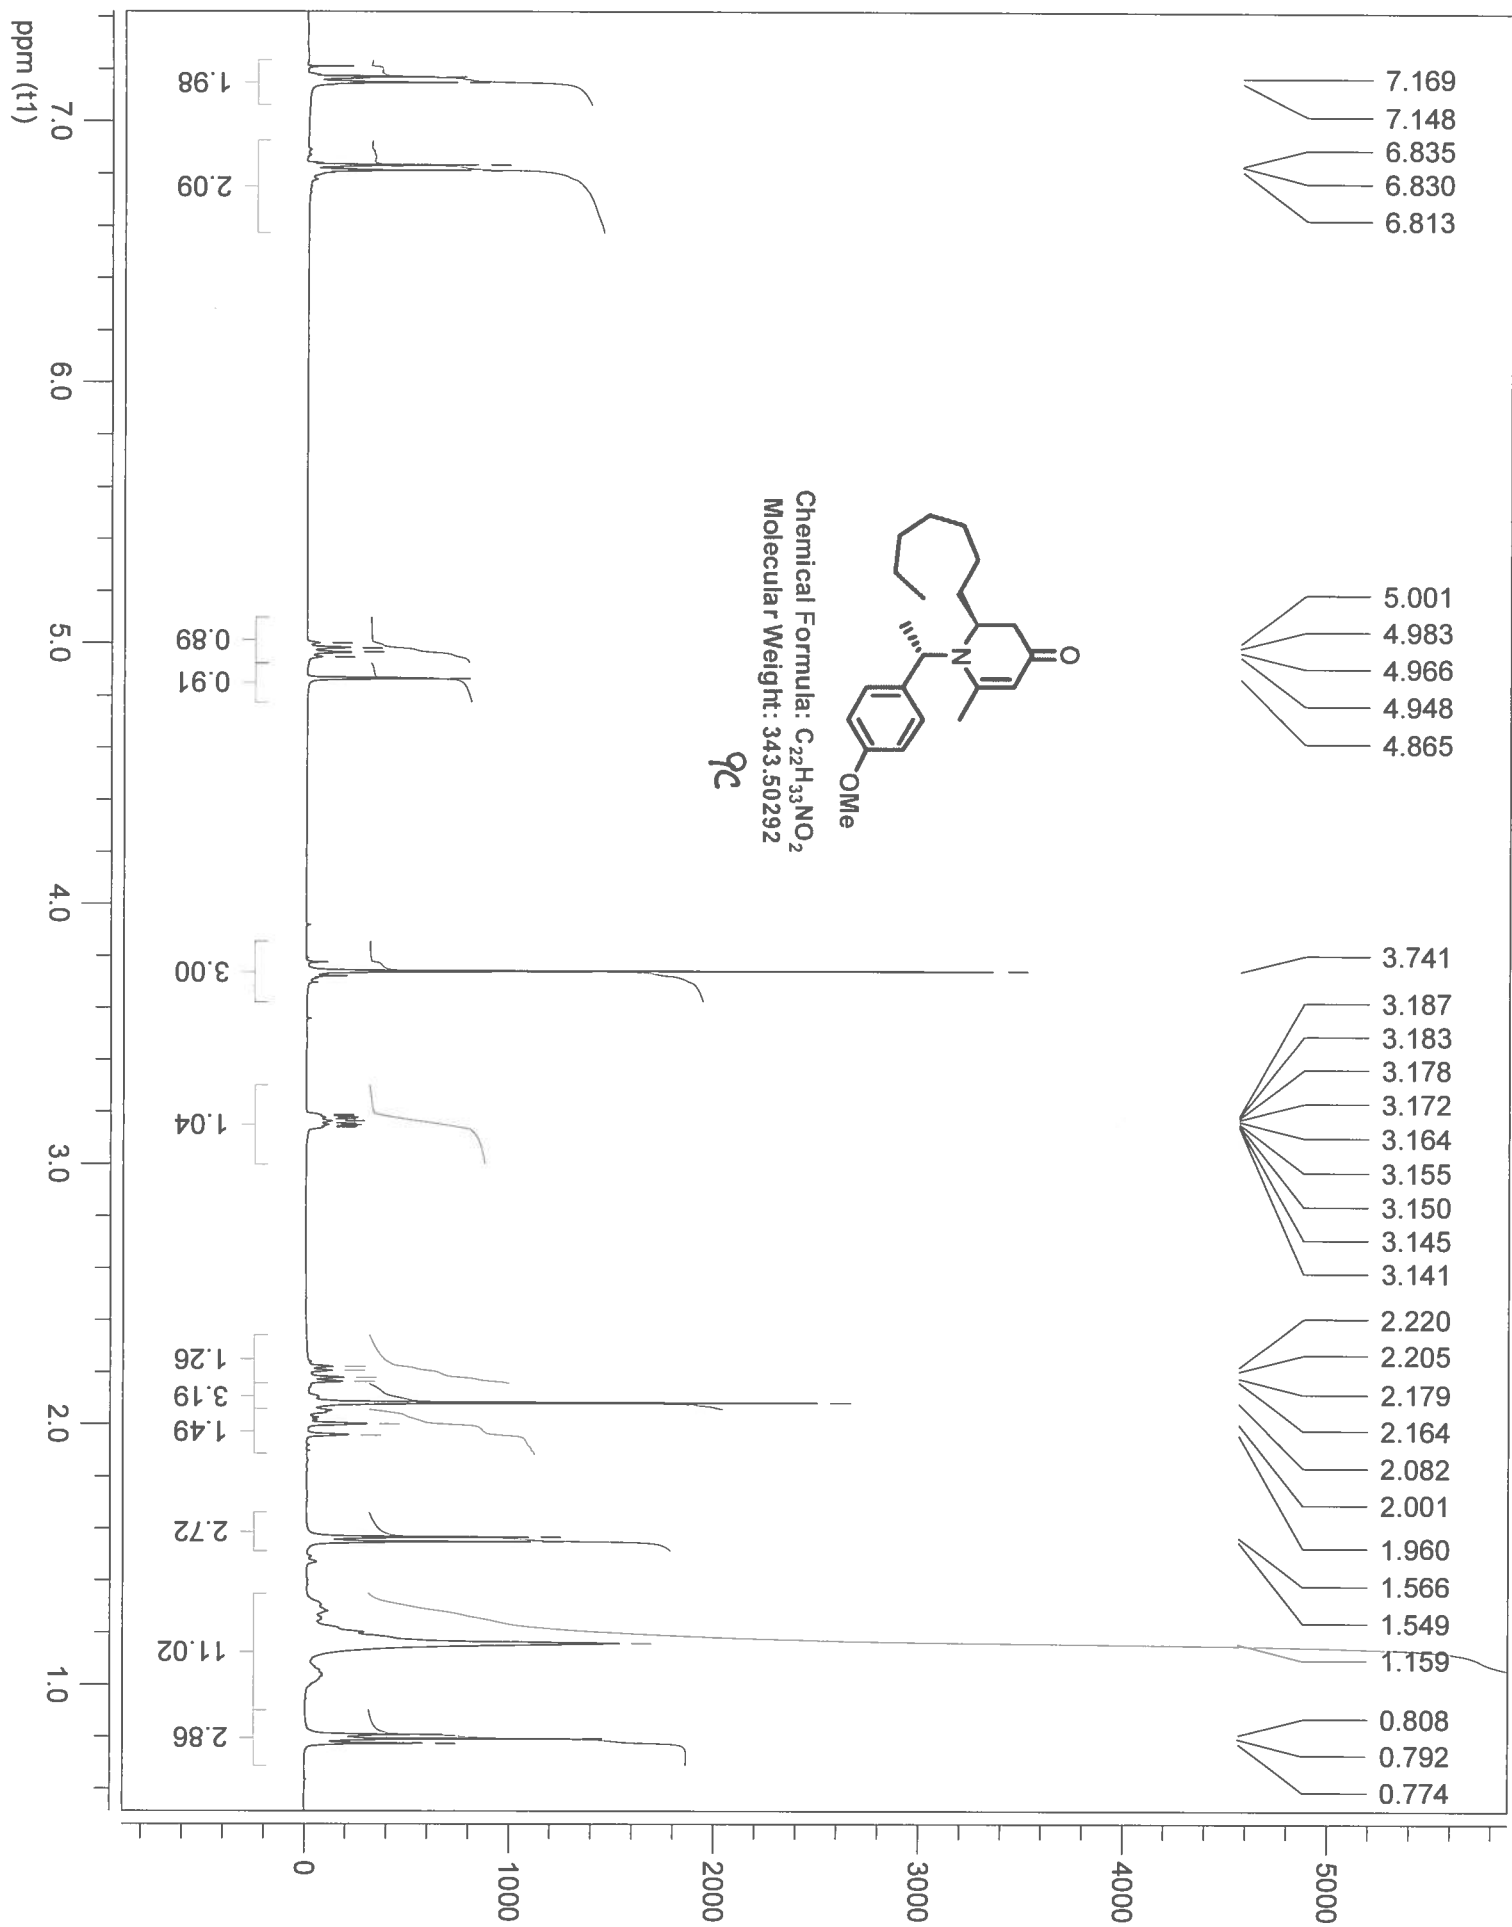

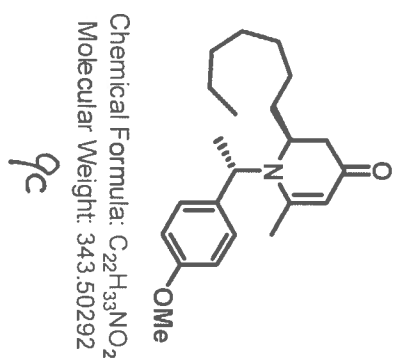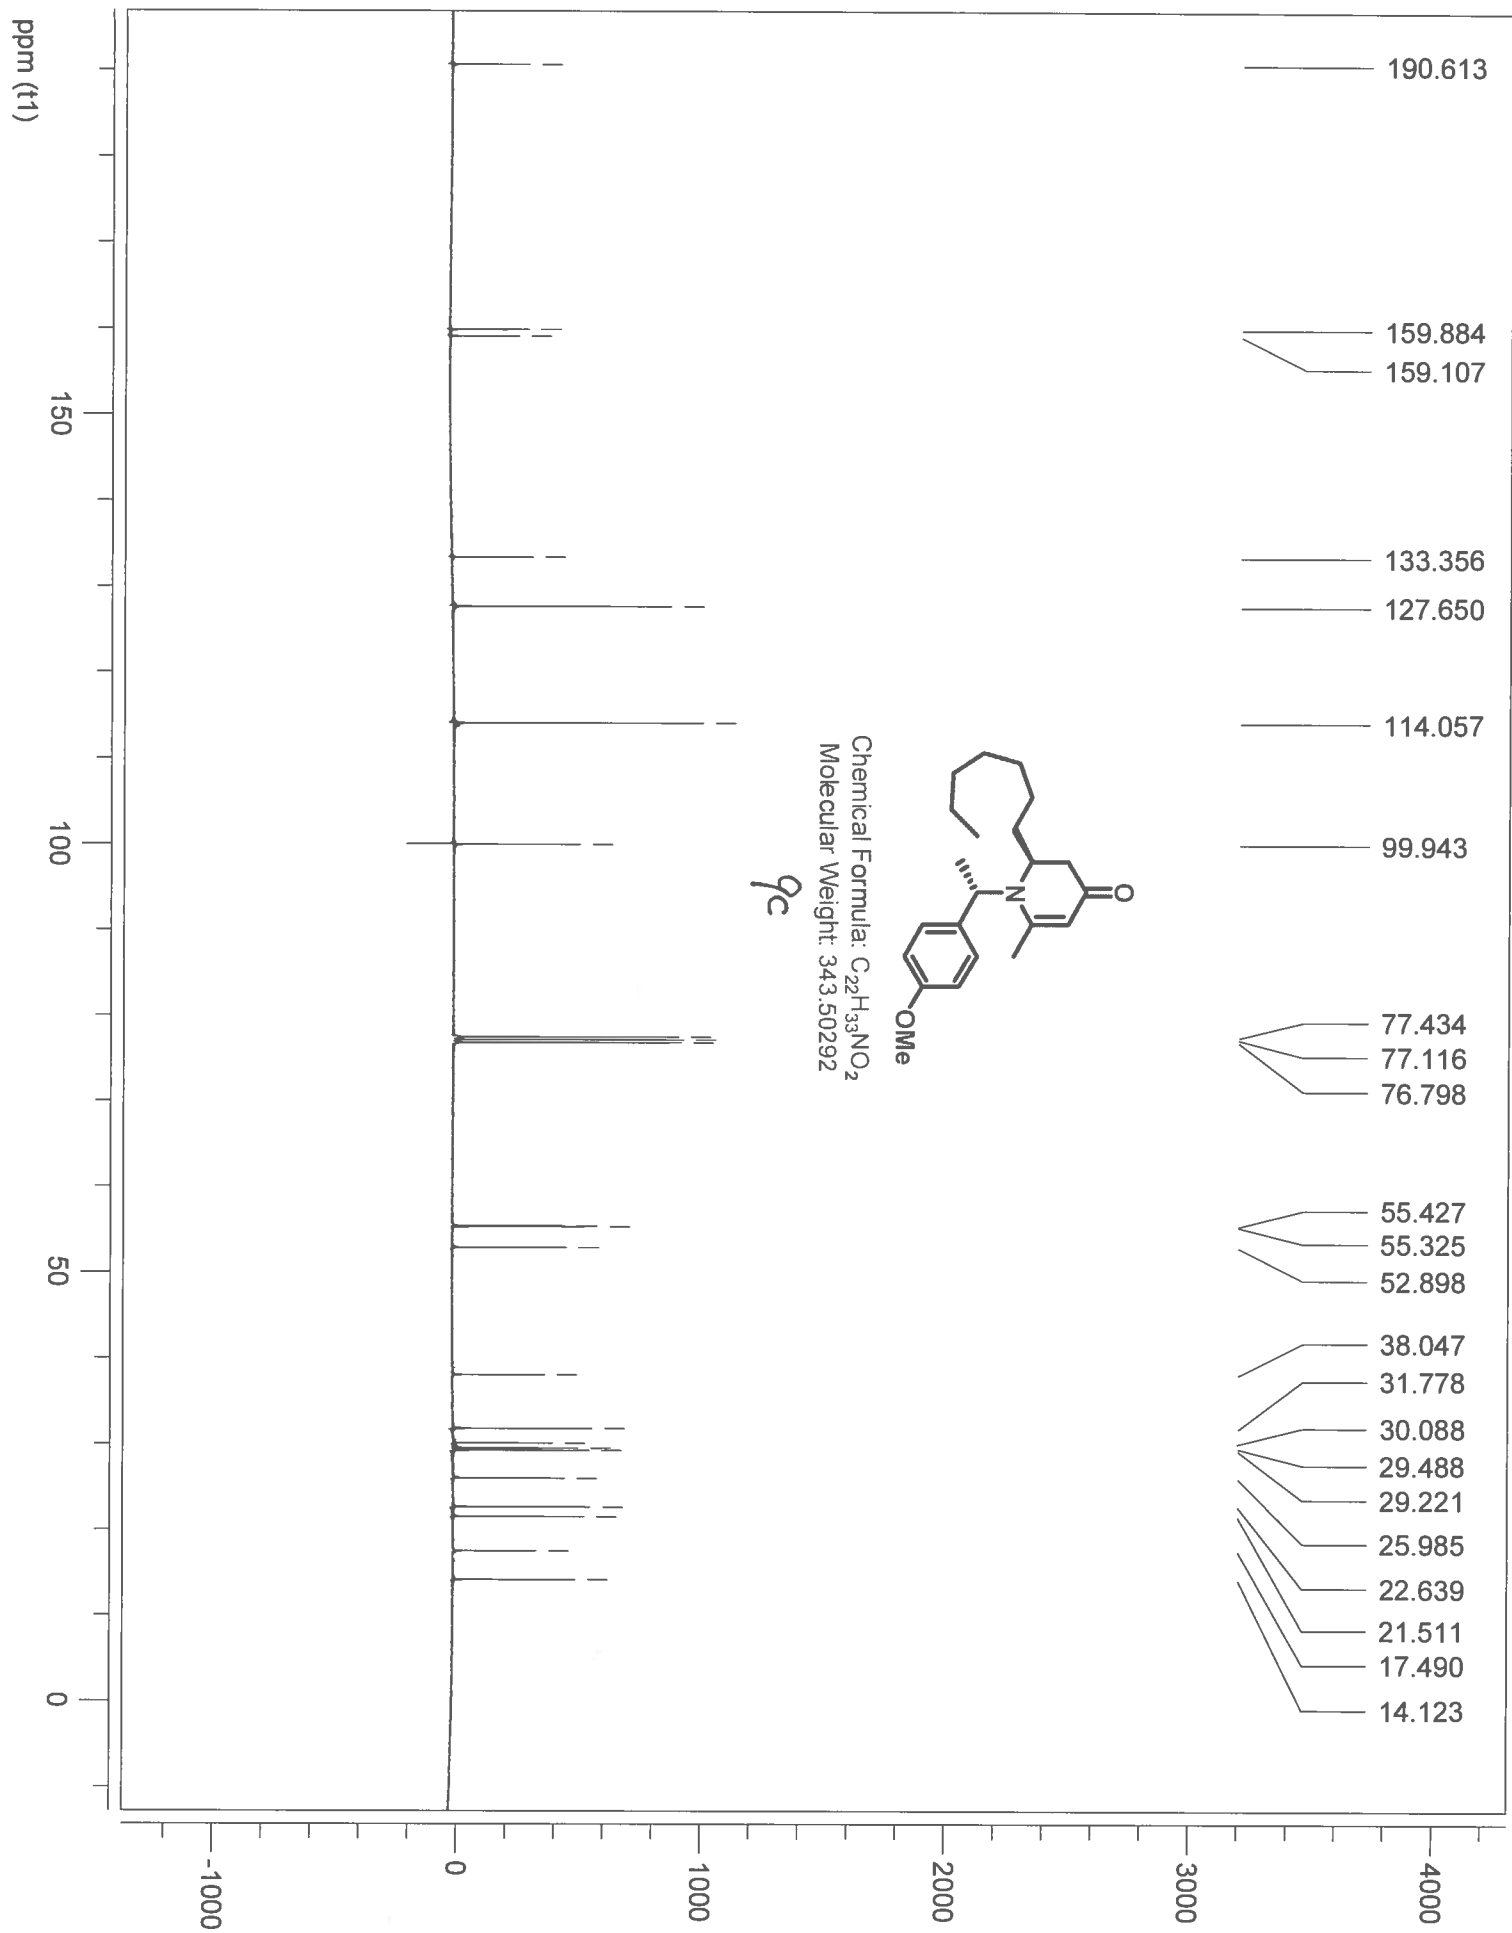

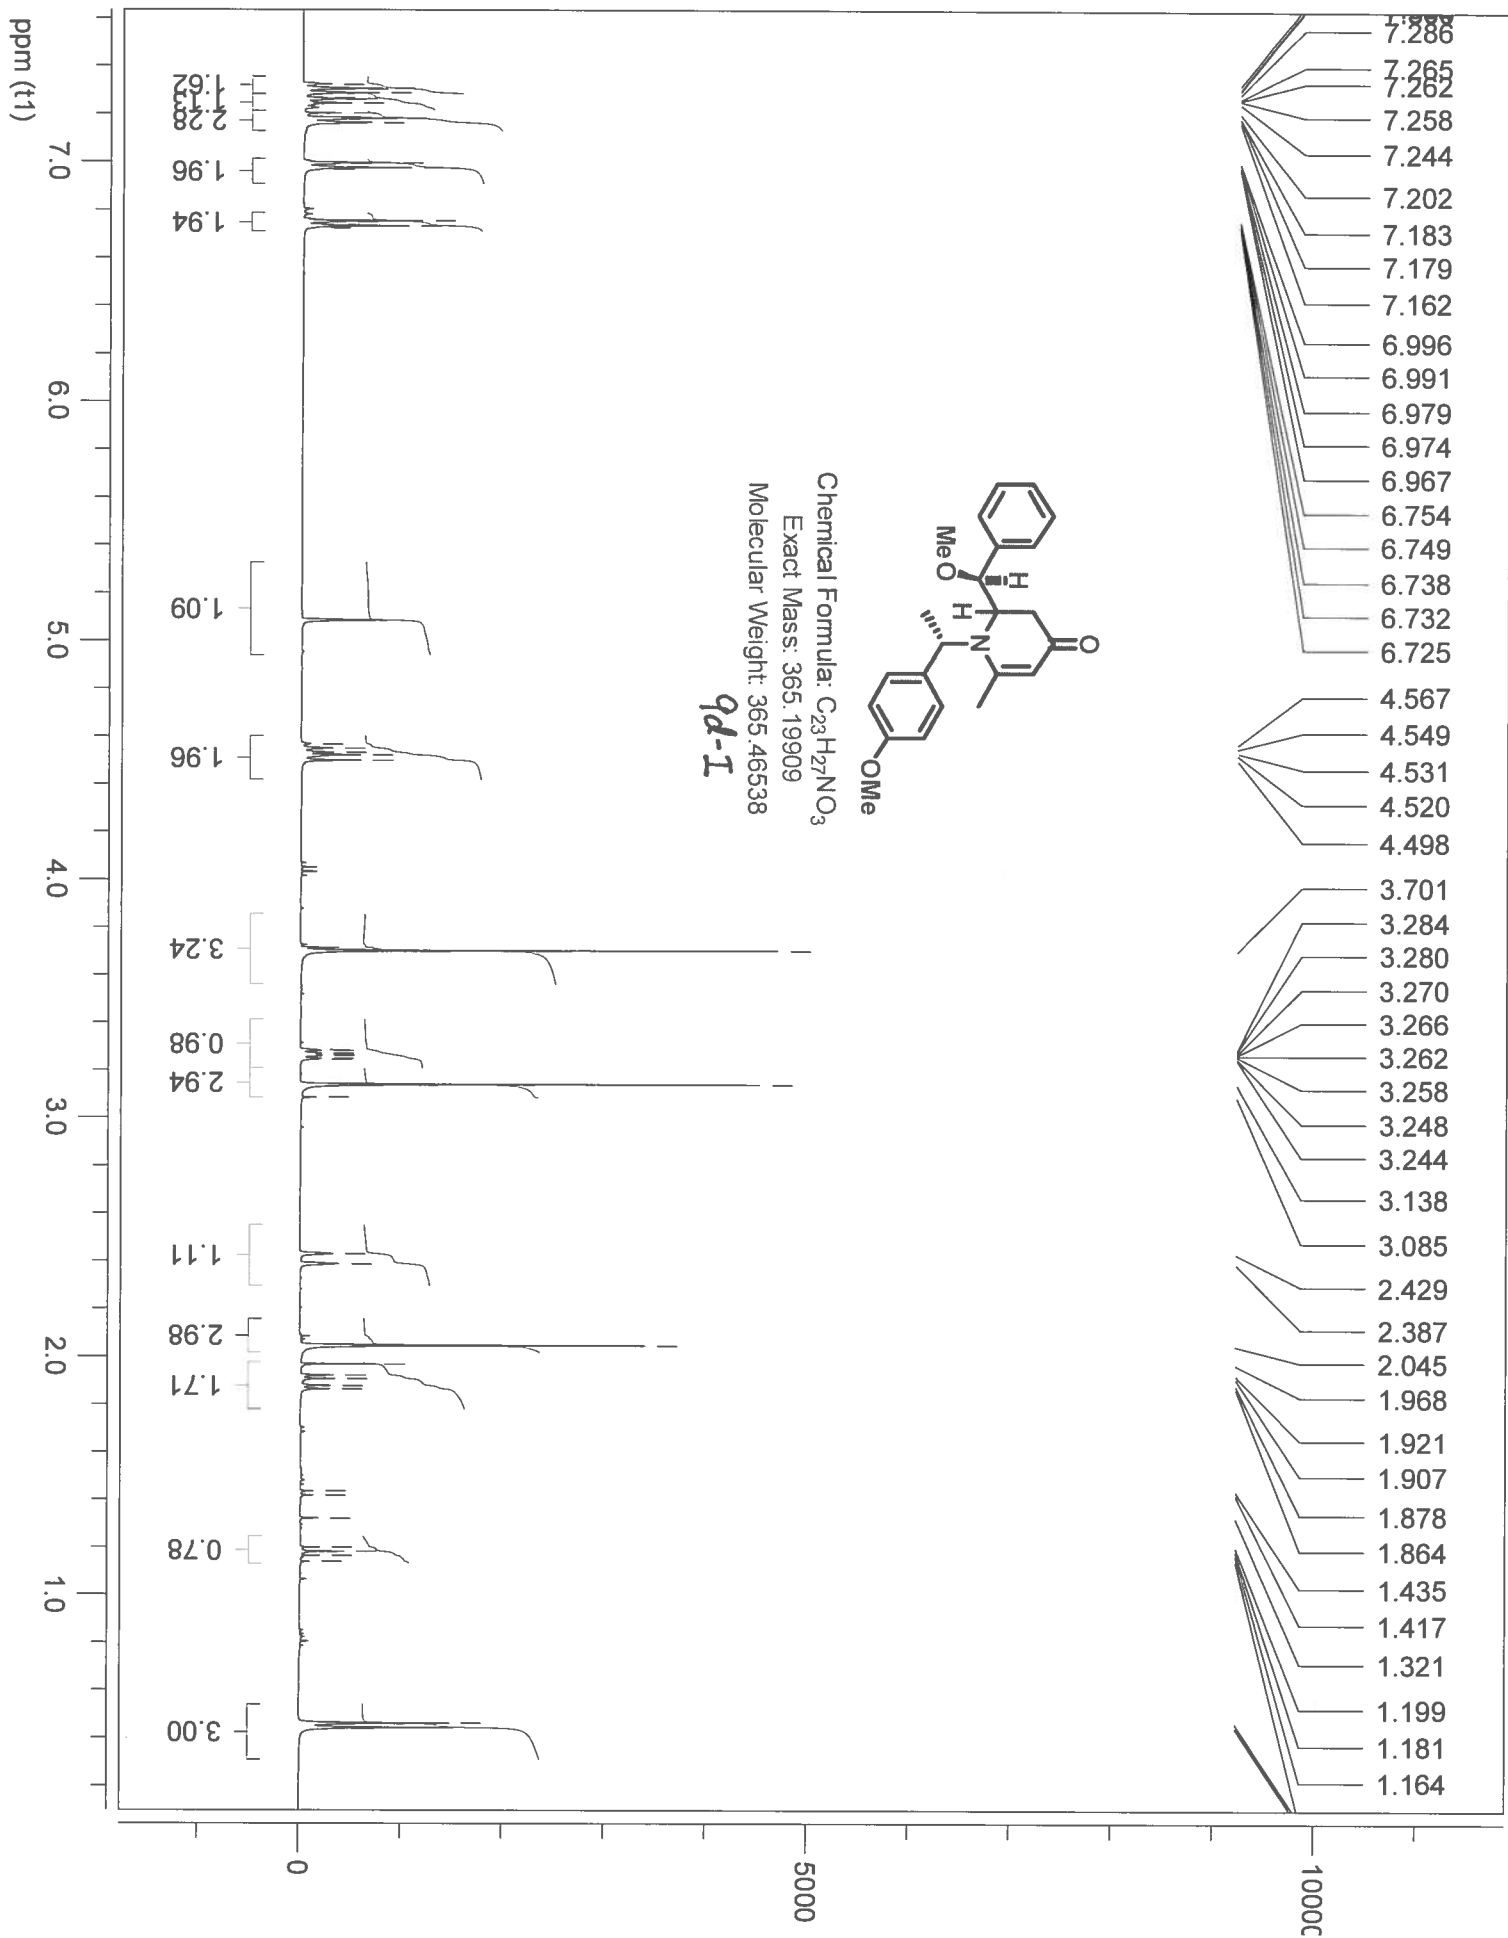

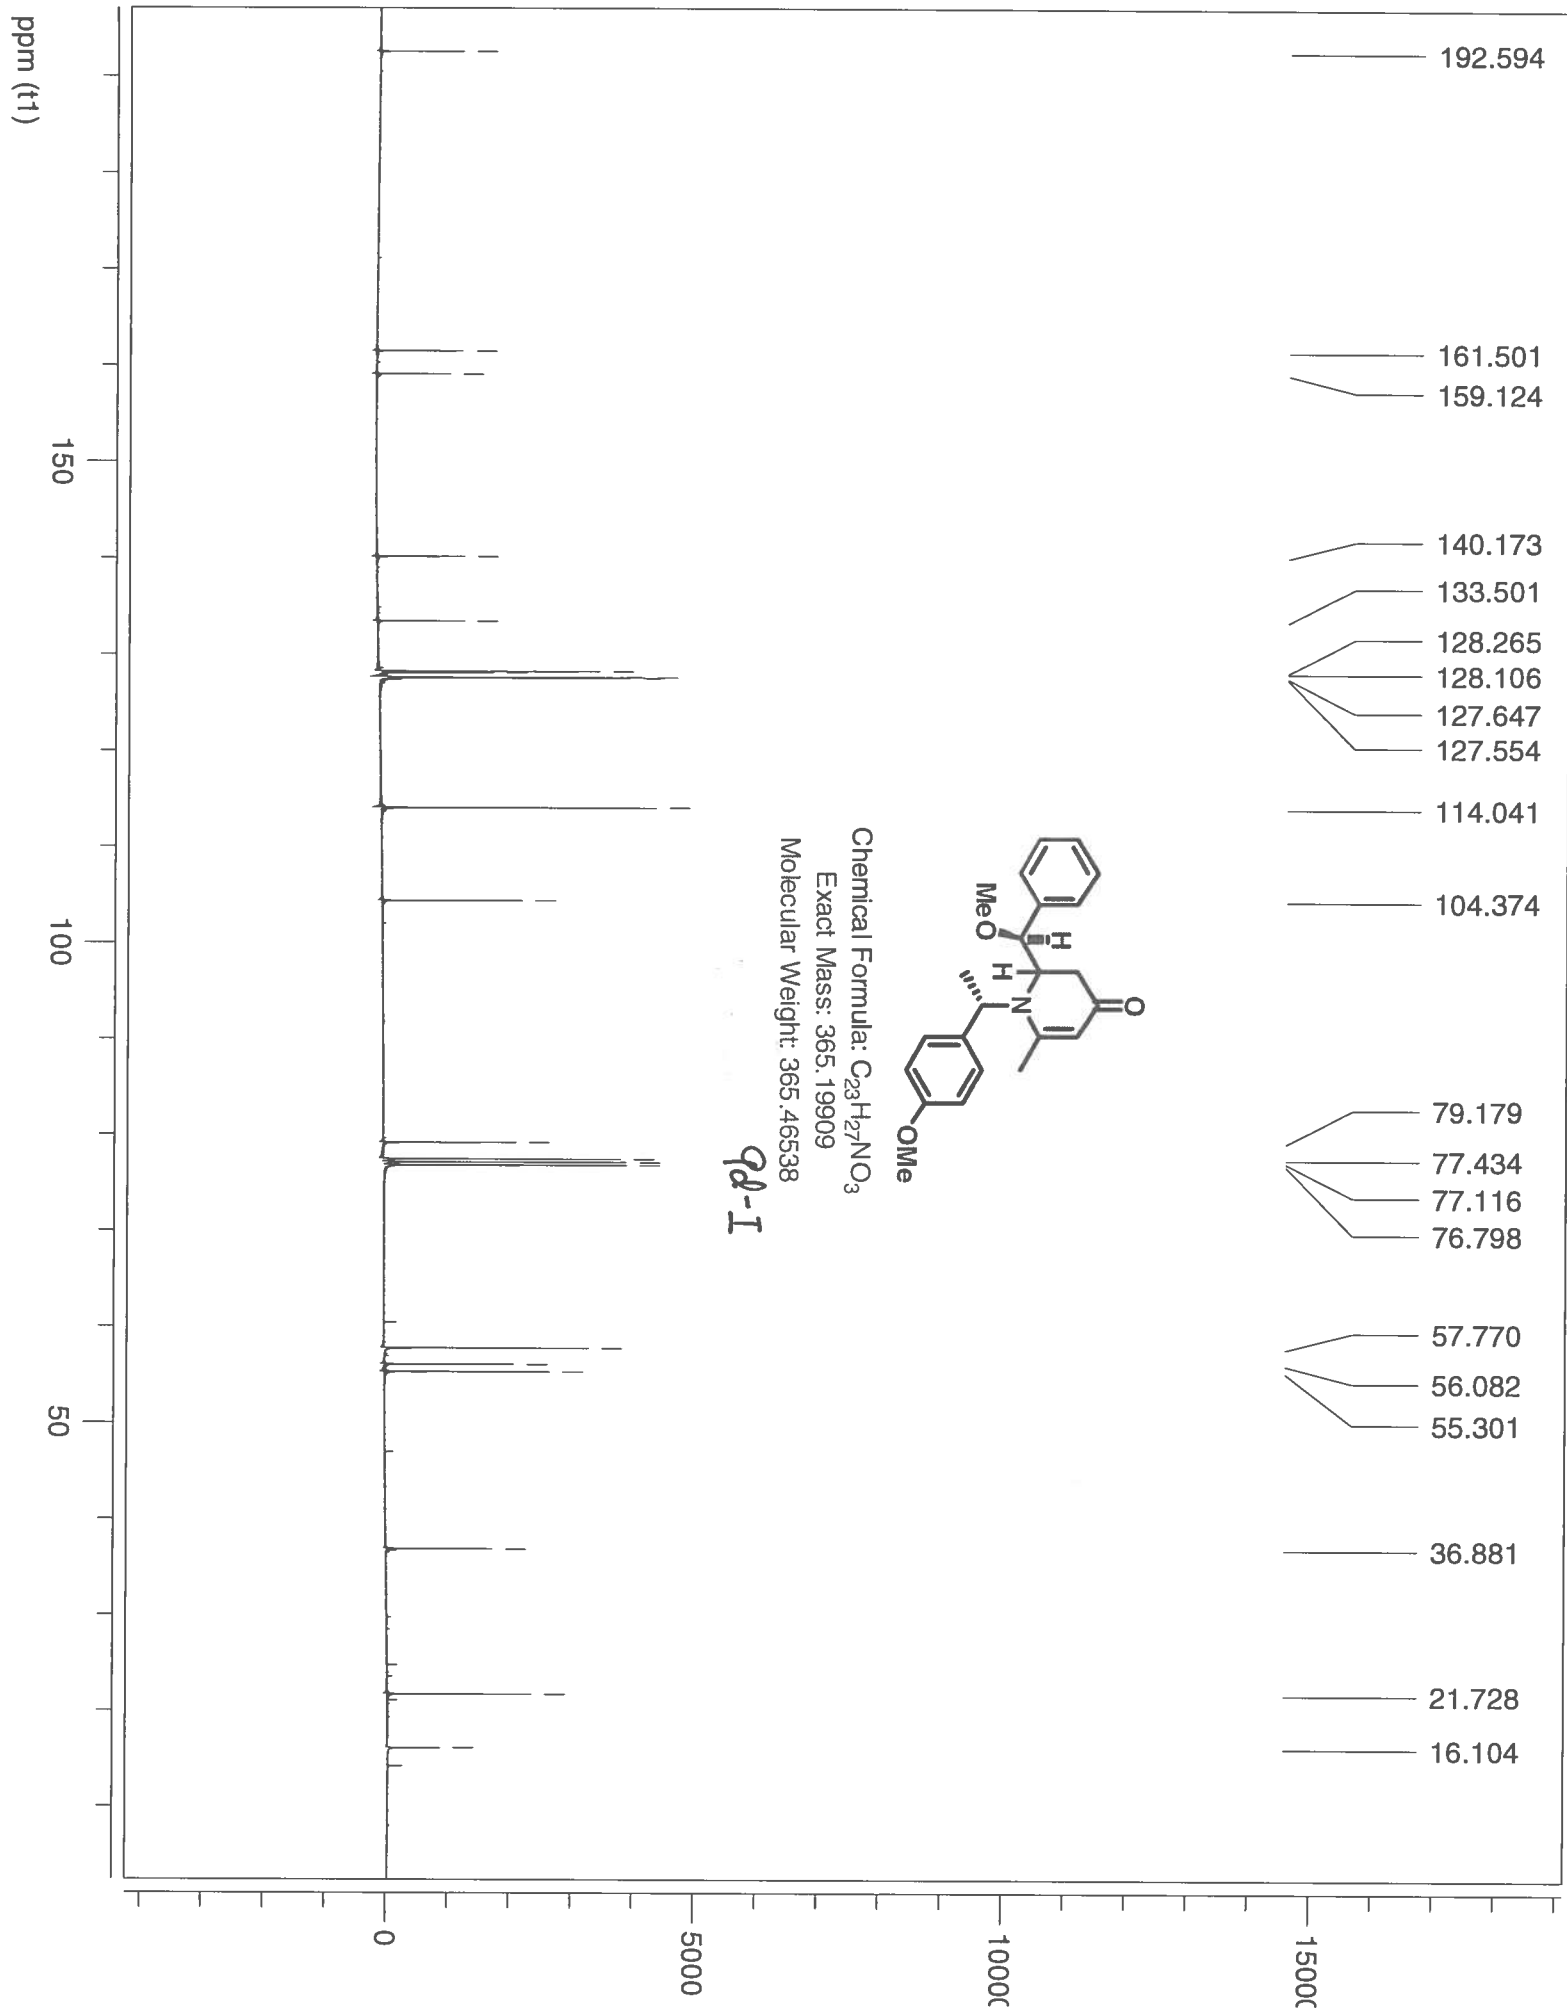



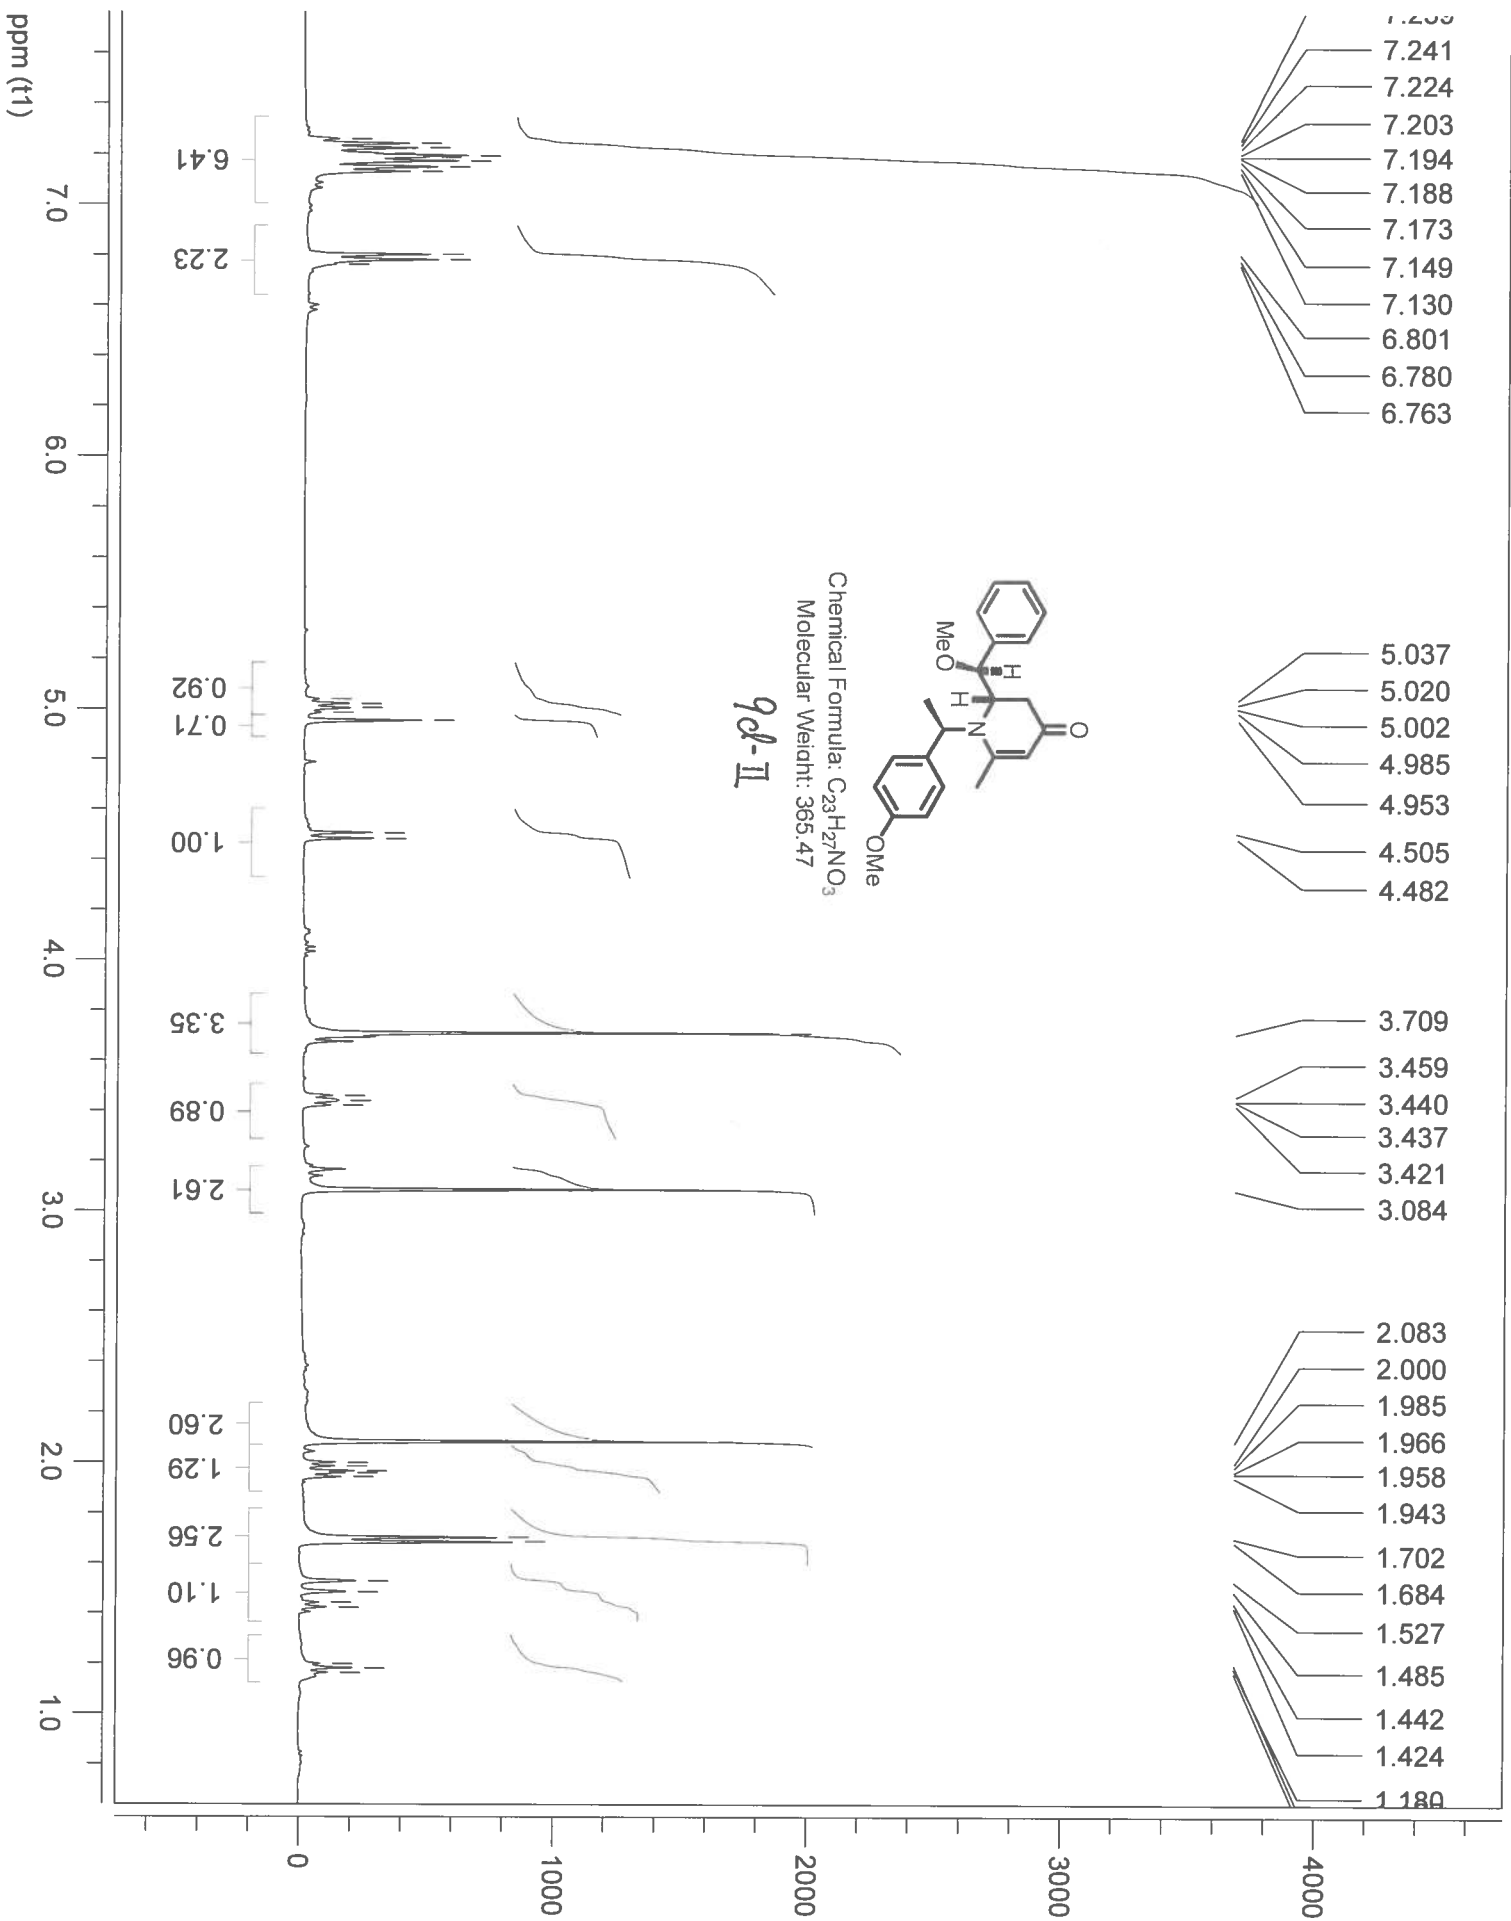

ppm (t1)

150

100

50

190.533

161.019

159.003

139.069

134.314

128.615

128.242

127.899

127.618

114.082

102.025

79.647

77.438

77.120

76.802

58.380

57.157

56.947

55.300

36.539

21.670

19.346

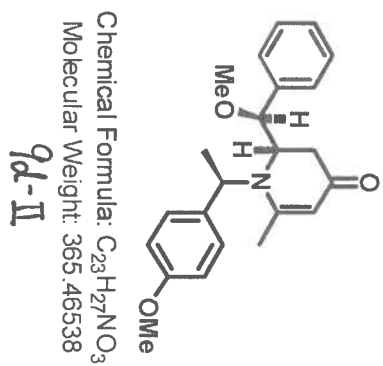

5000

10000

15000

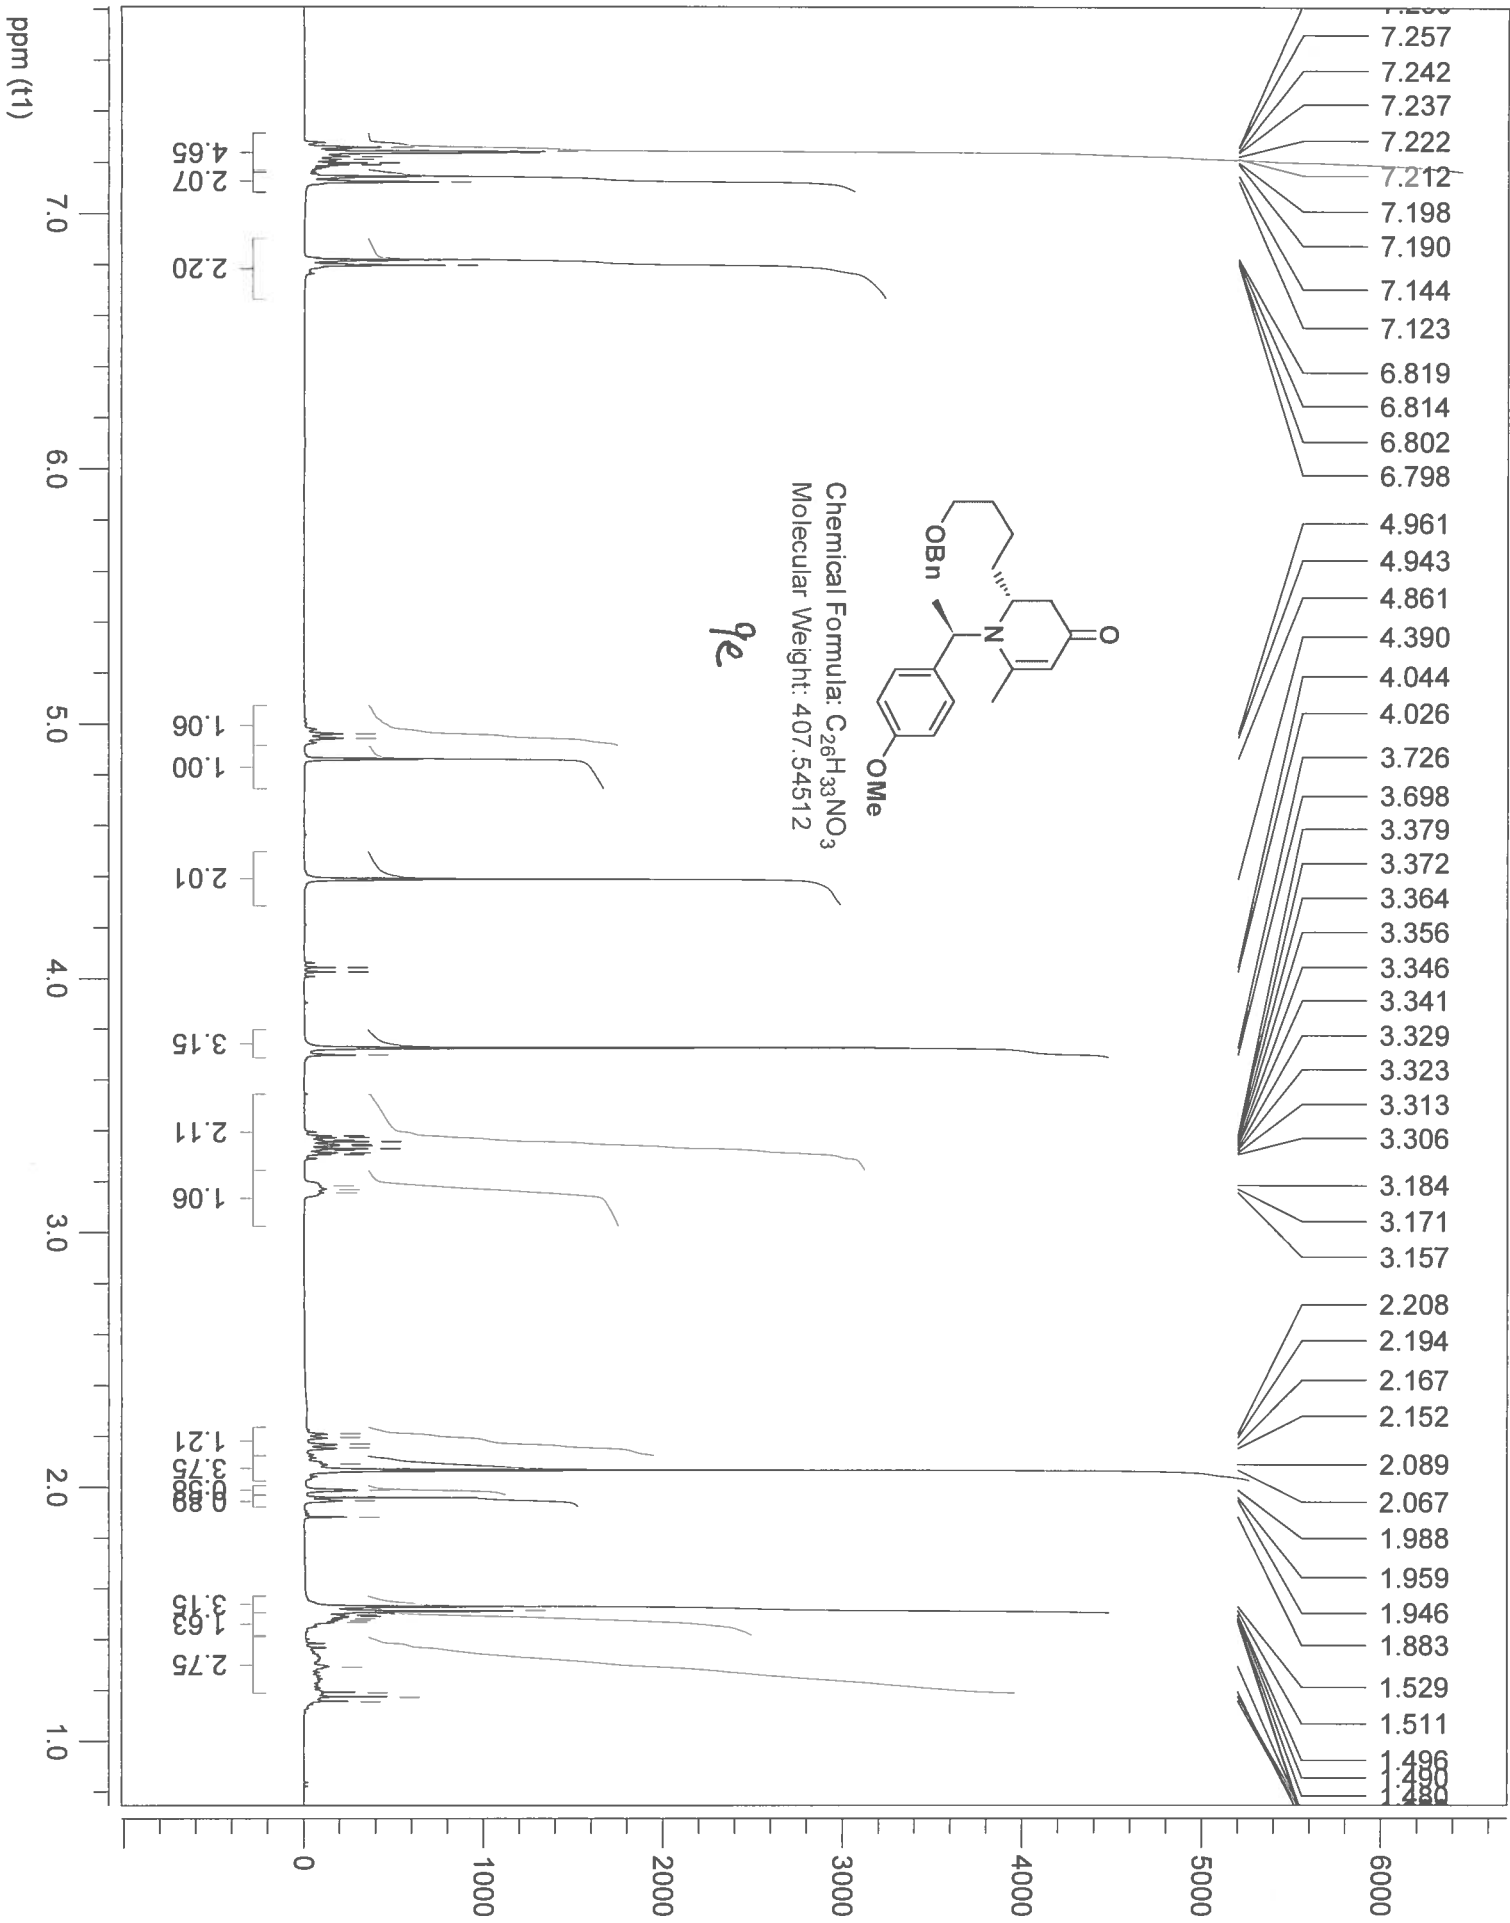

ppm (t1)

150

100

50

0

190.532

159.939

159.134

138.470

133.270

128.403

127.739

127.702

127.676

127.640

127.580

114.082

100.013

77.492

77.174

76.855

73.034

70.127

55.458

55.337

52.759

37.998

29.873

29.665

22.750

21.516

17.462

14.244

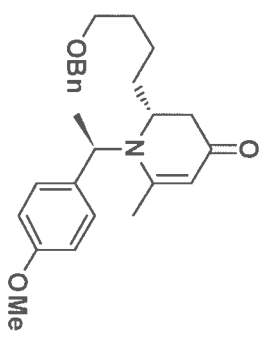

Chemical Formula: C<sub>26</sub>H<sub>33</sub>NO<sub>3</sub>  
Molecular Weight: 407.54512

92

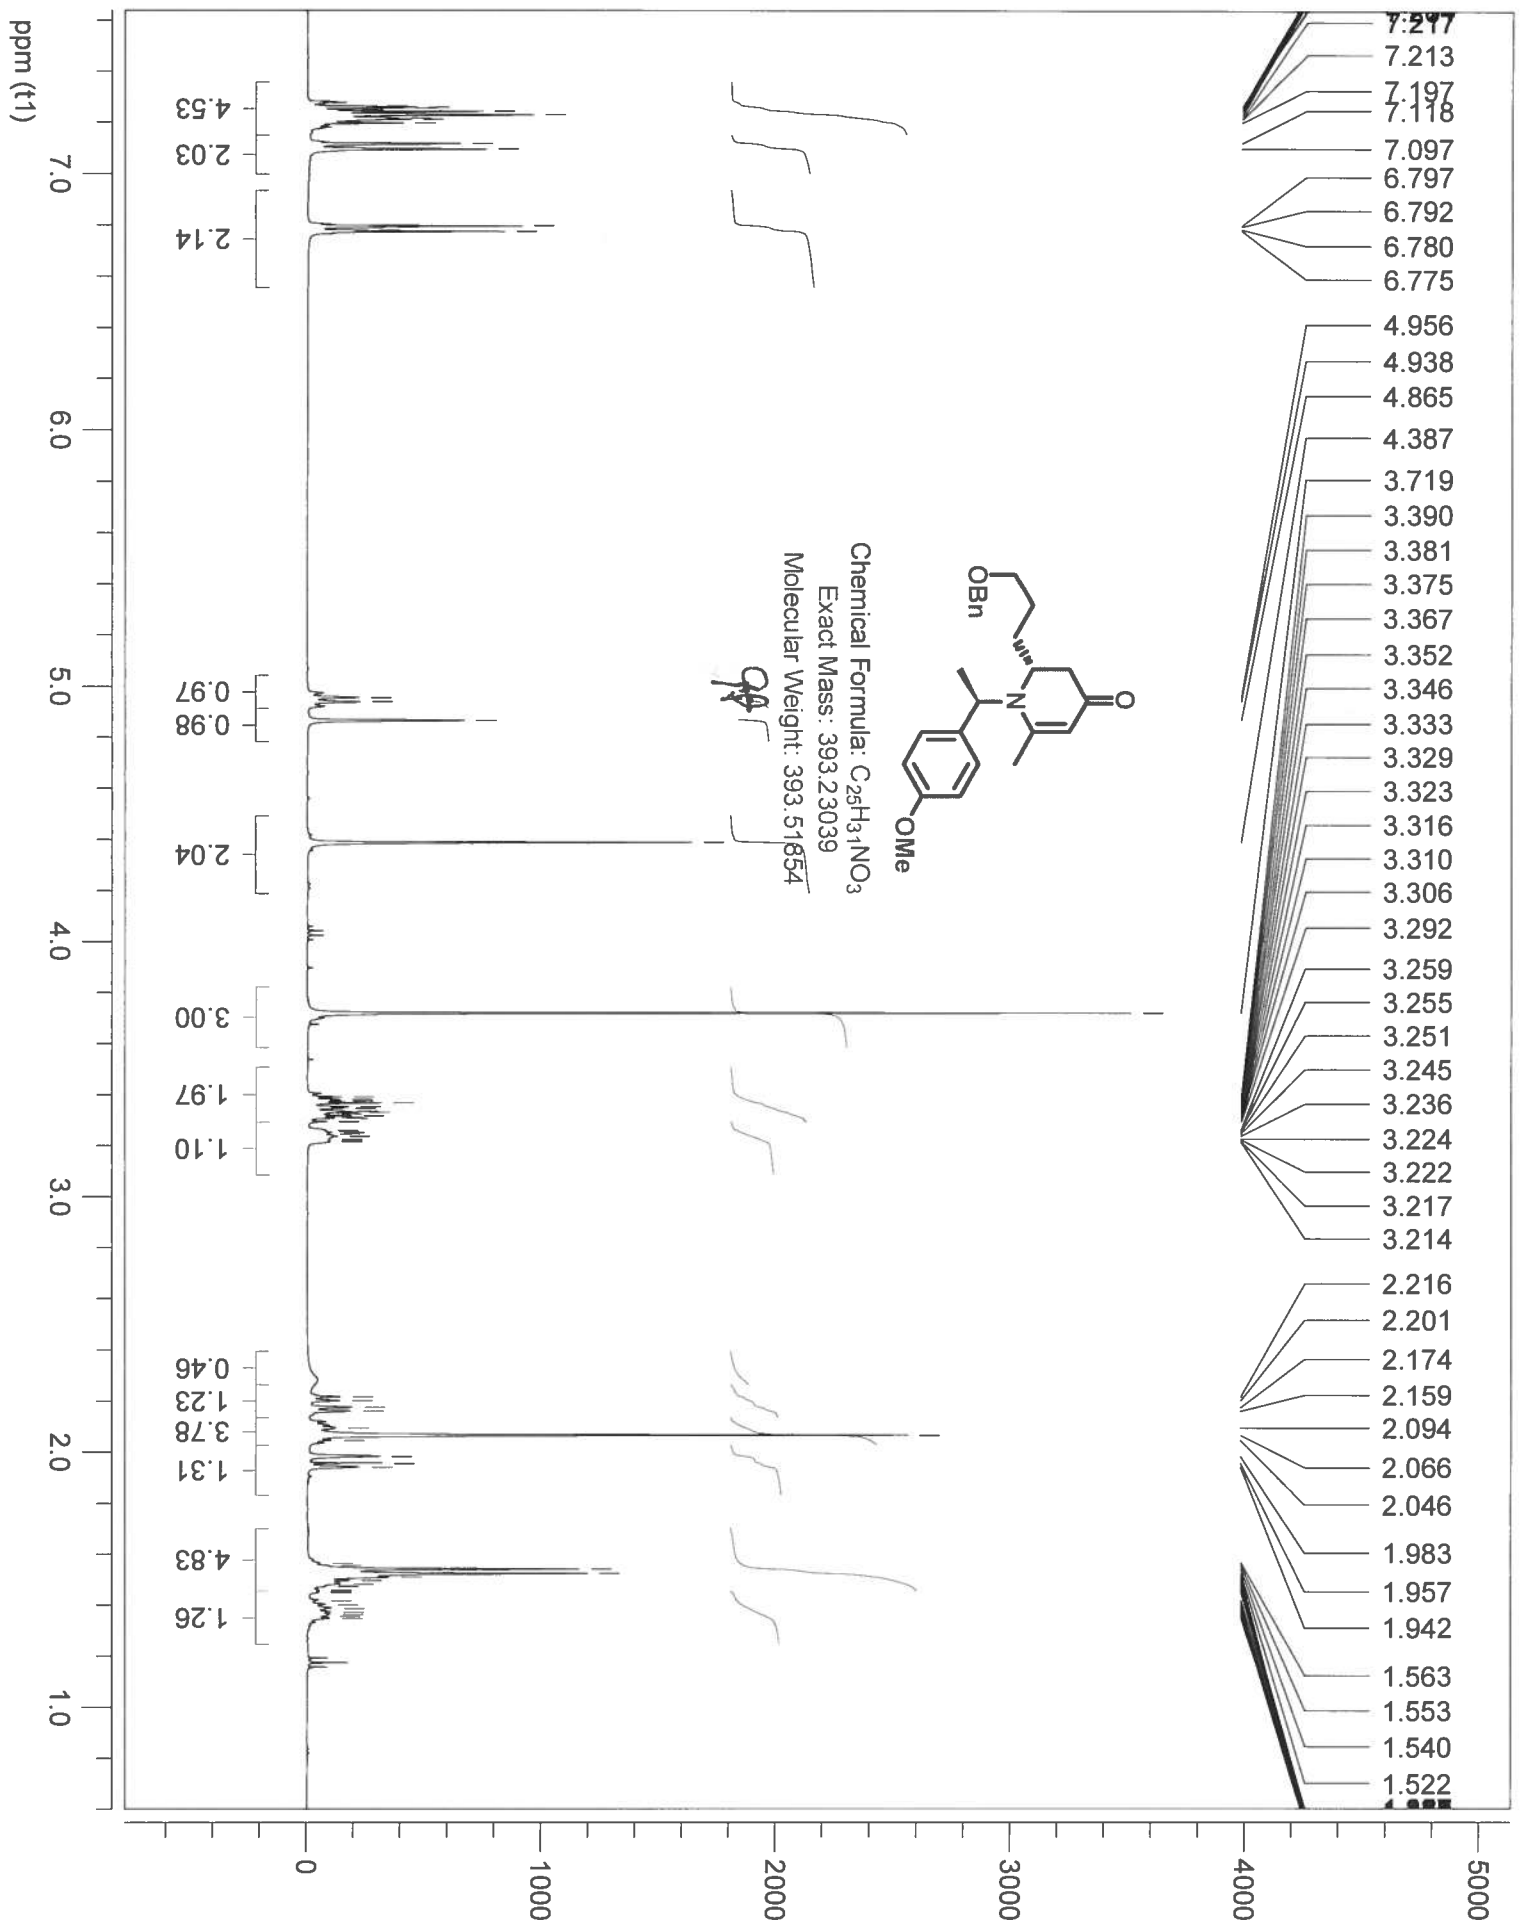

ppm (t1)

150

100

50

0

5000

10000

15000

190.489

160.005

159.106

138.374

133.267

128.395

127.689

127.655

127.593

114.055

100.034

77.502

77.184

76.865

72.973

69.815

55.501

55.325

52.481

38.010

26.667

25.962

21.525

17.415

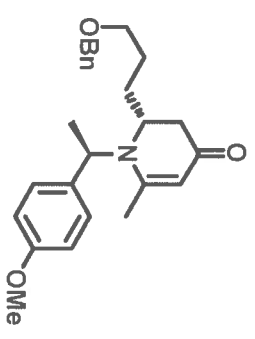

Chemical Formula: C<sub>25</sub>H<sub>23</sub>N<sub>2</sub>O<sub>3</sub>

Exact Mass: 393.23039

Molecular Weight: 393.51854

94

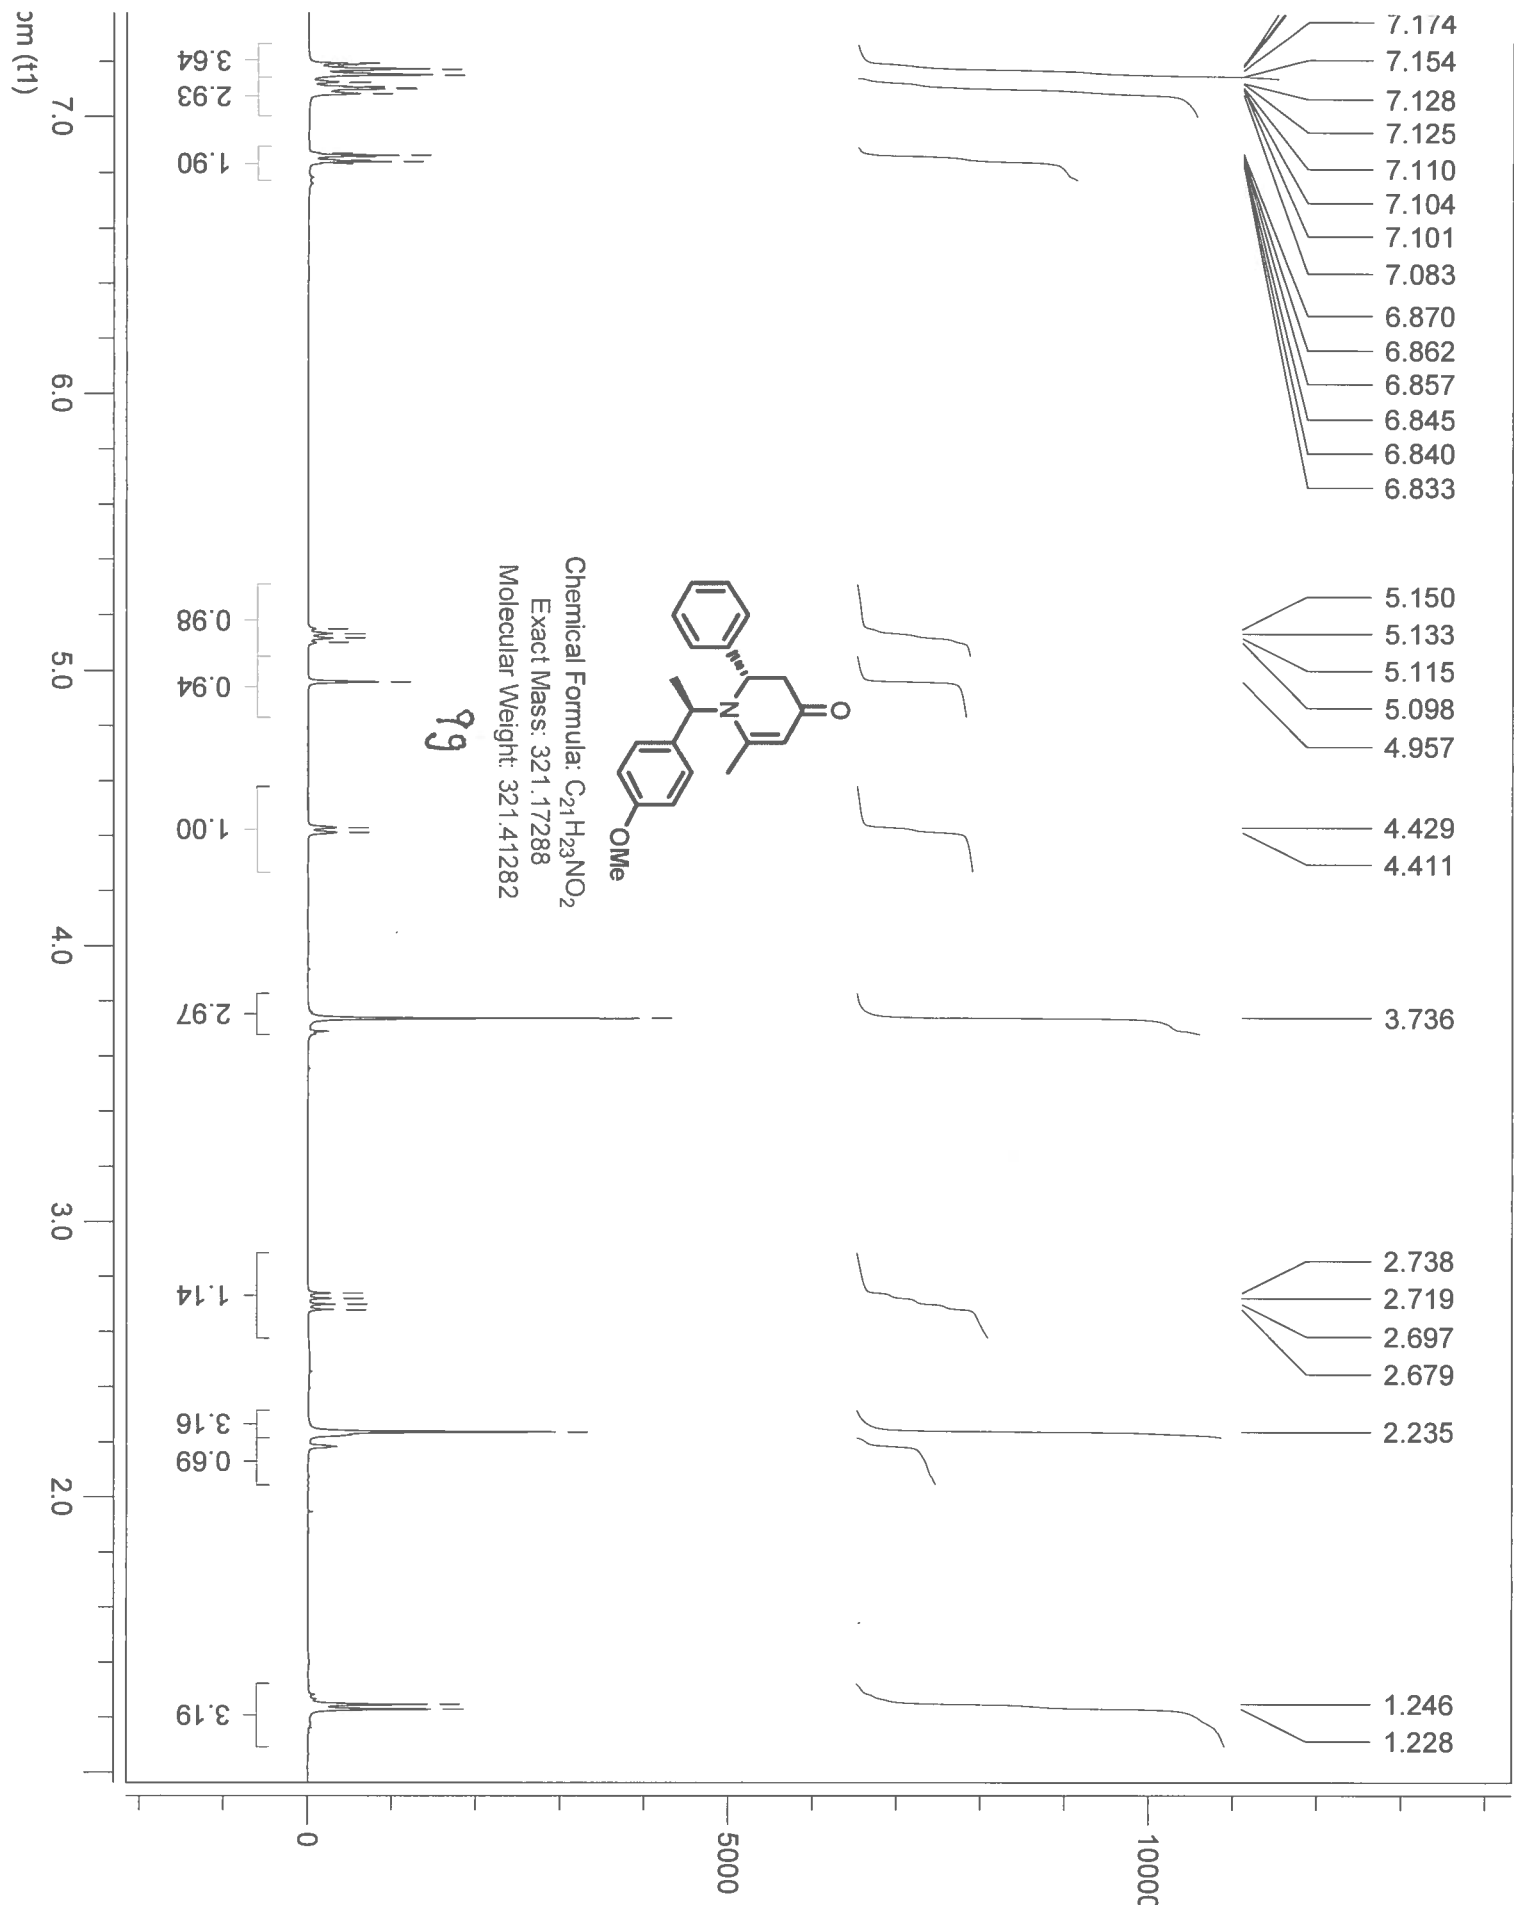

ppm (t1)

150

100

50

0

5000

188.985

161.601

159.215

140.643

133.293

128.630

127.615

127.312

126.031

114.247

101.528

77.553

77.234

76.915

56.096

56.028

55.380

42.687

21.668

17.735

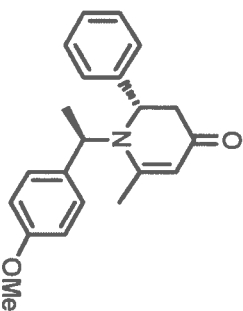

Chemical Formula:  $C_{21}H_{23}NO_2$   
Exact Mass: 321.17288  
Molecular Weight: 321.41282

99



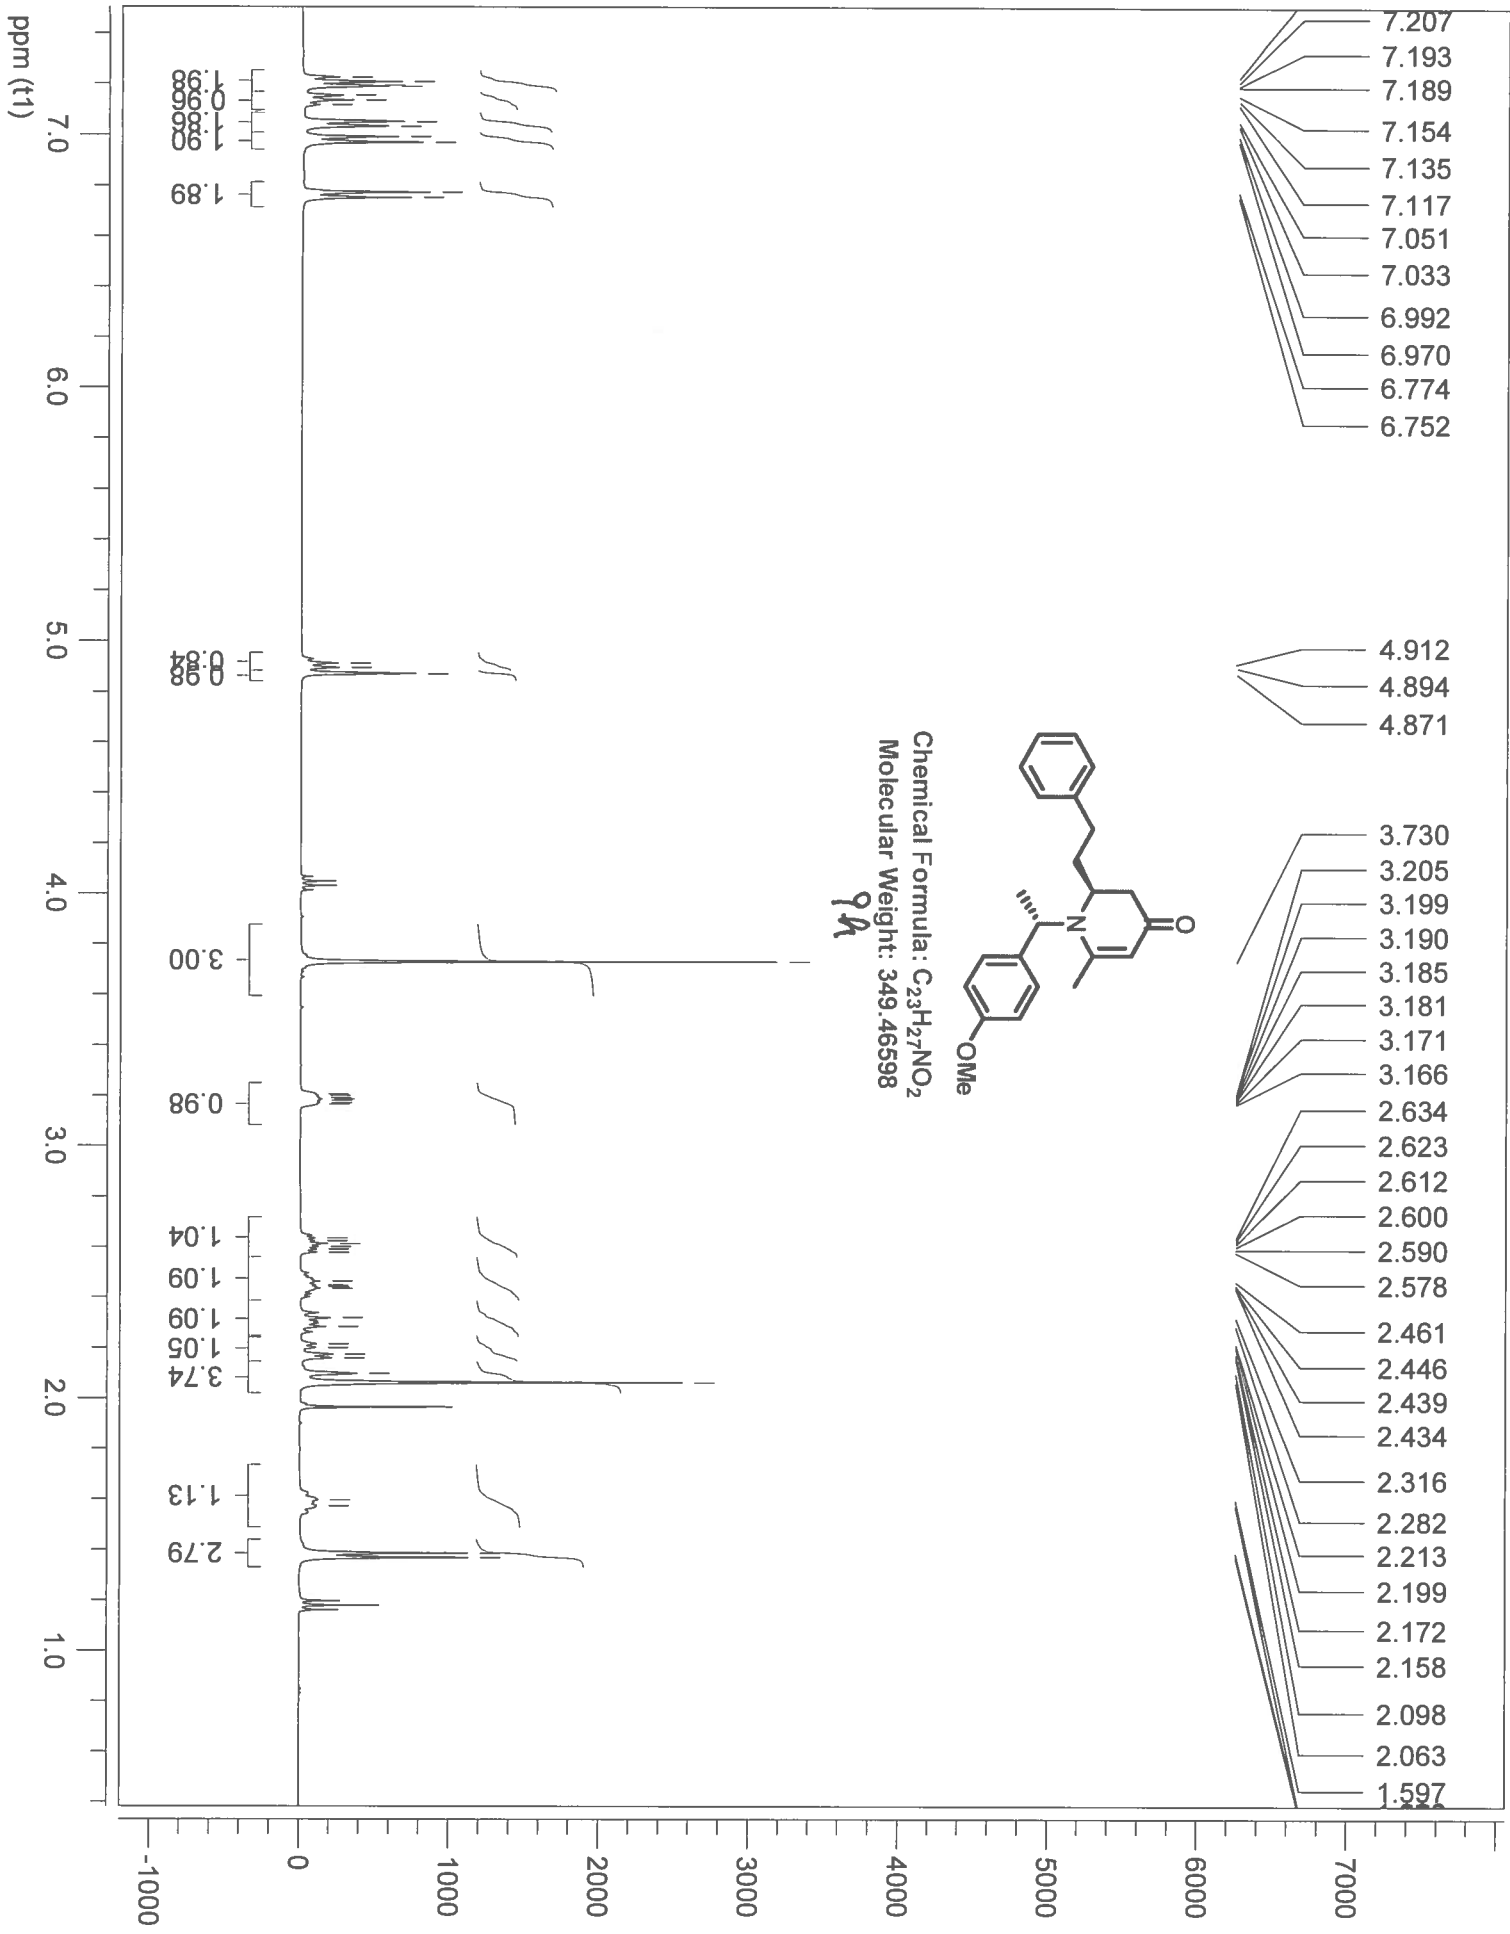

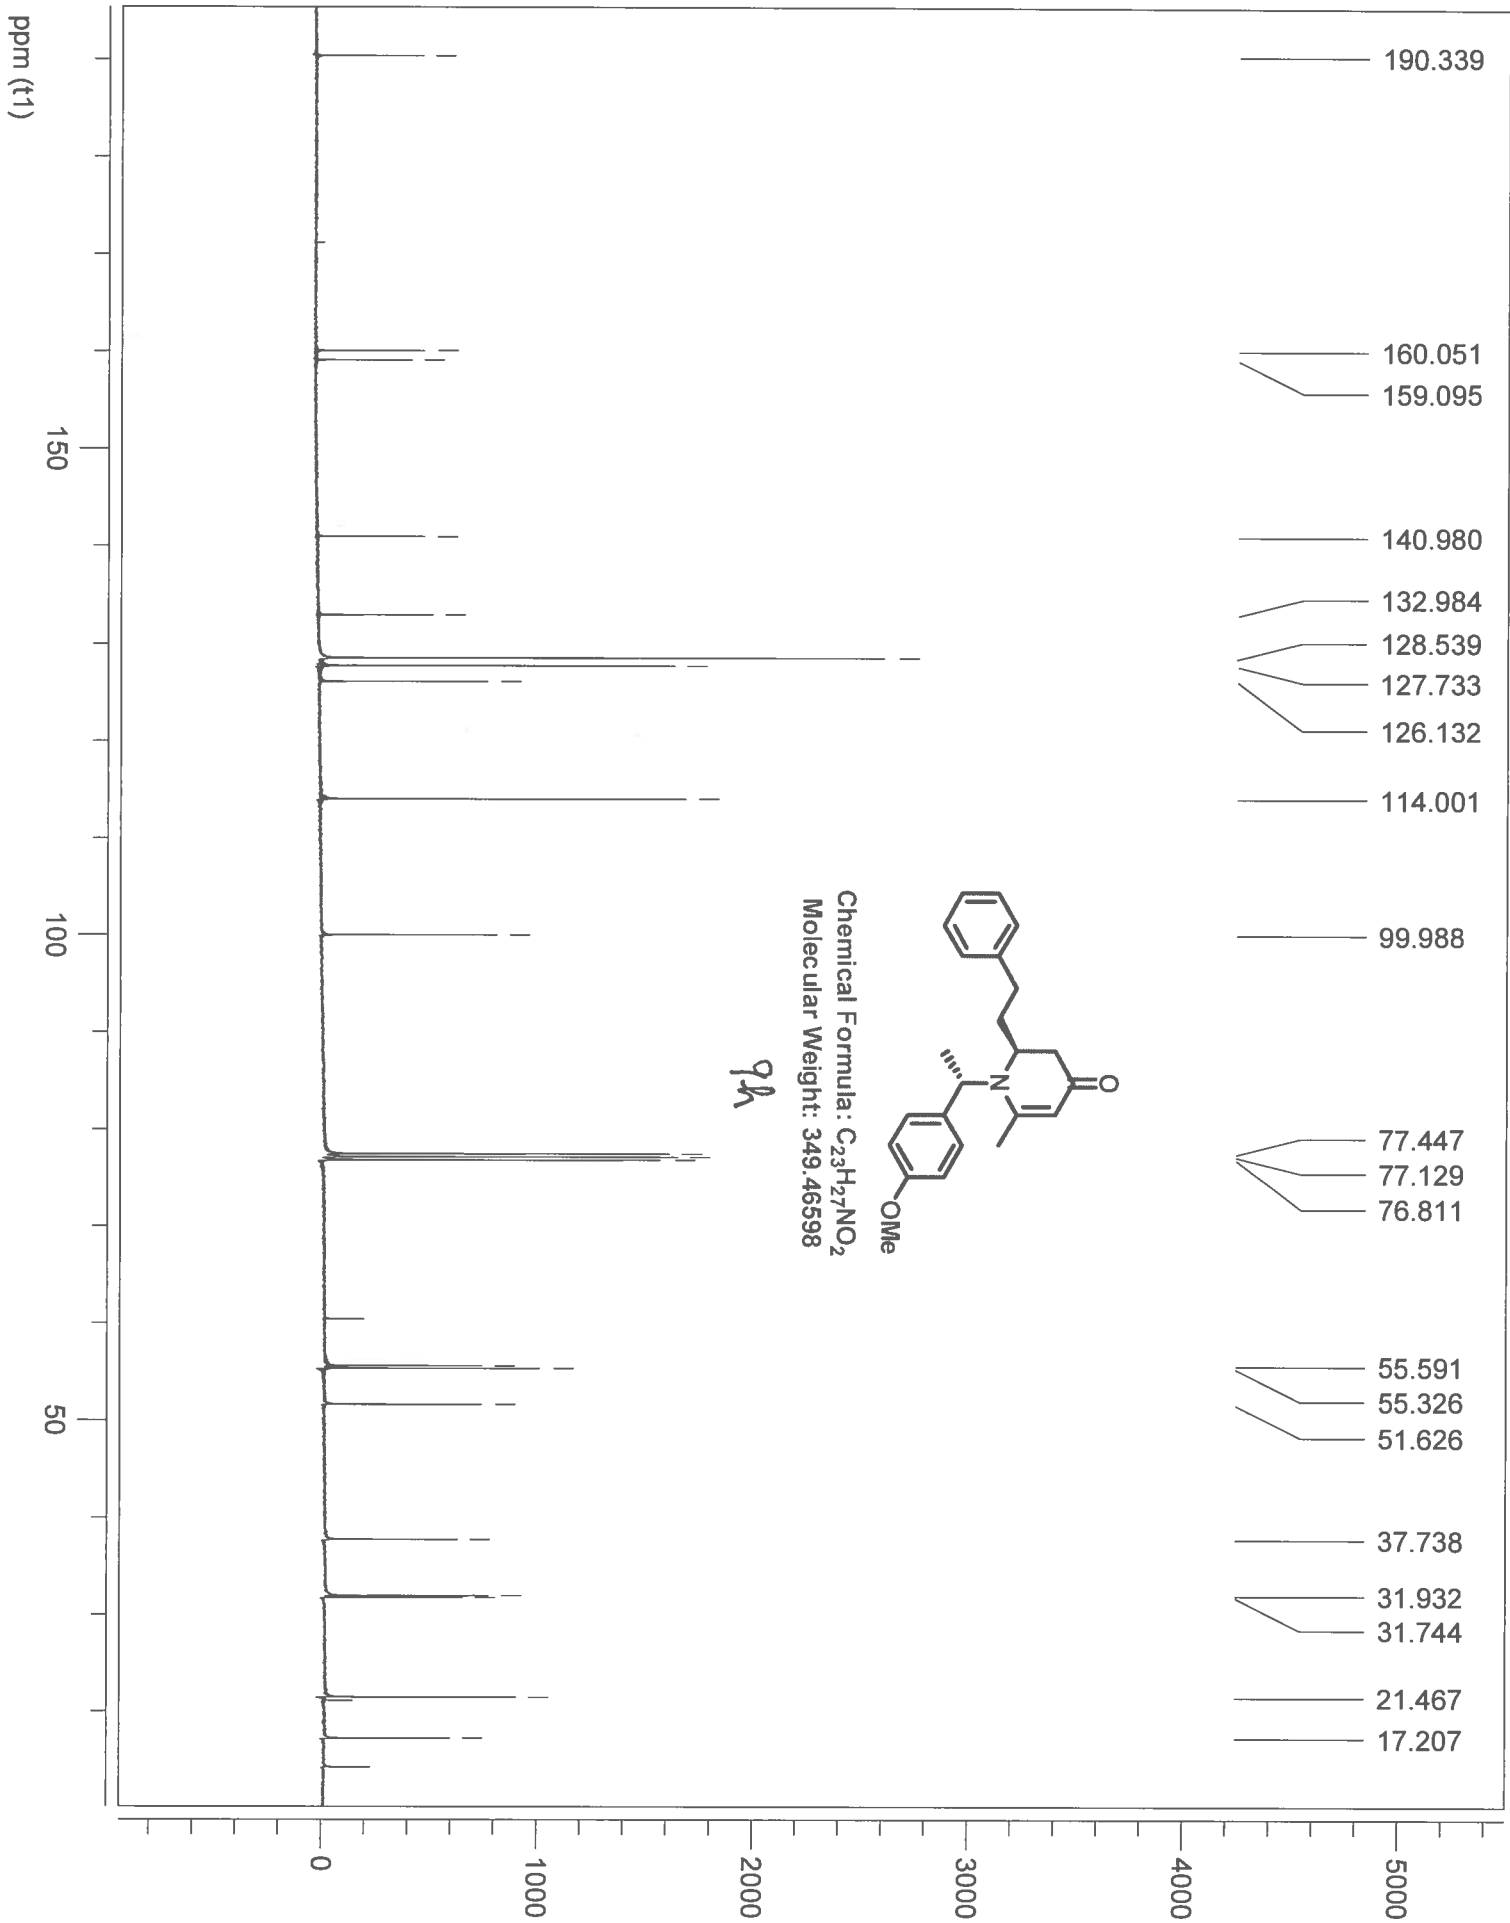

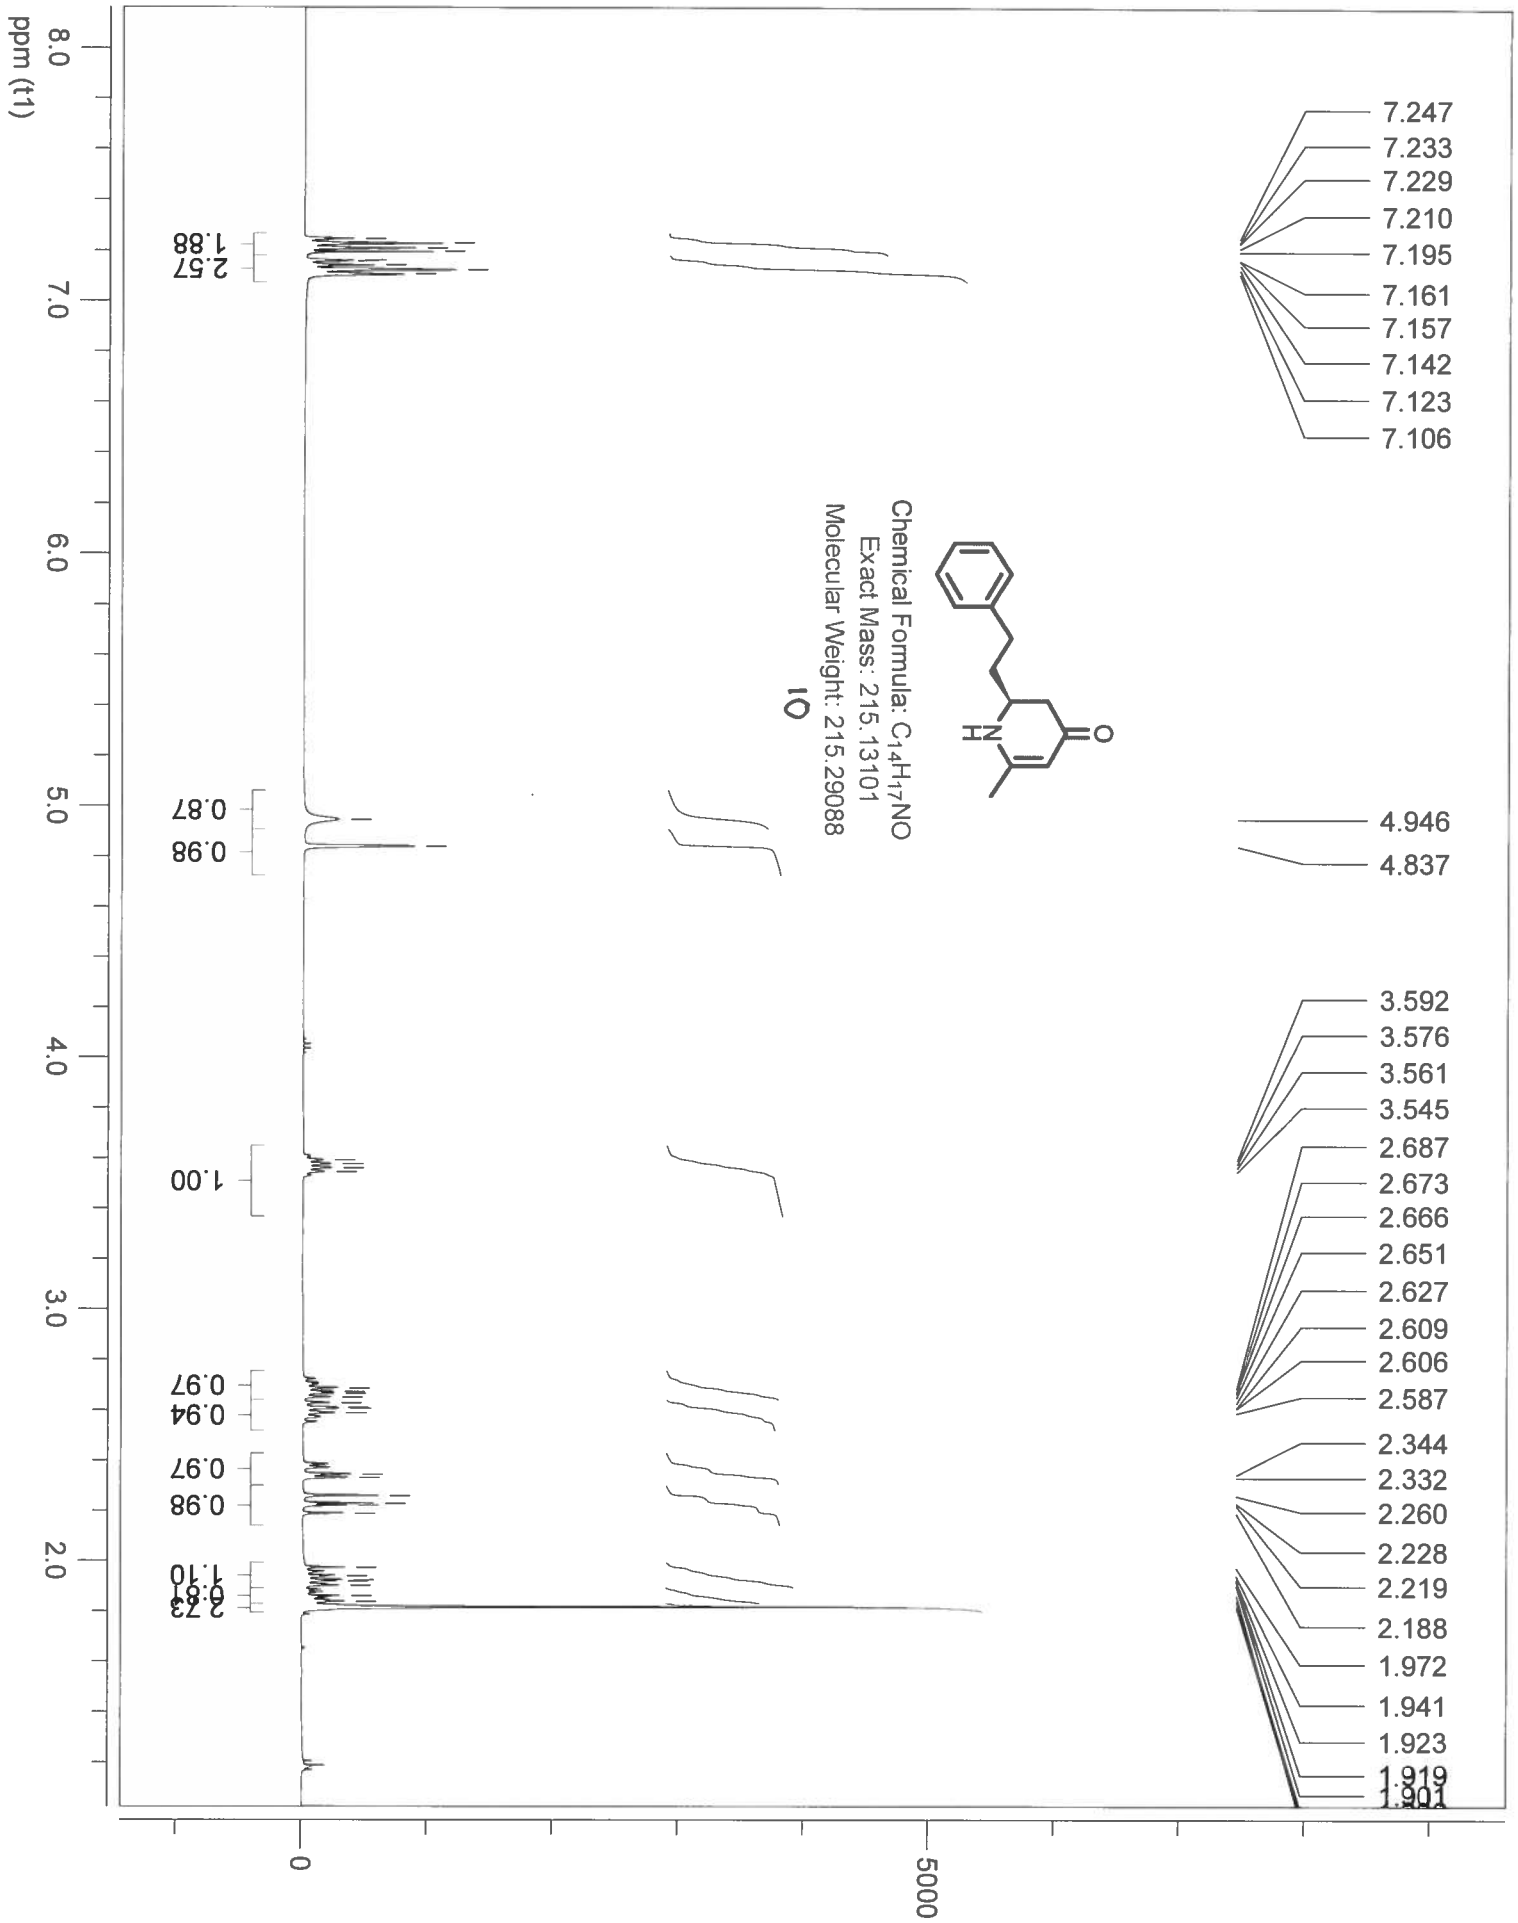

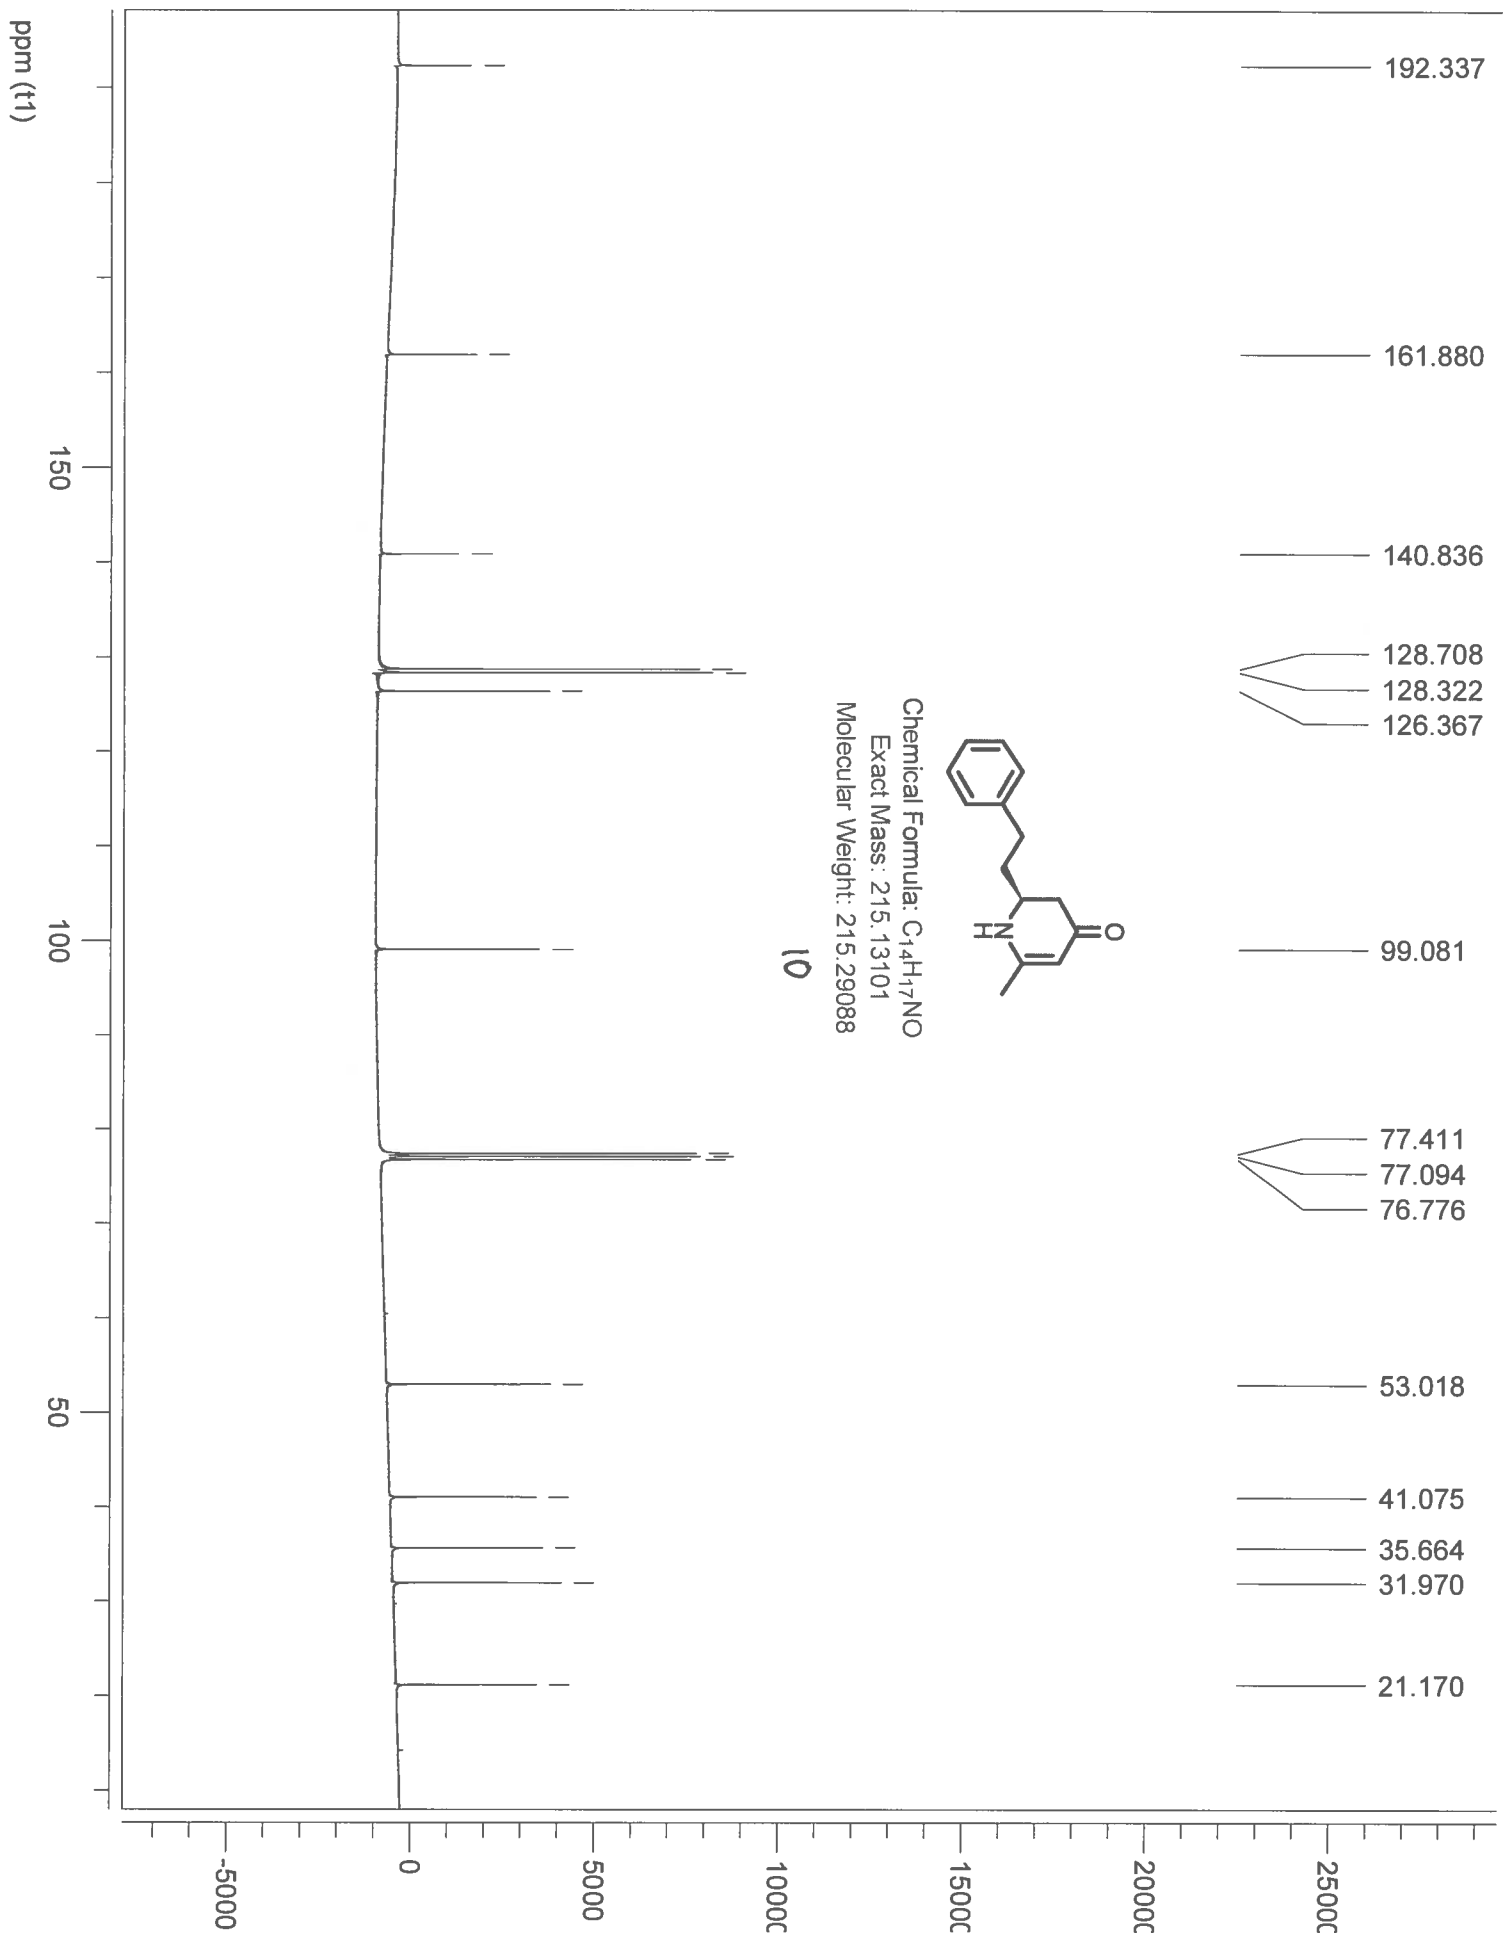

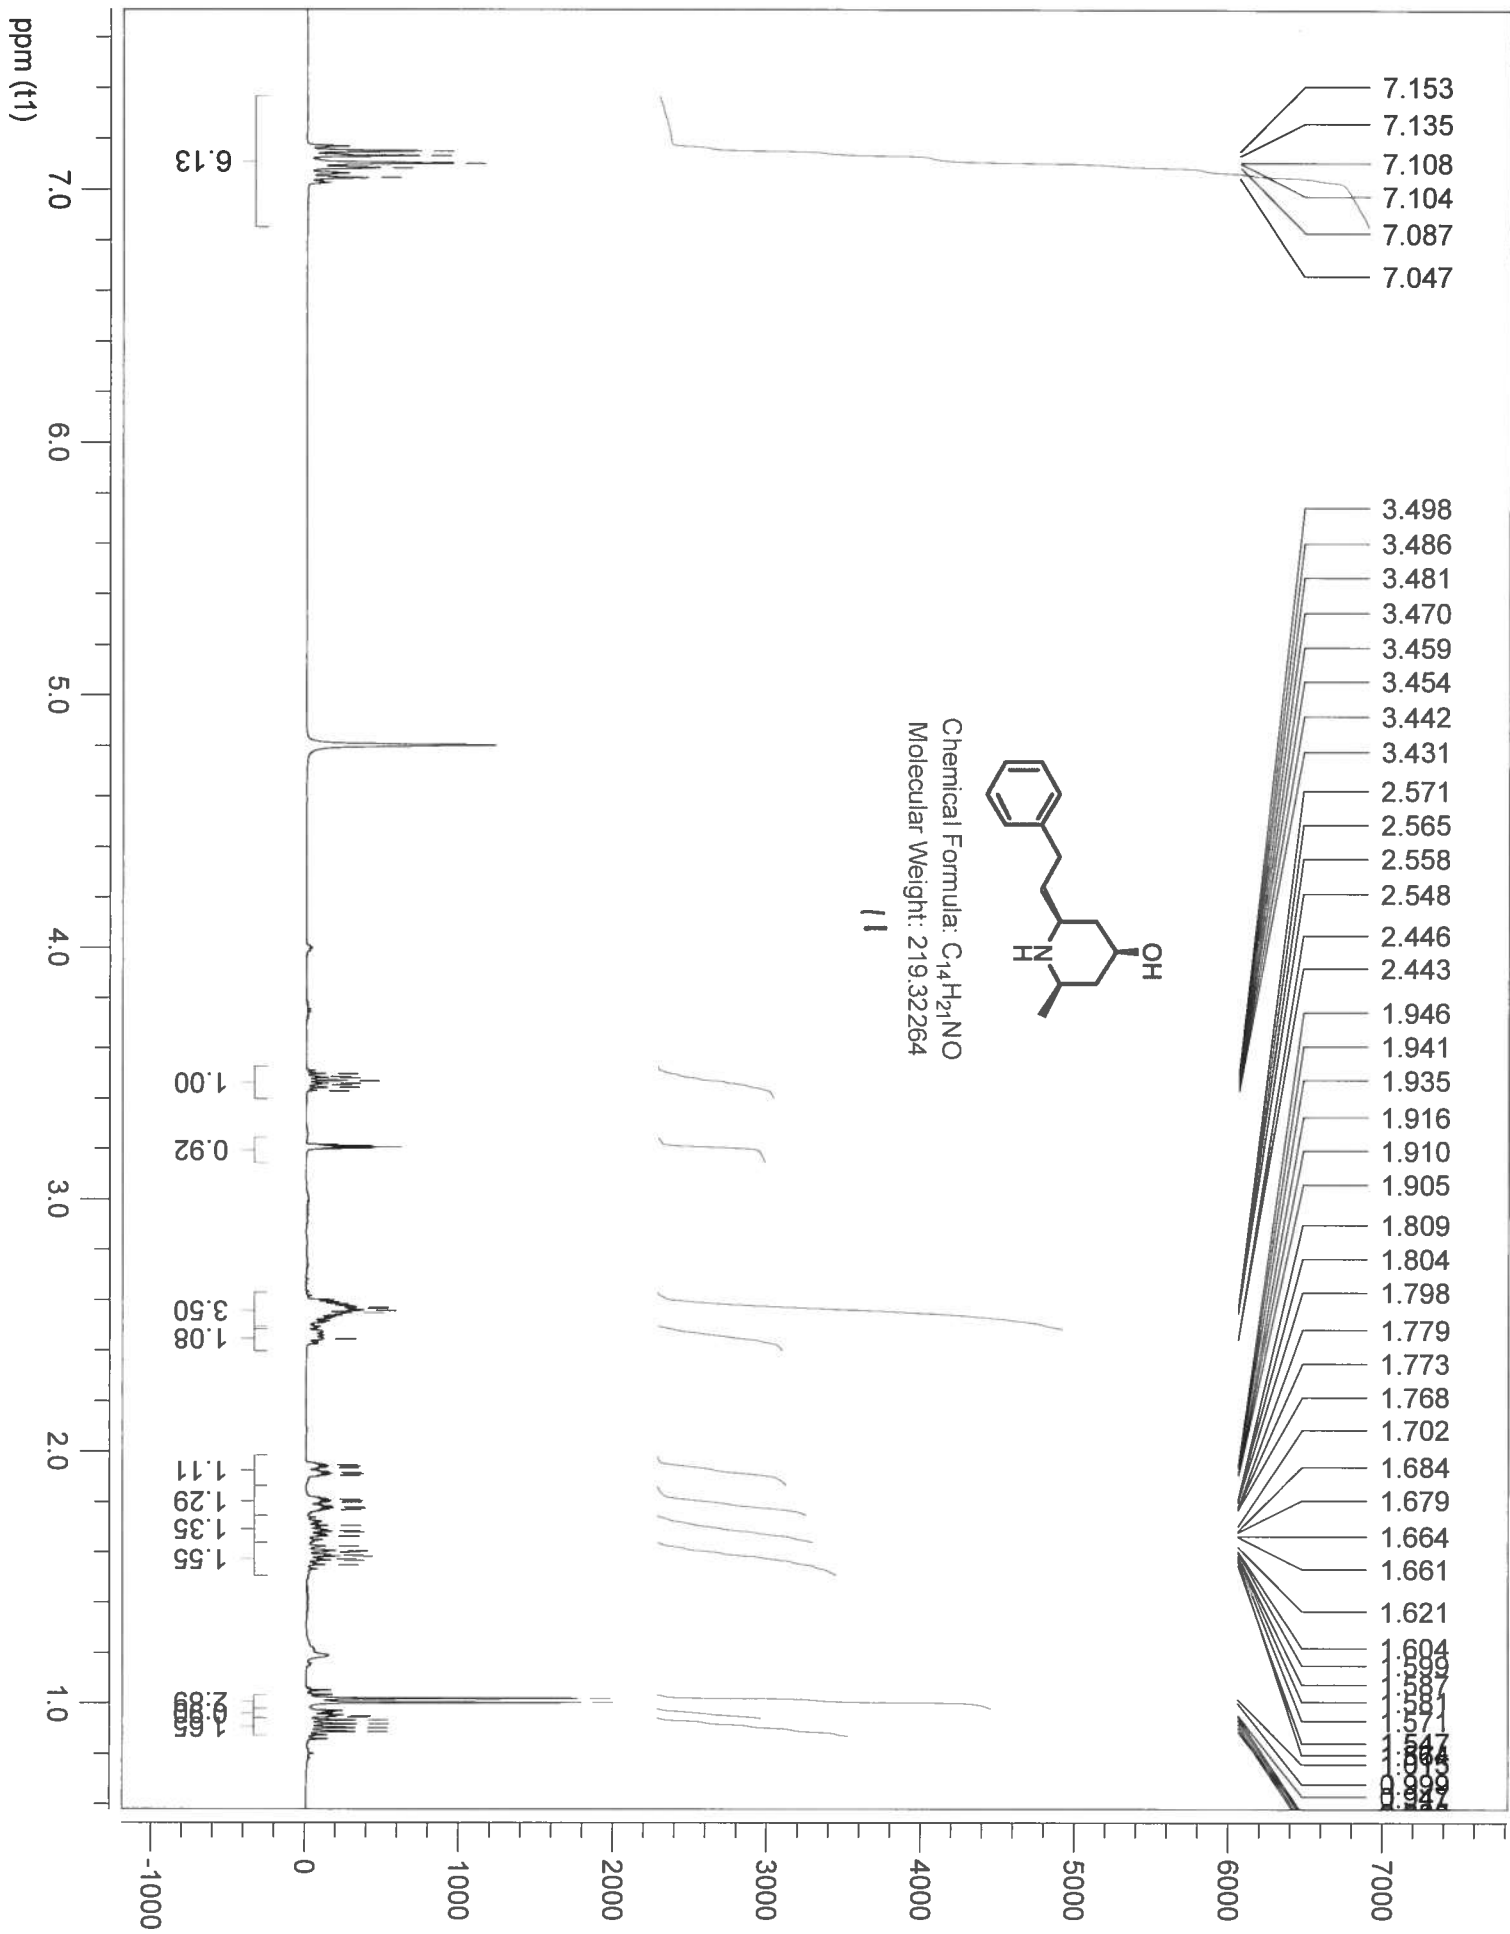

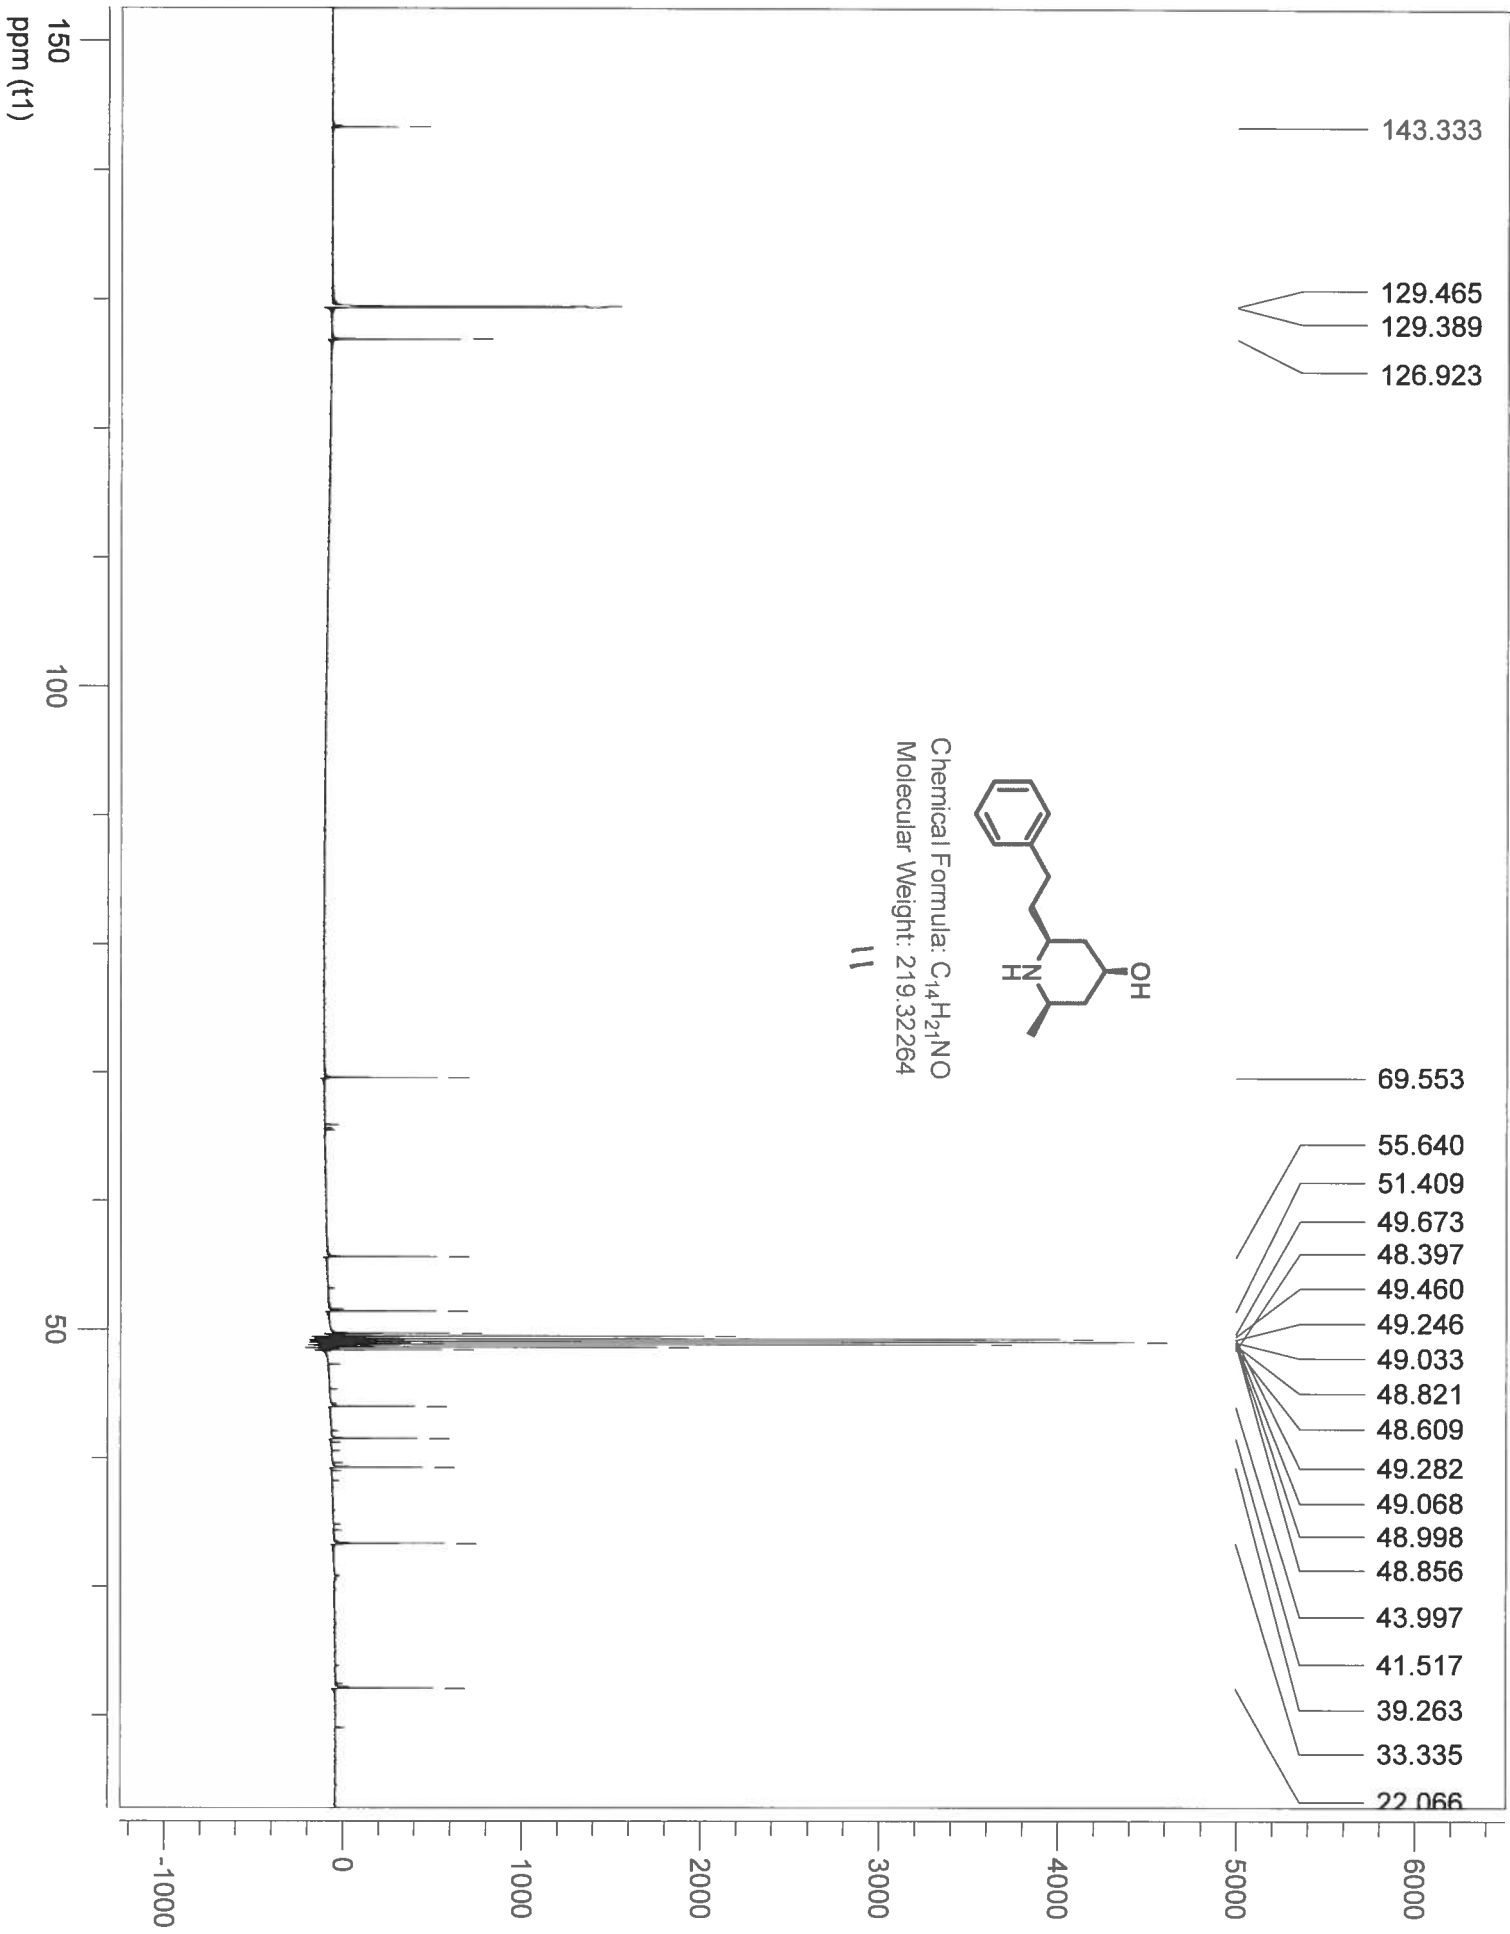



ppm (t1)

100

50

141.922

129.693

129.392

129.356

127.398

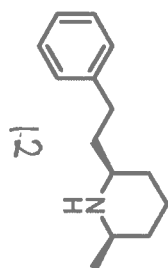

58.309

54.884

36.969

32.312

31.868

29.187

23.604

19.777

5000

10000

15000

20000



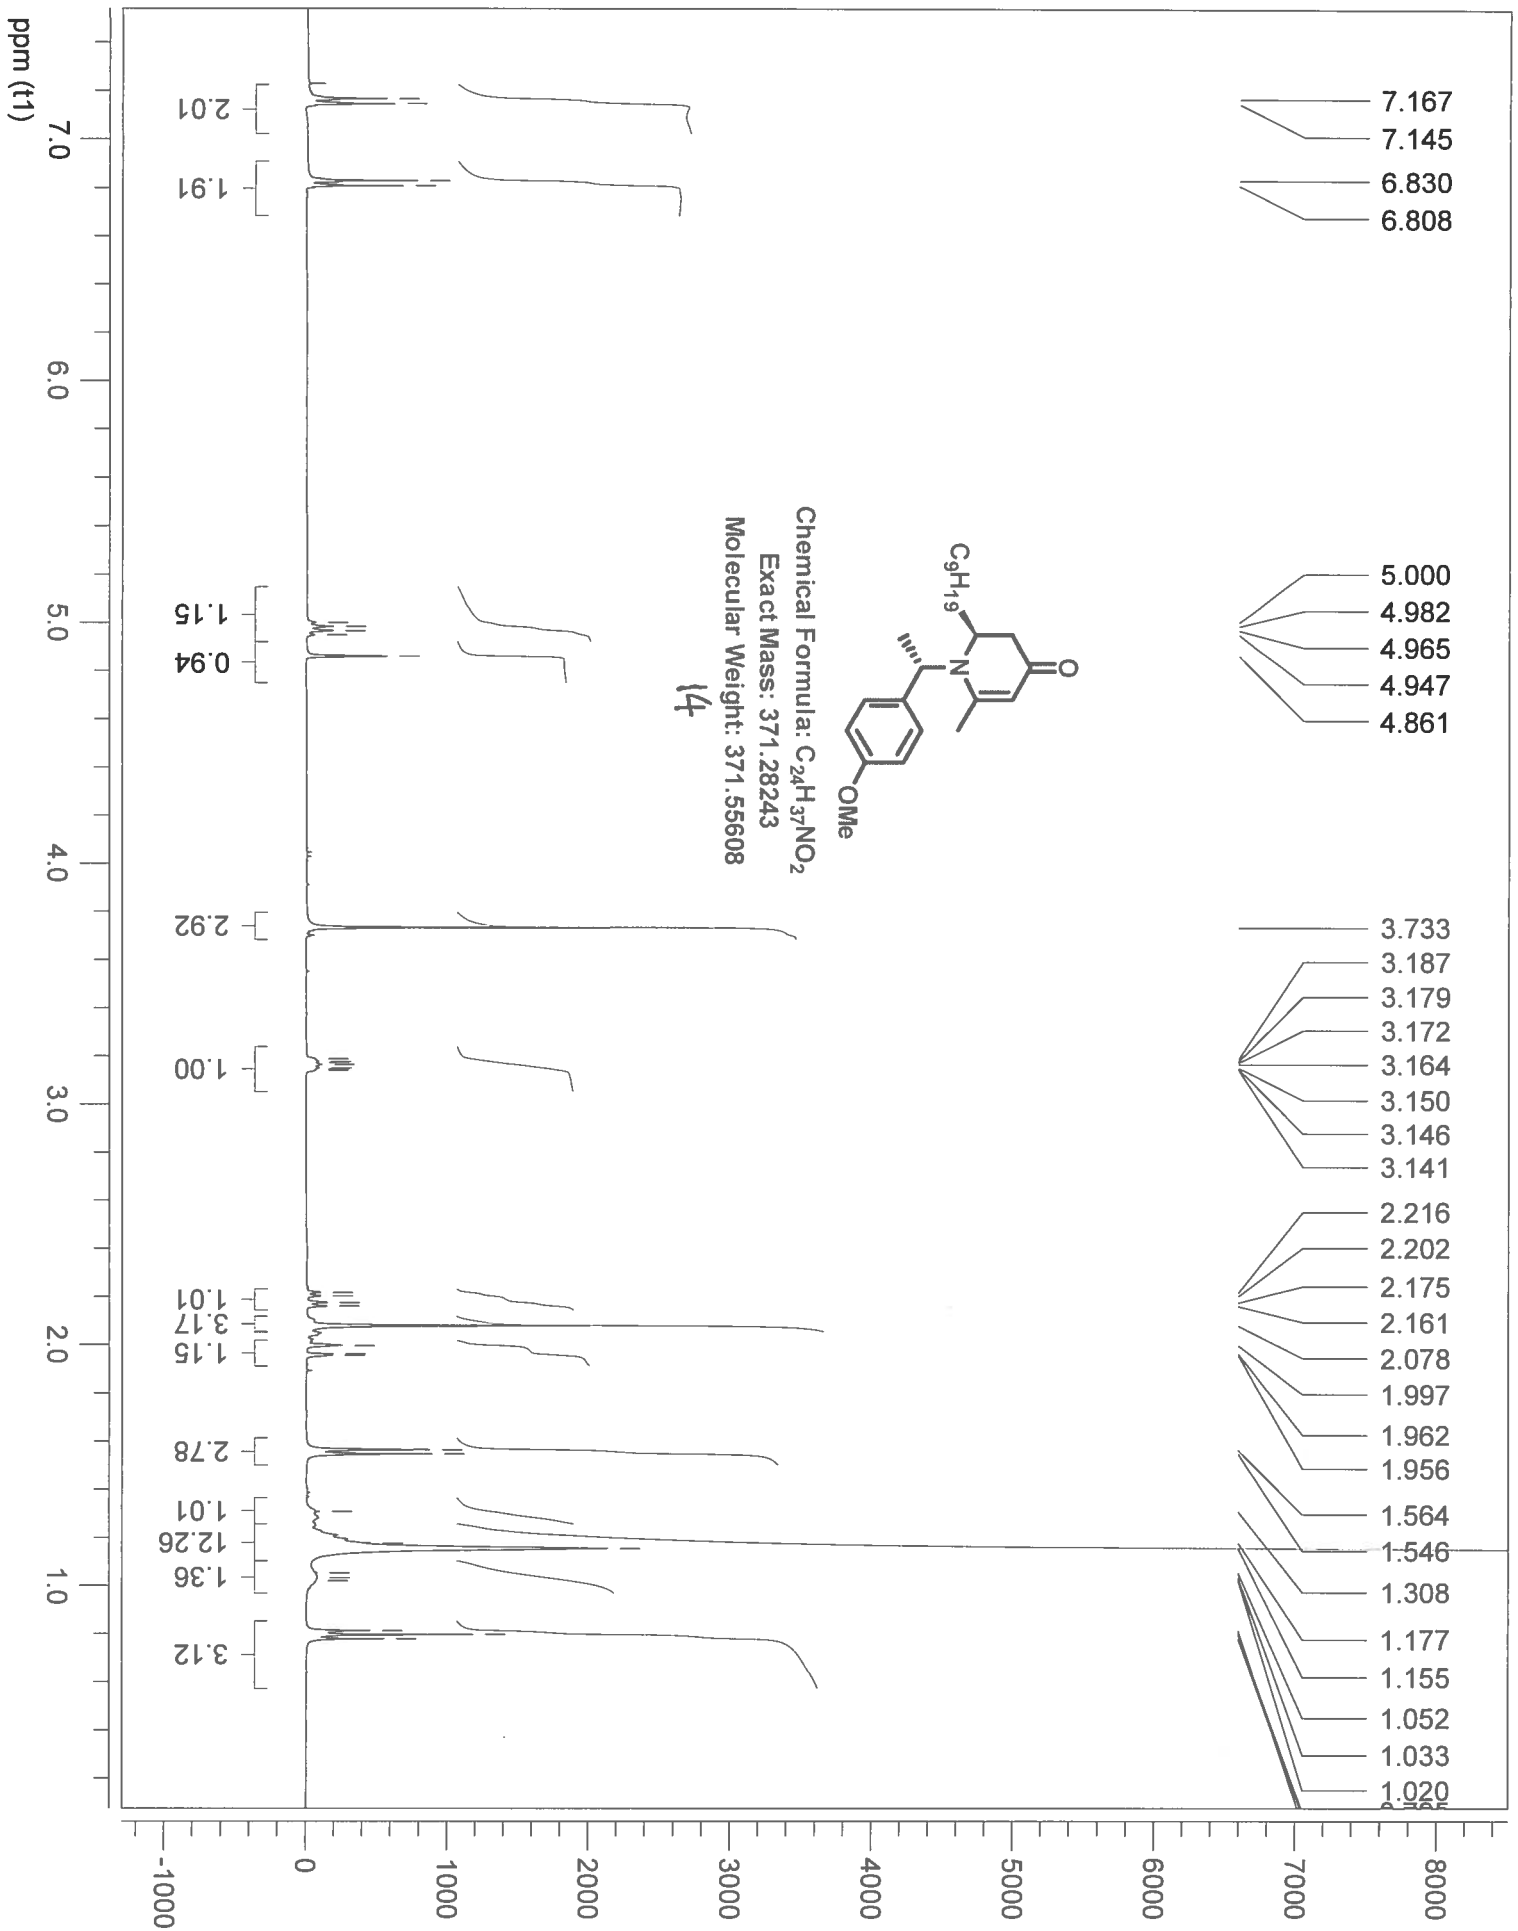

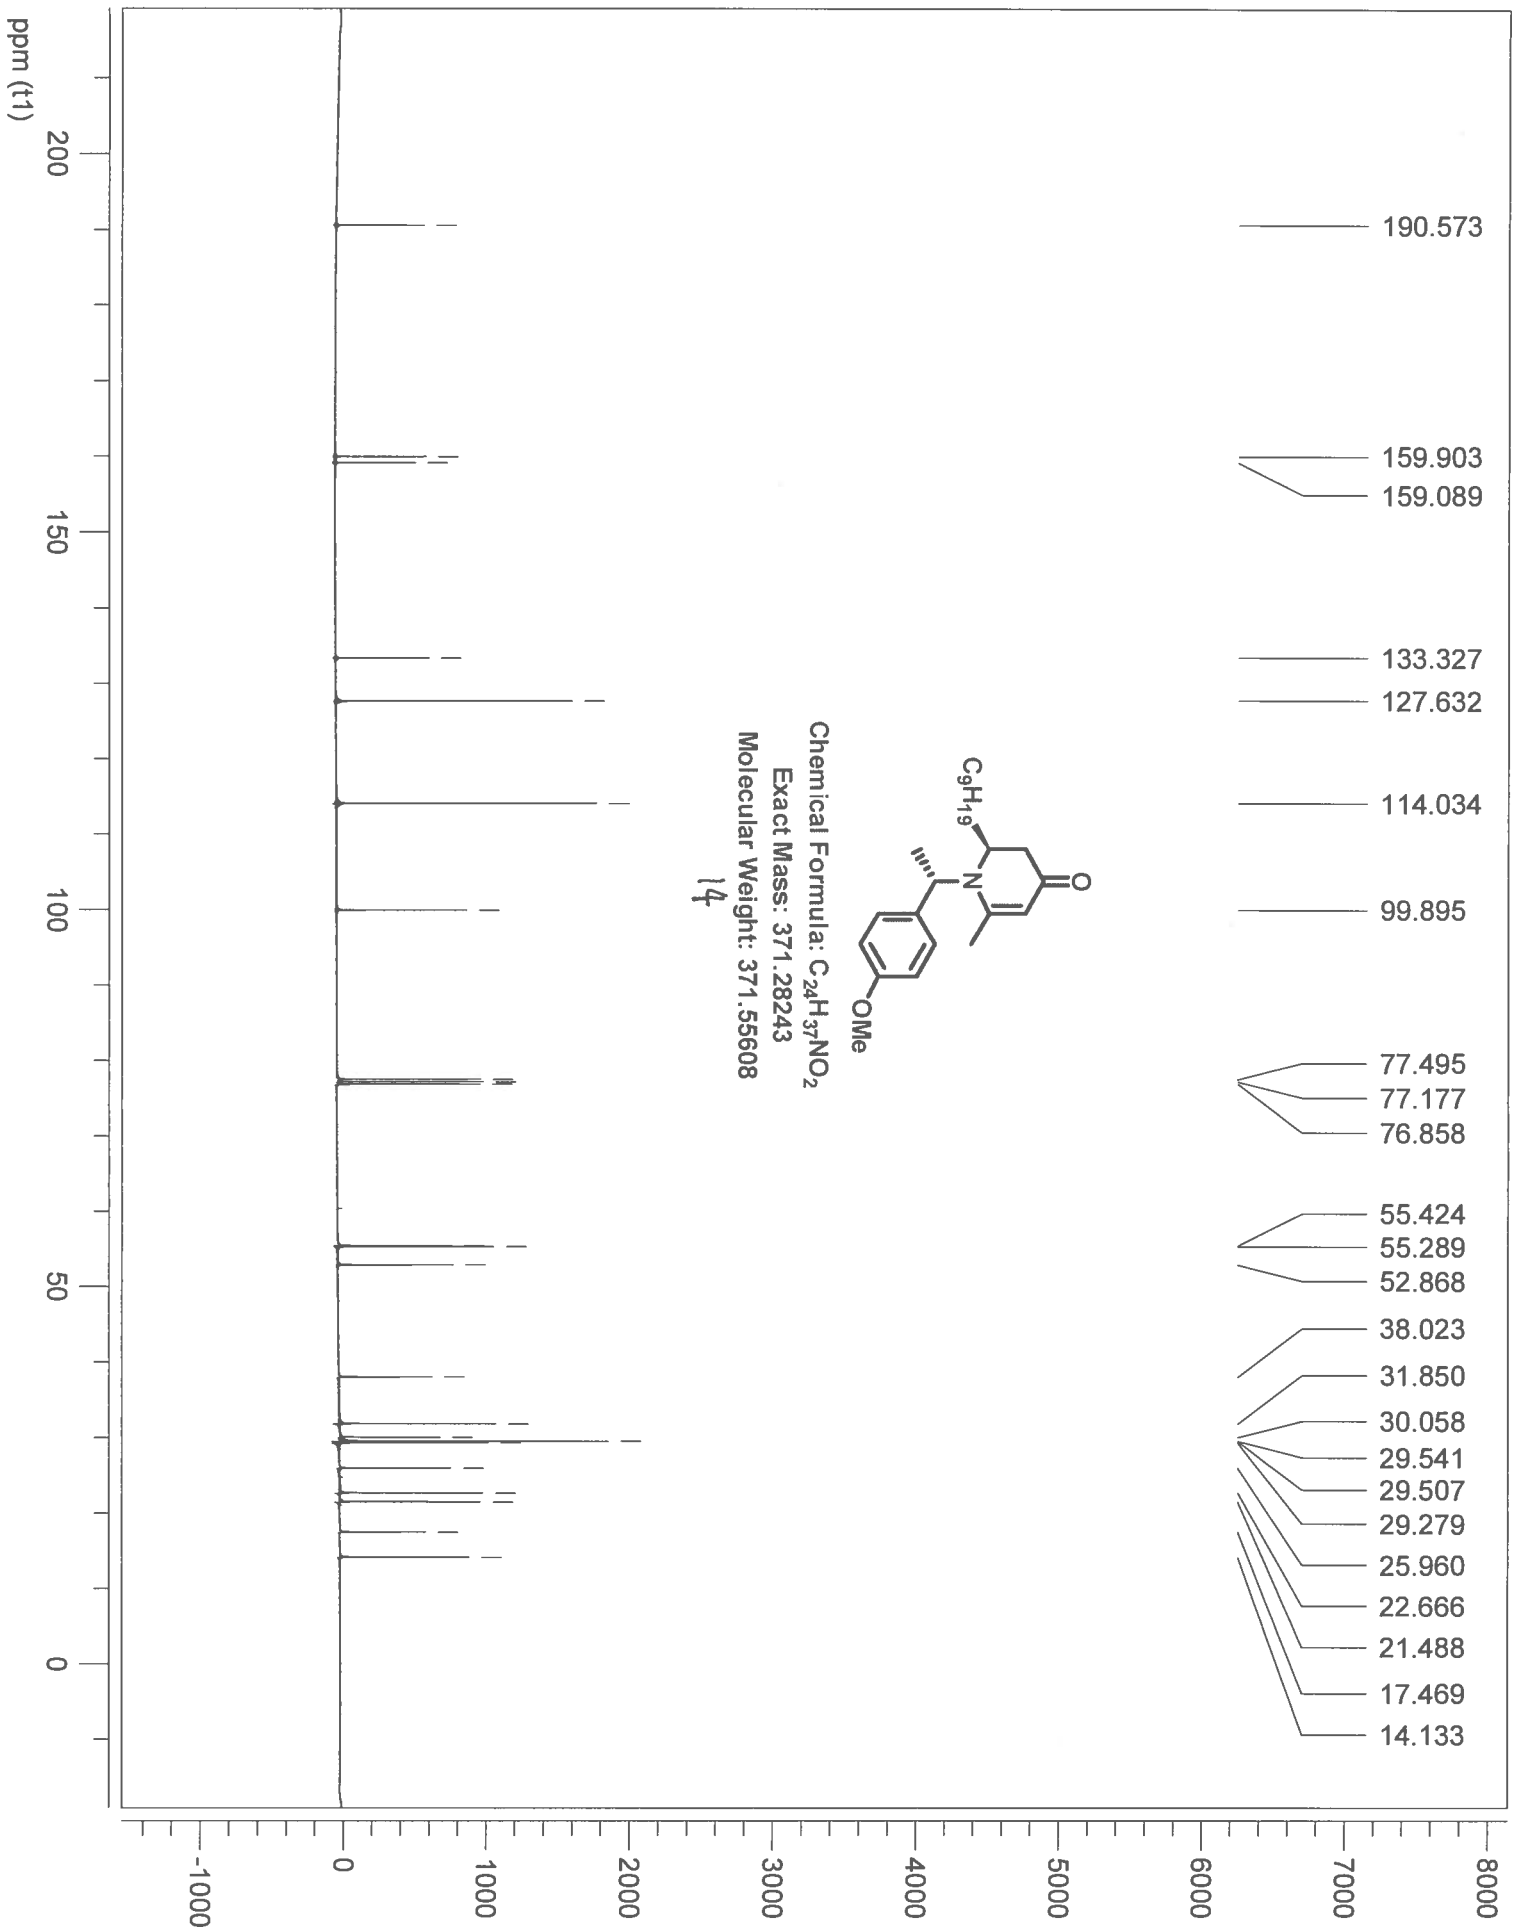

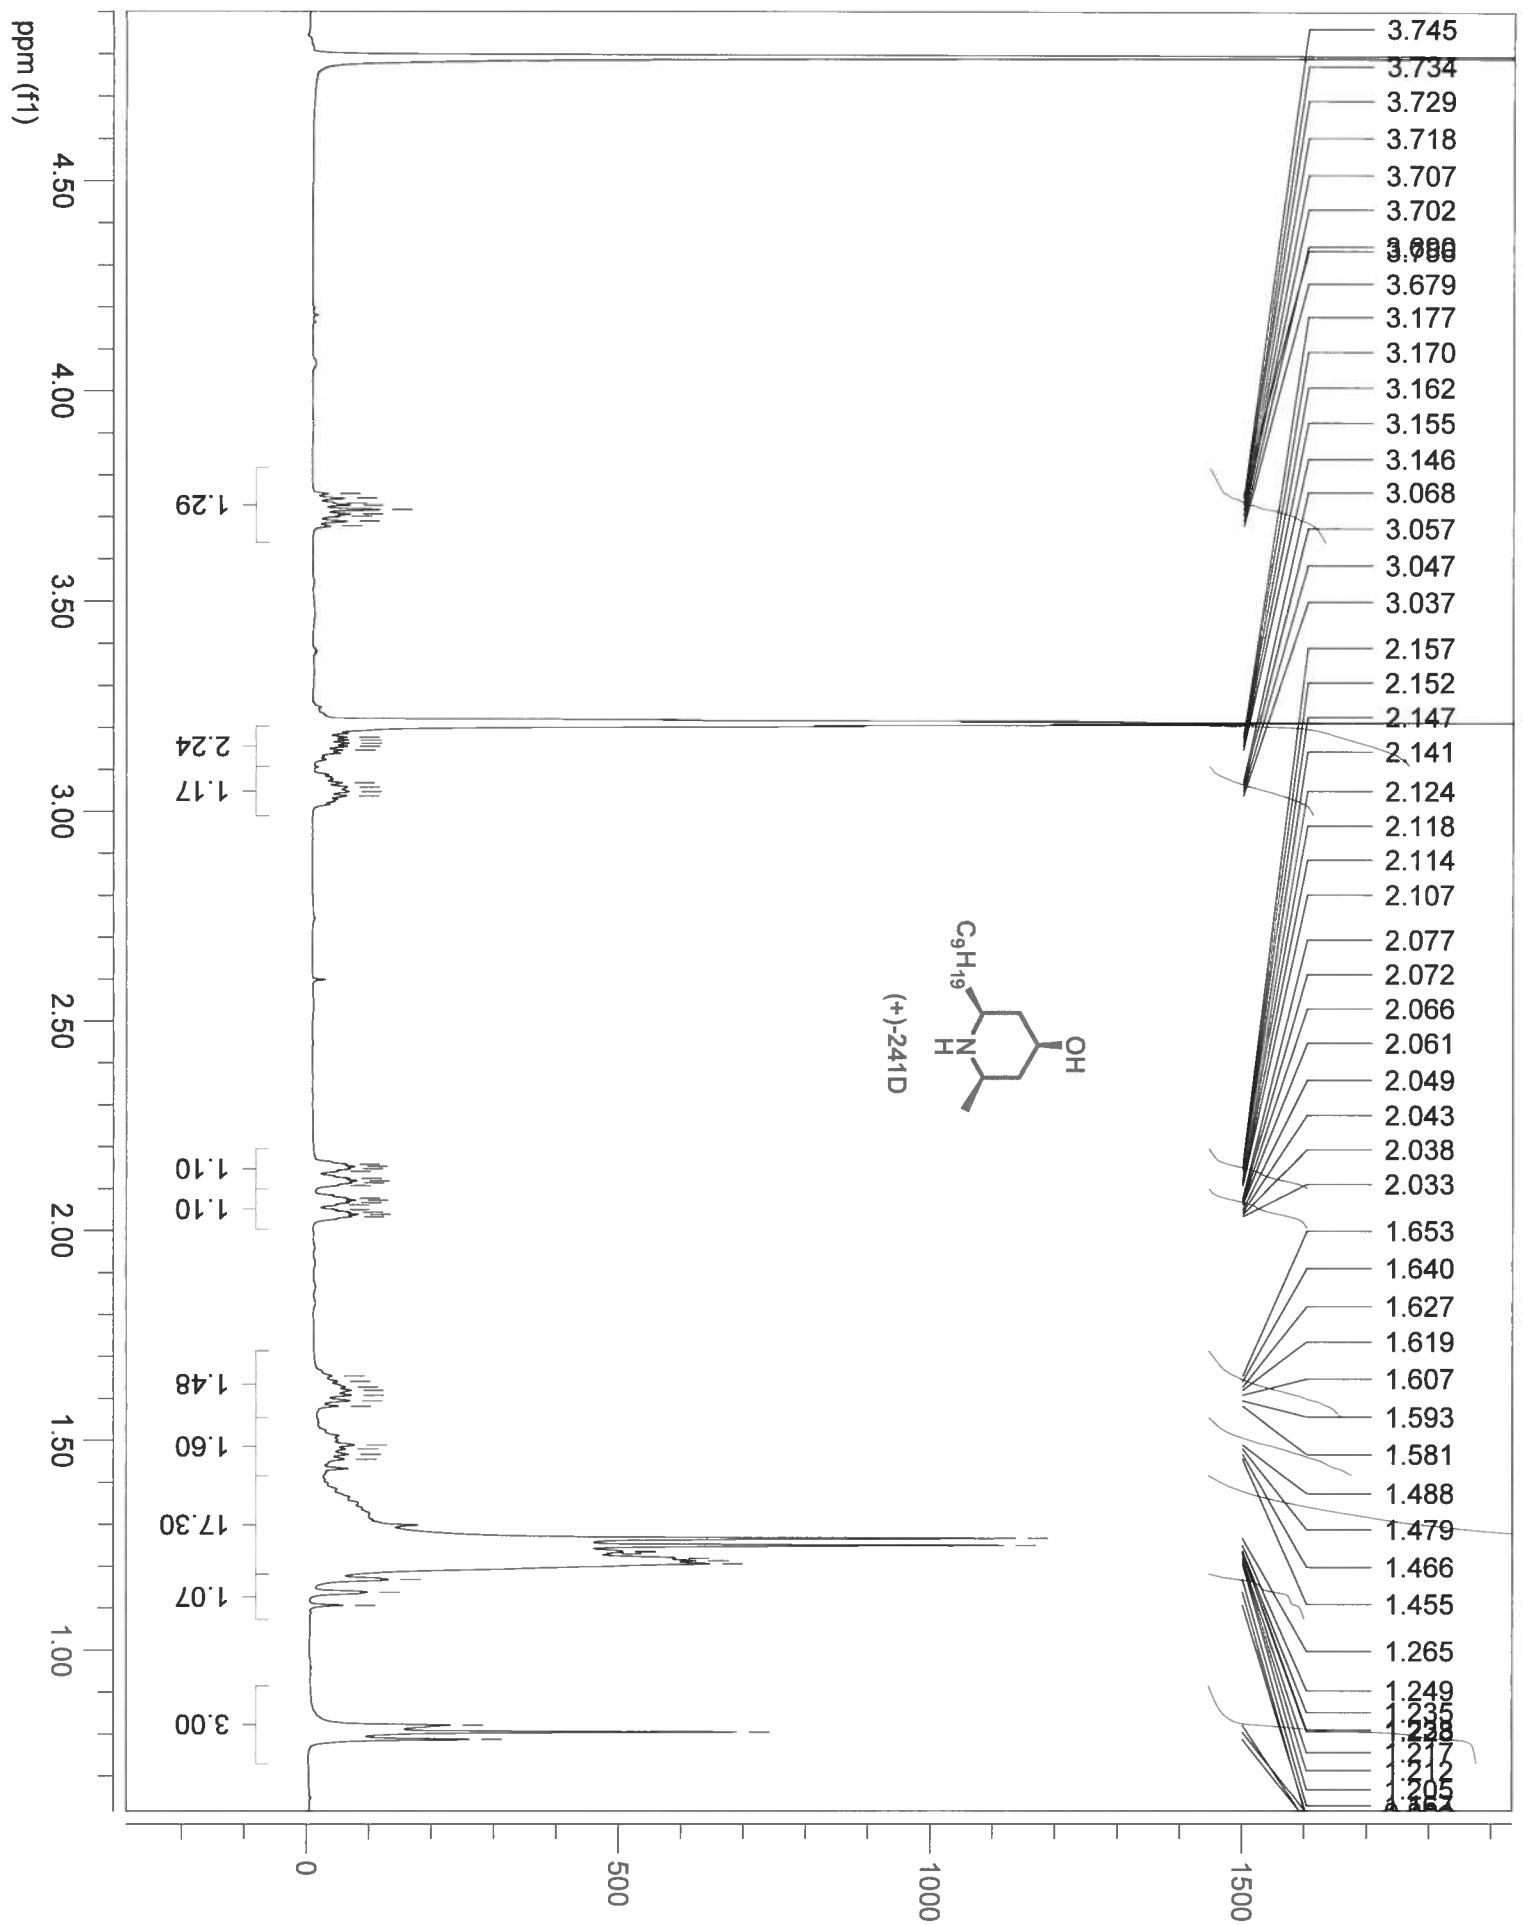

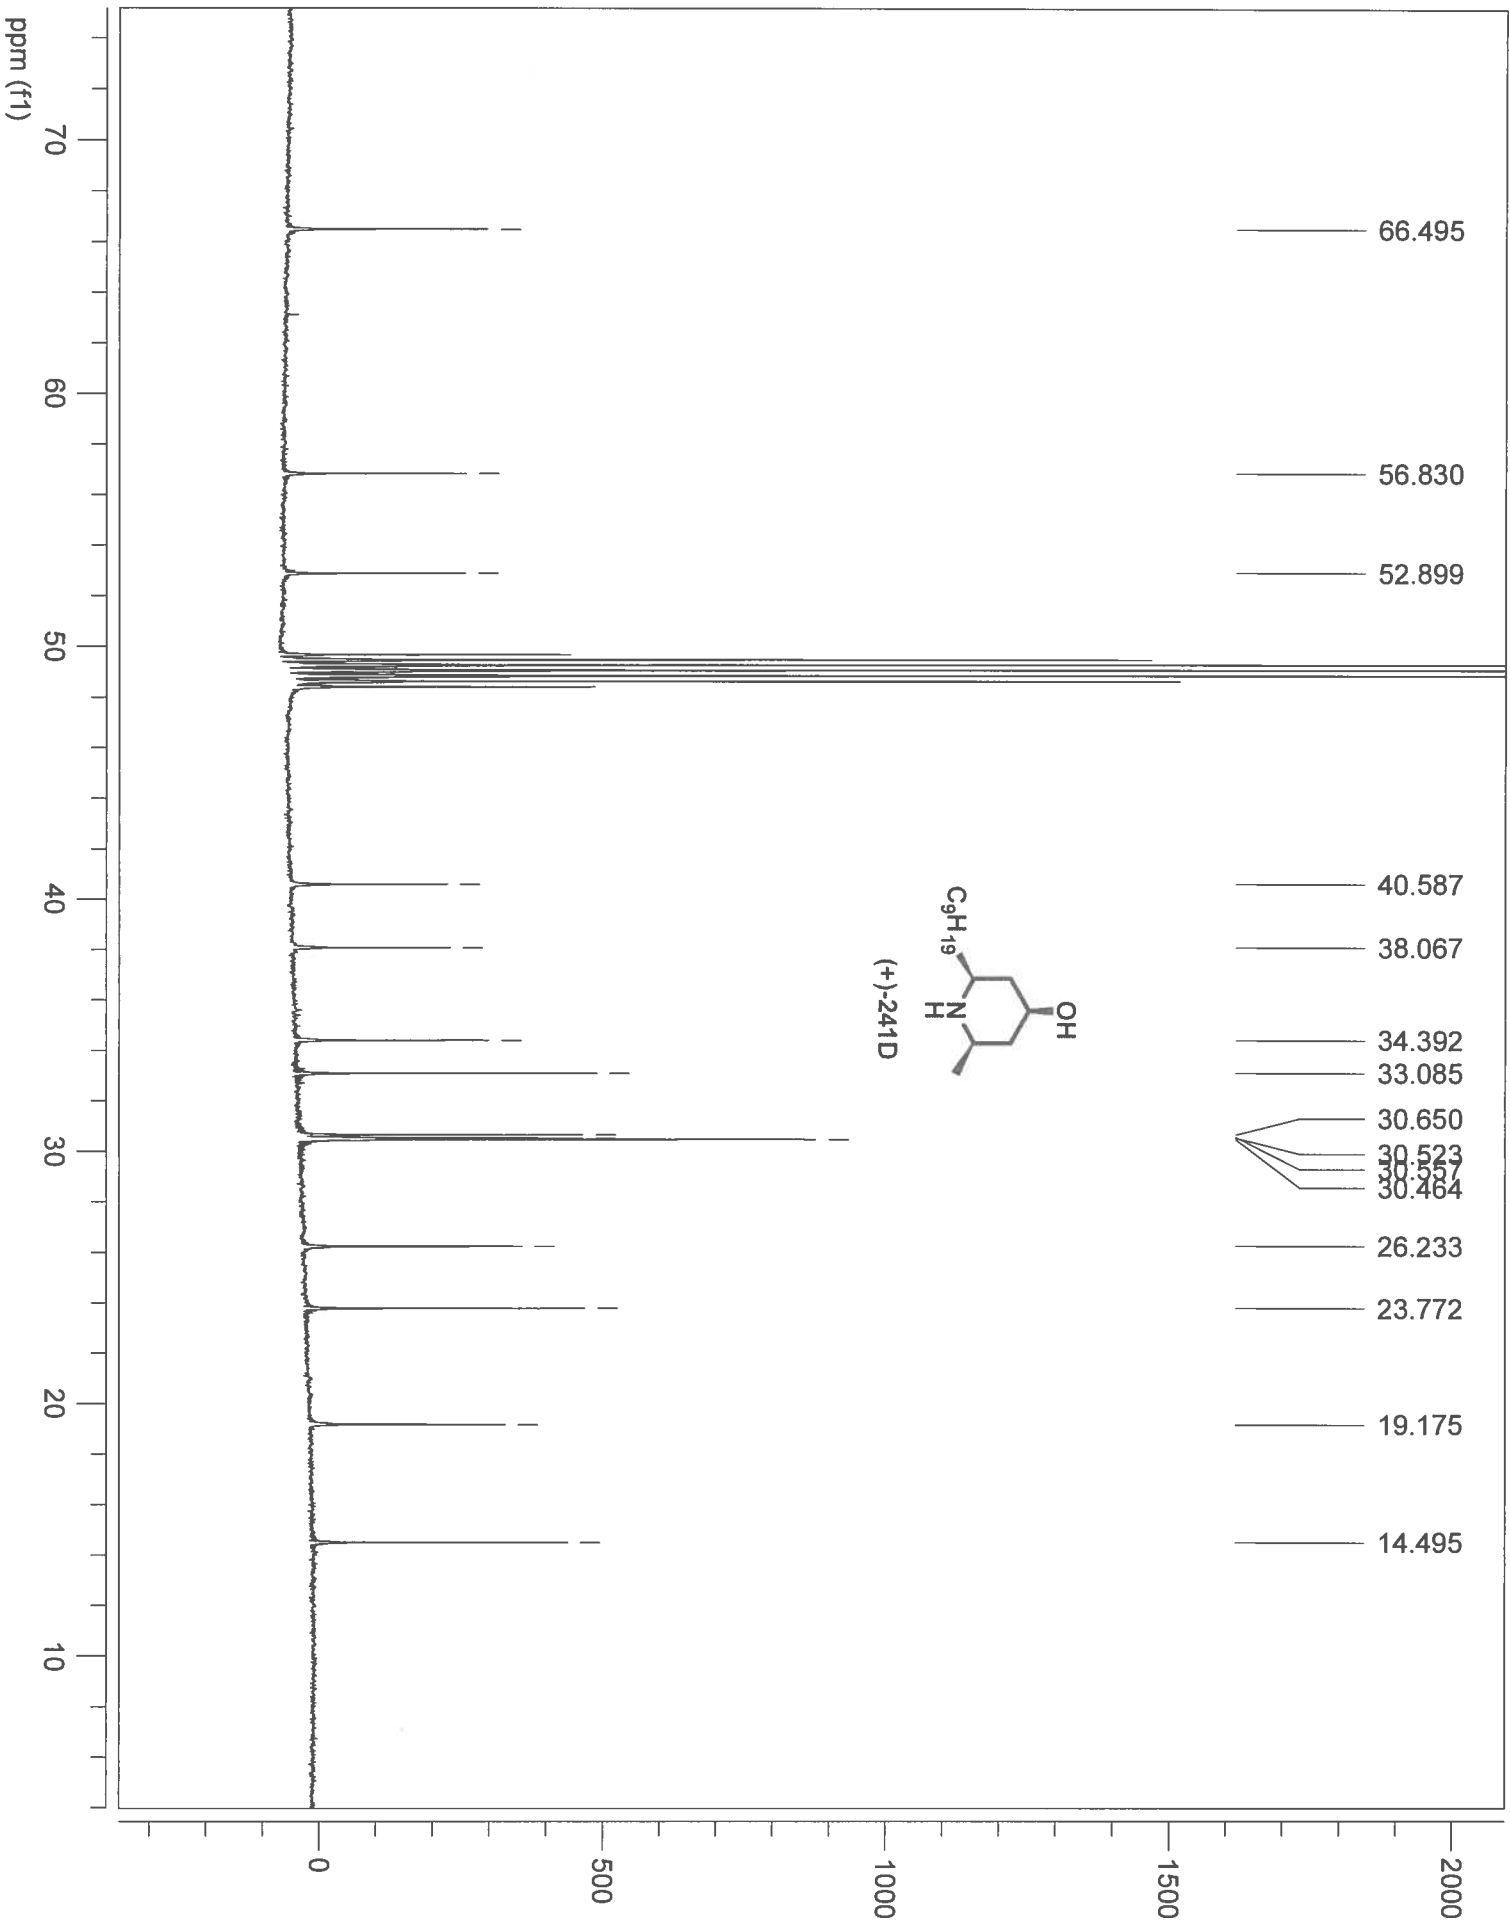

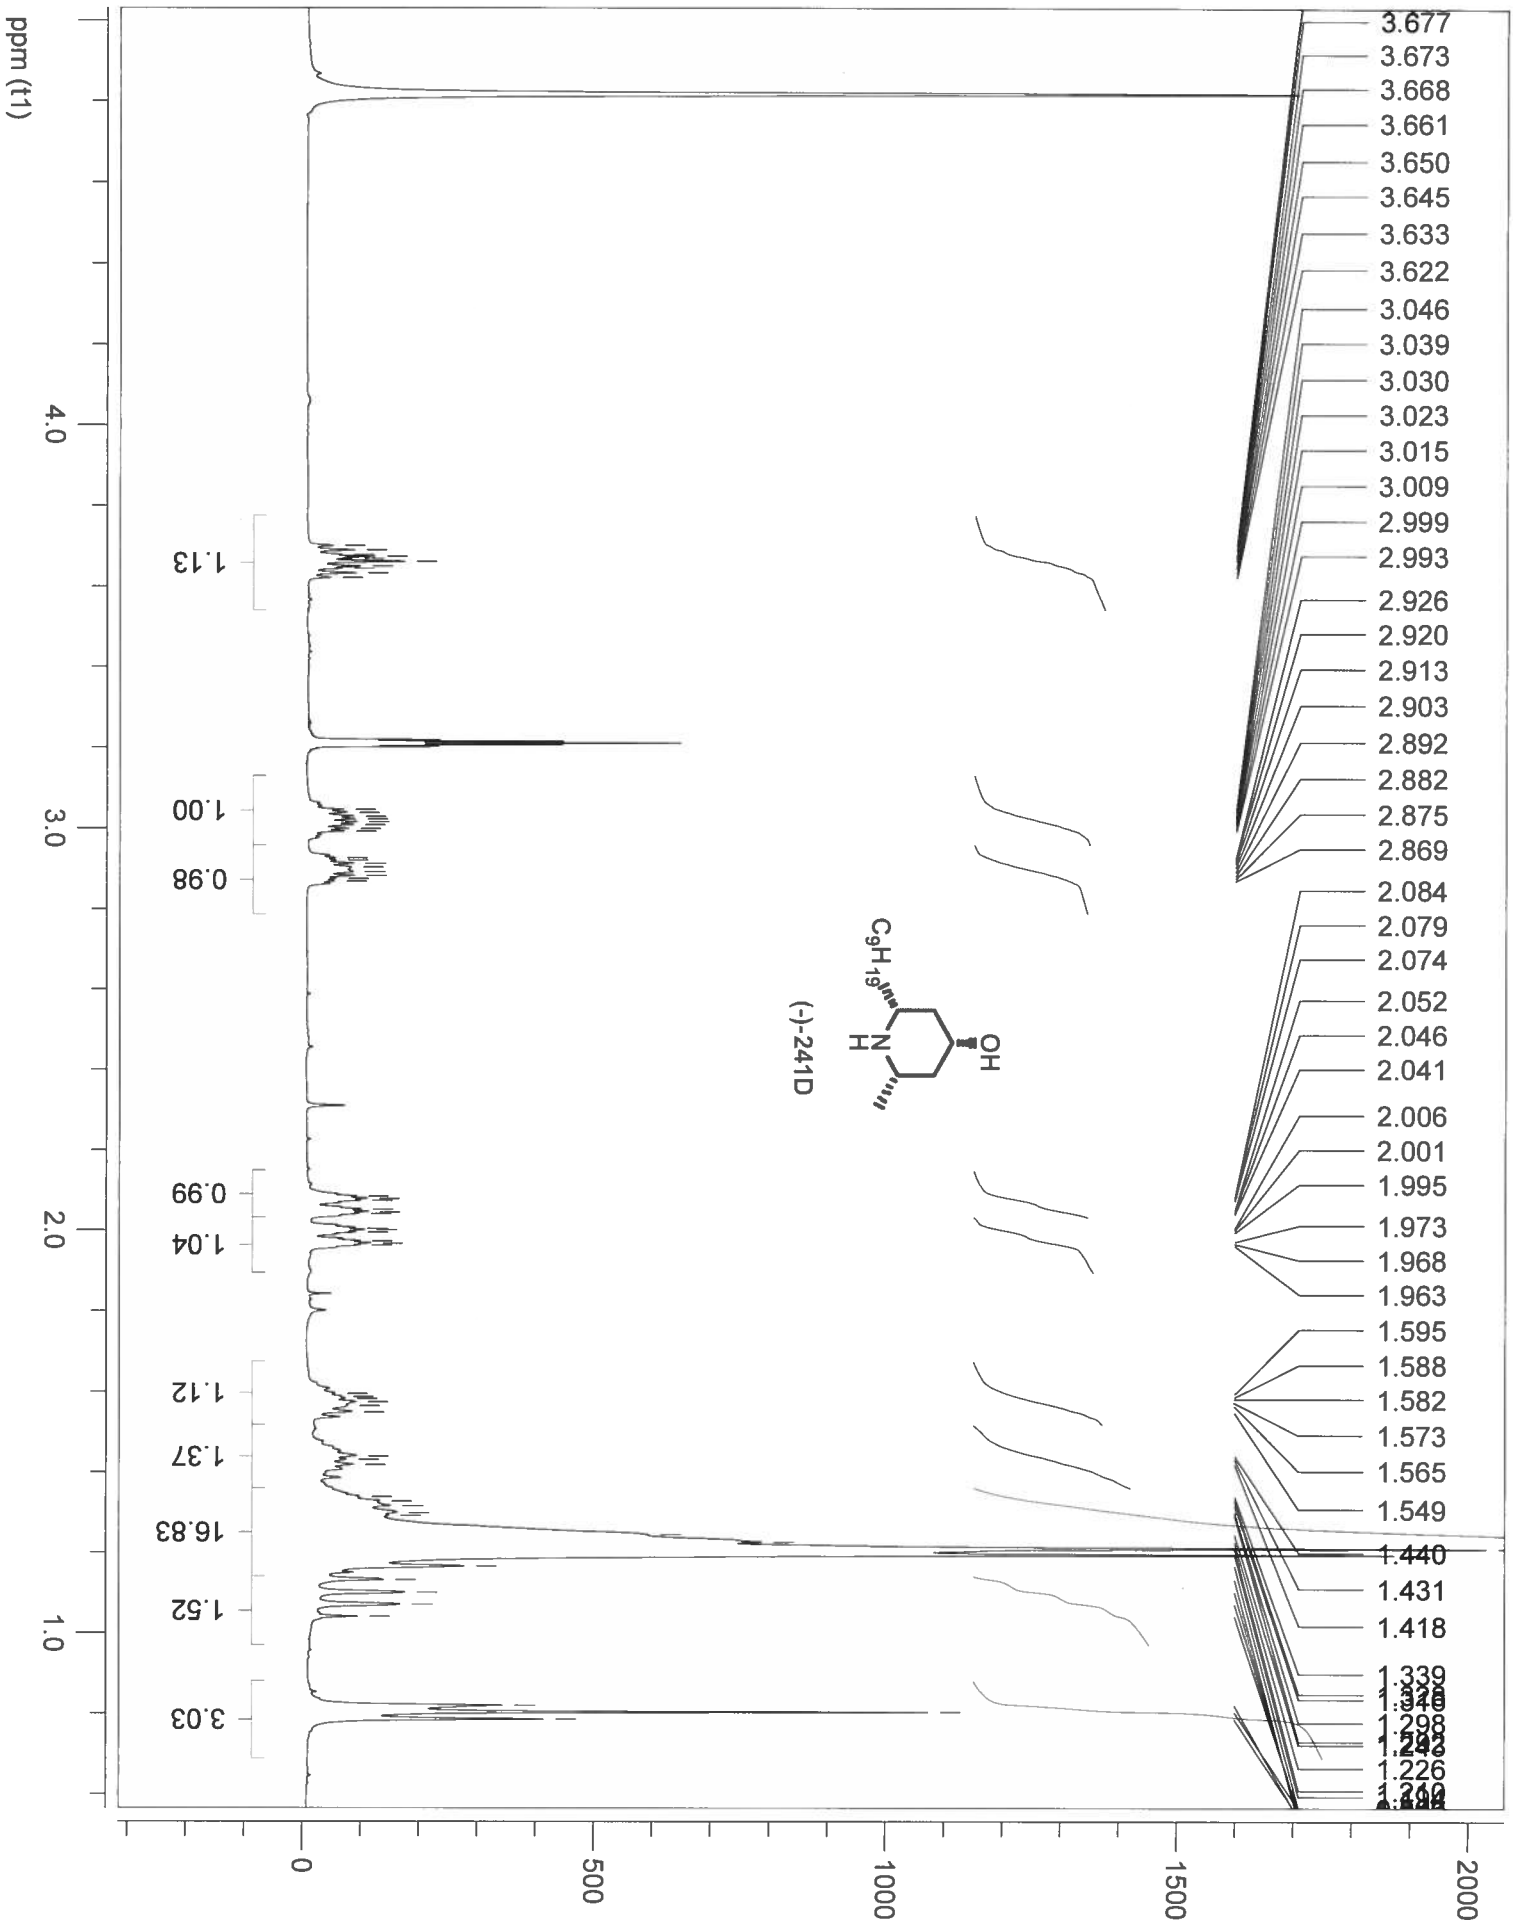

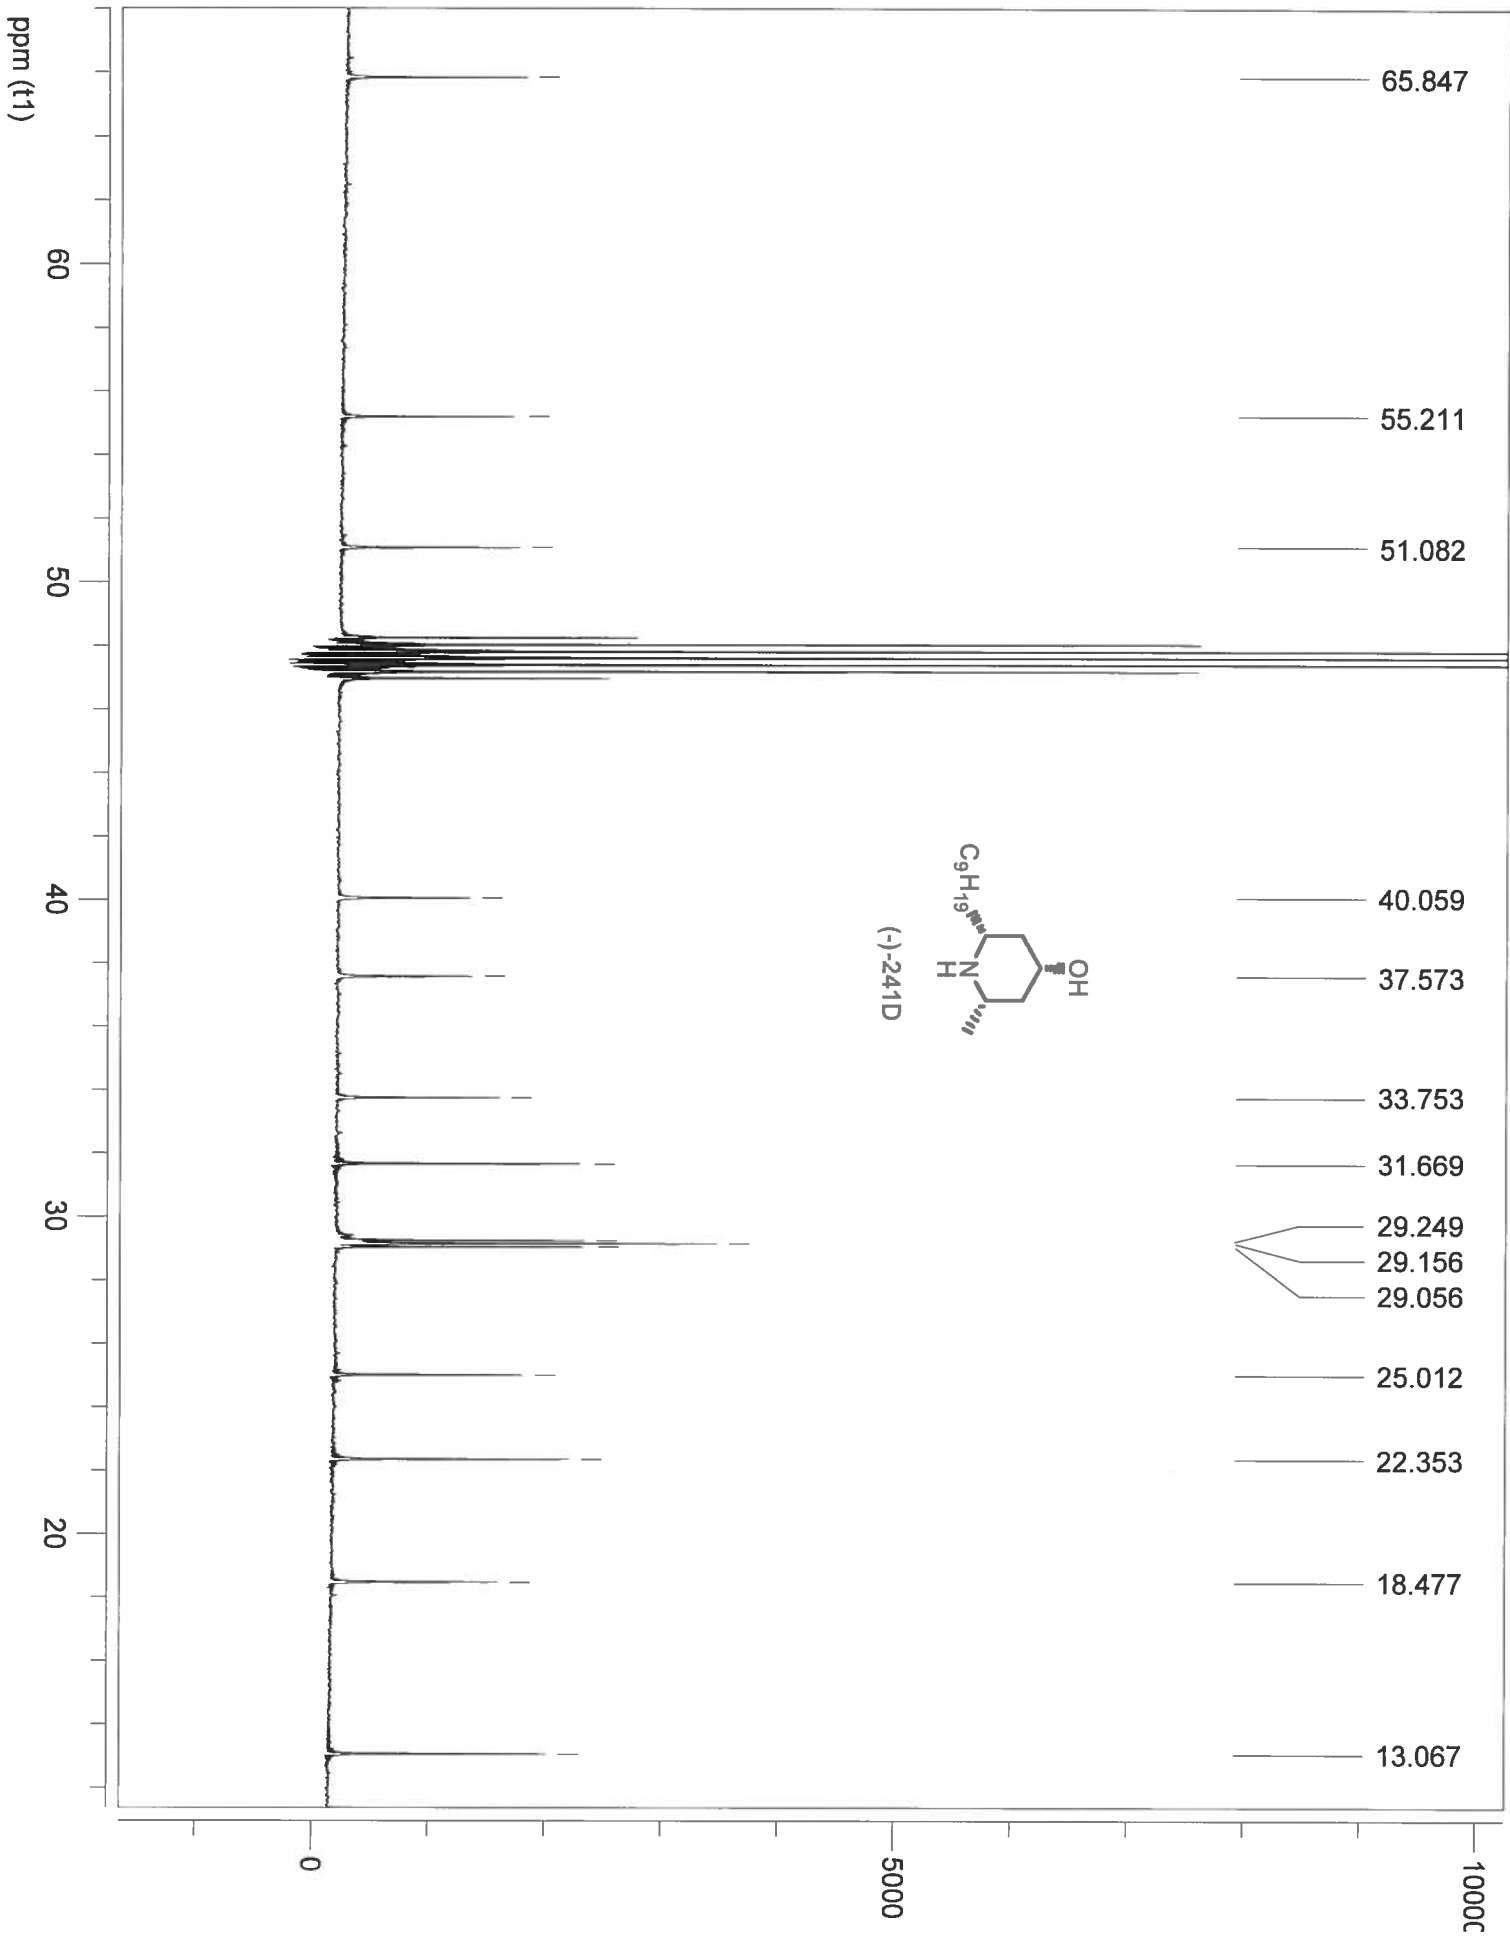

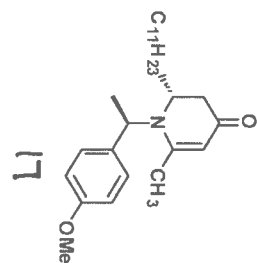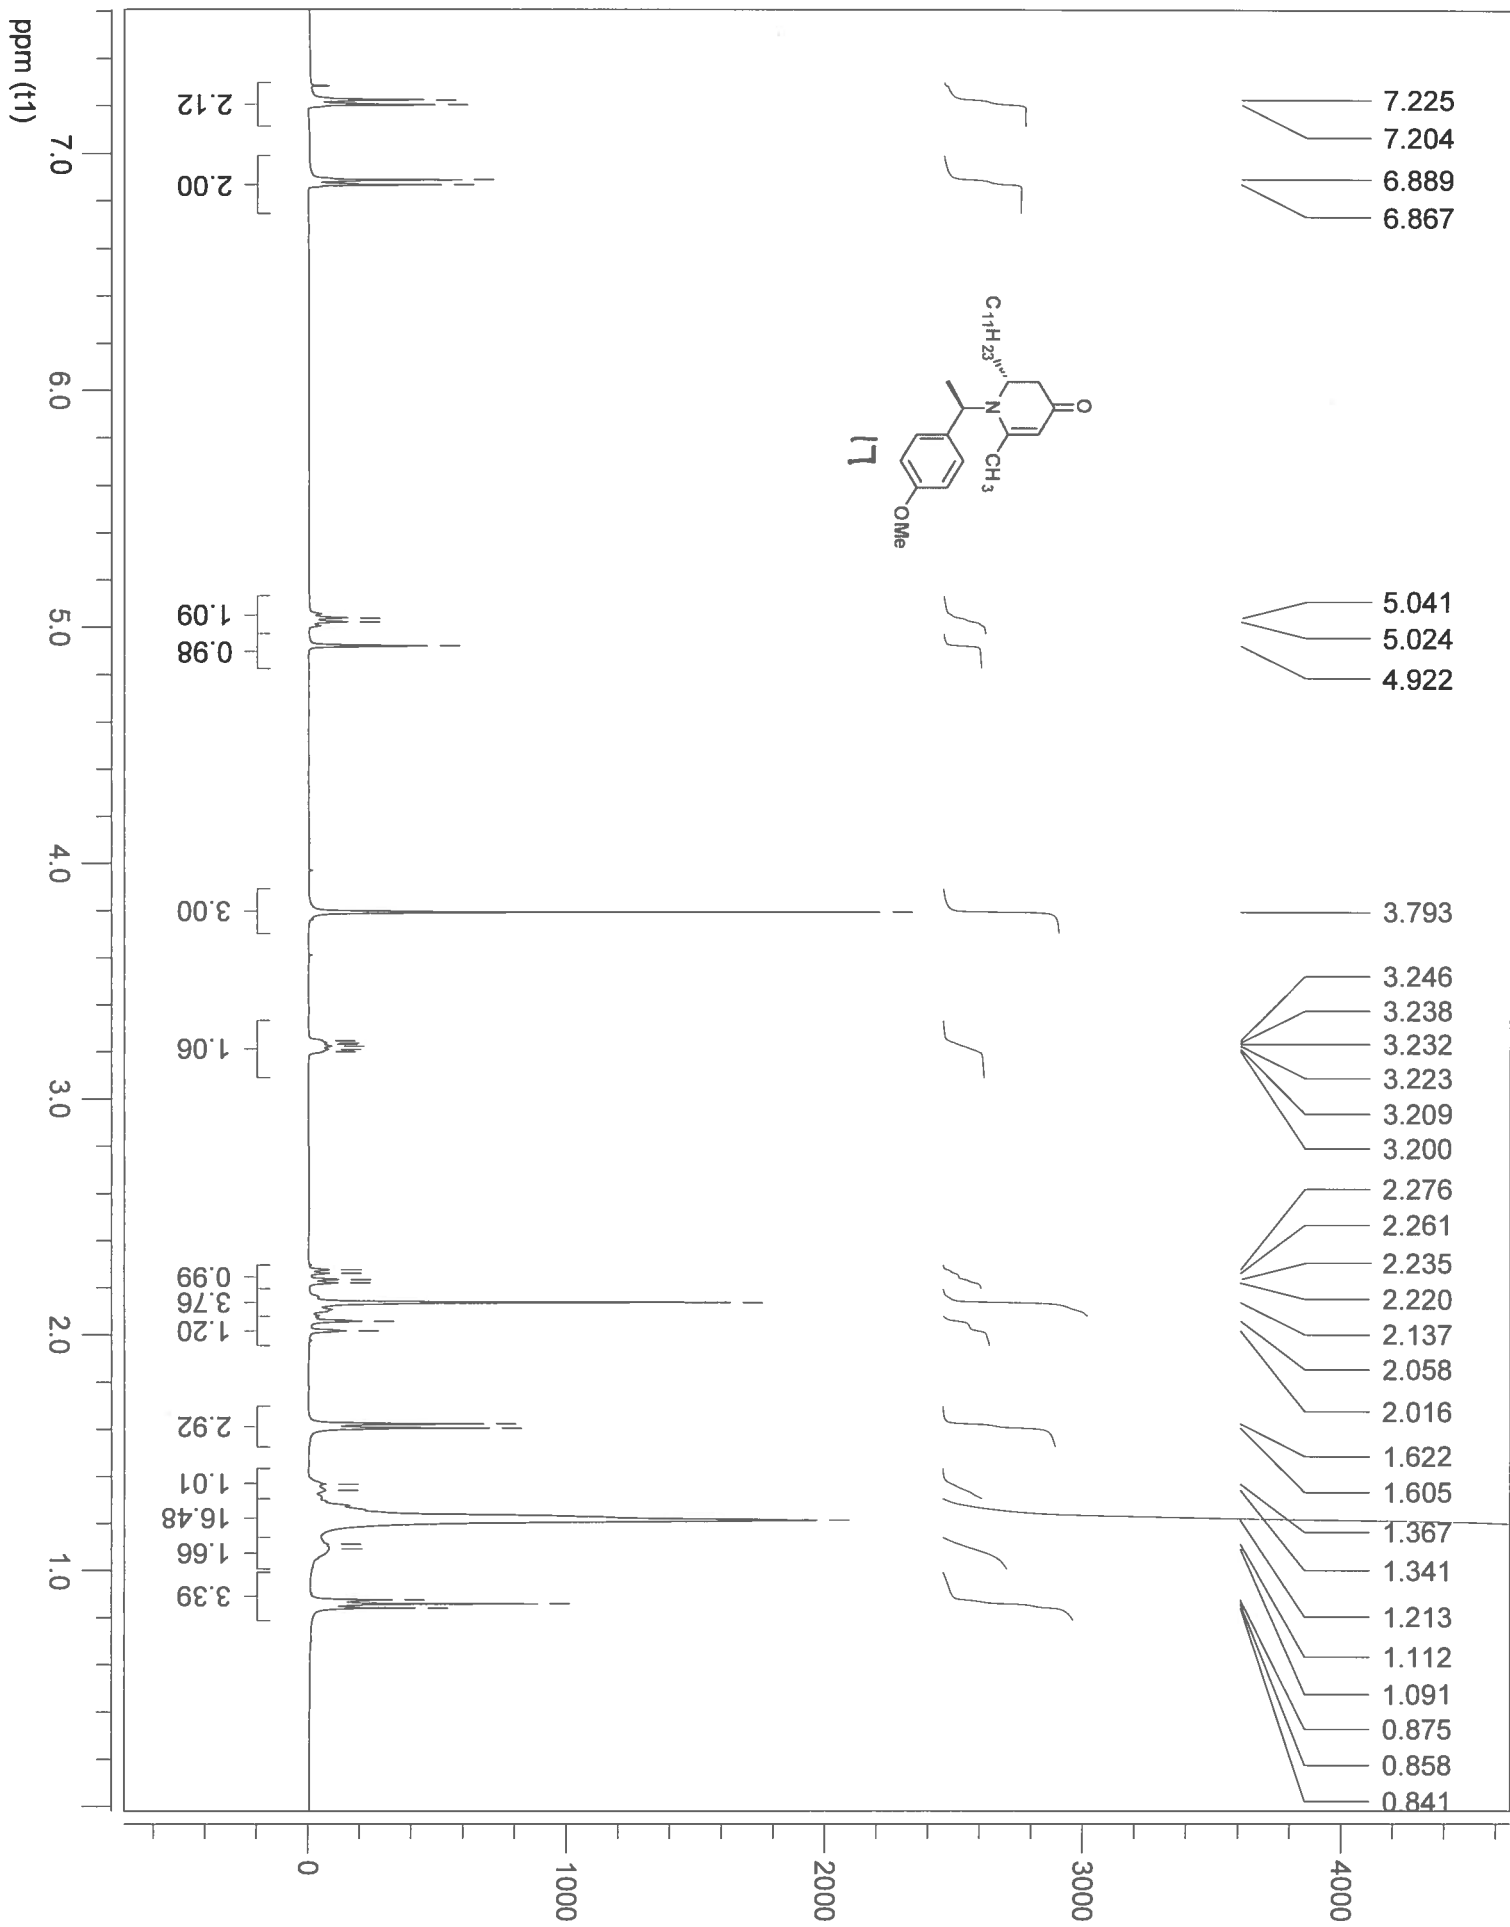

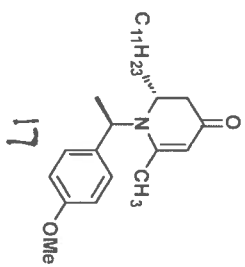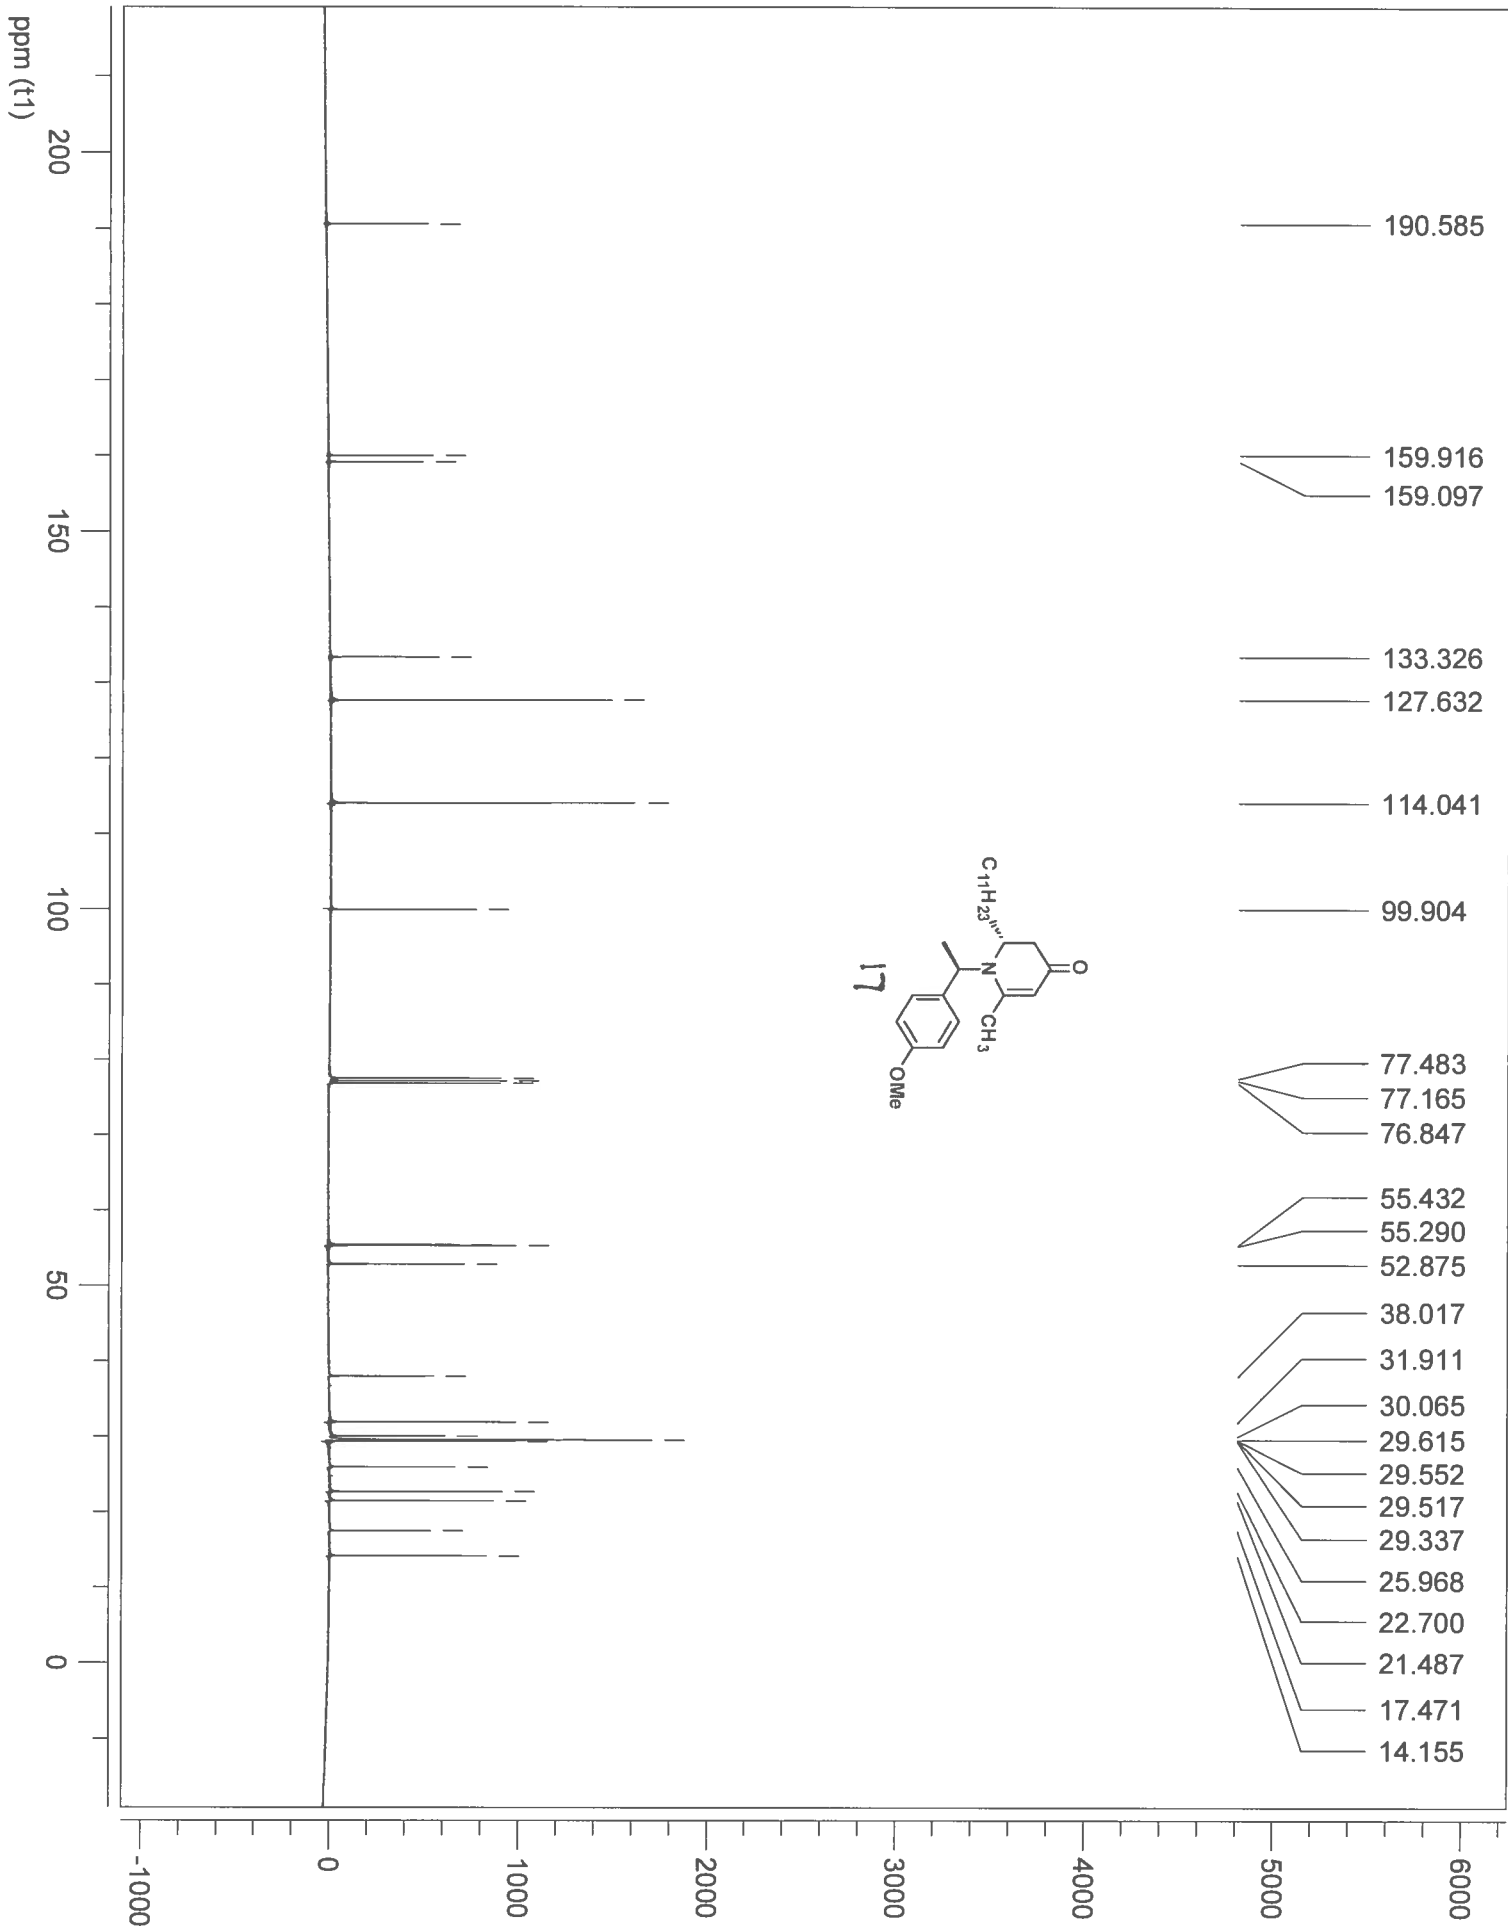



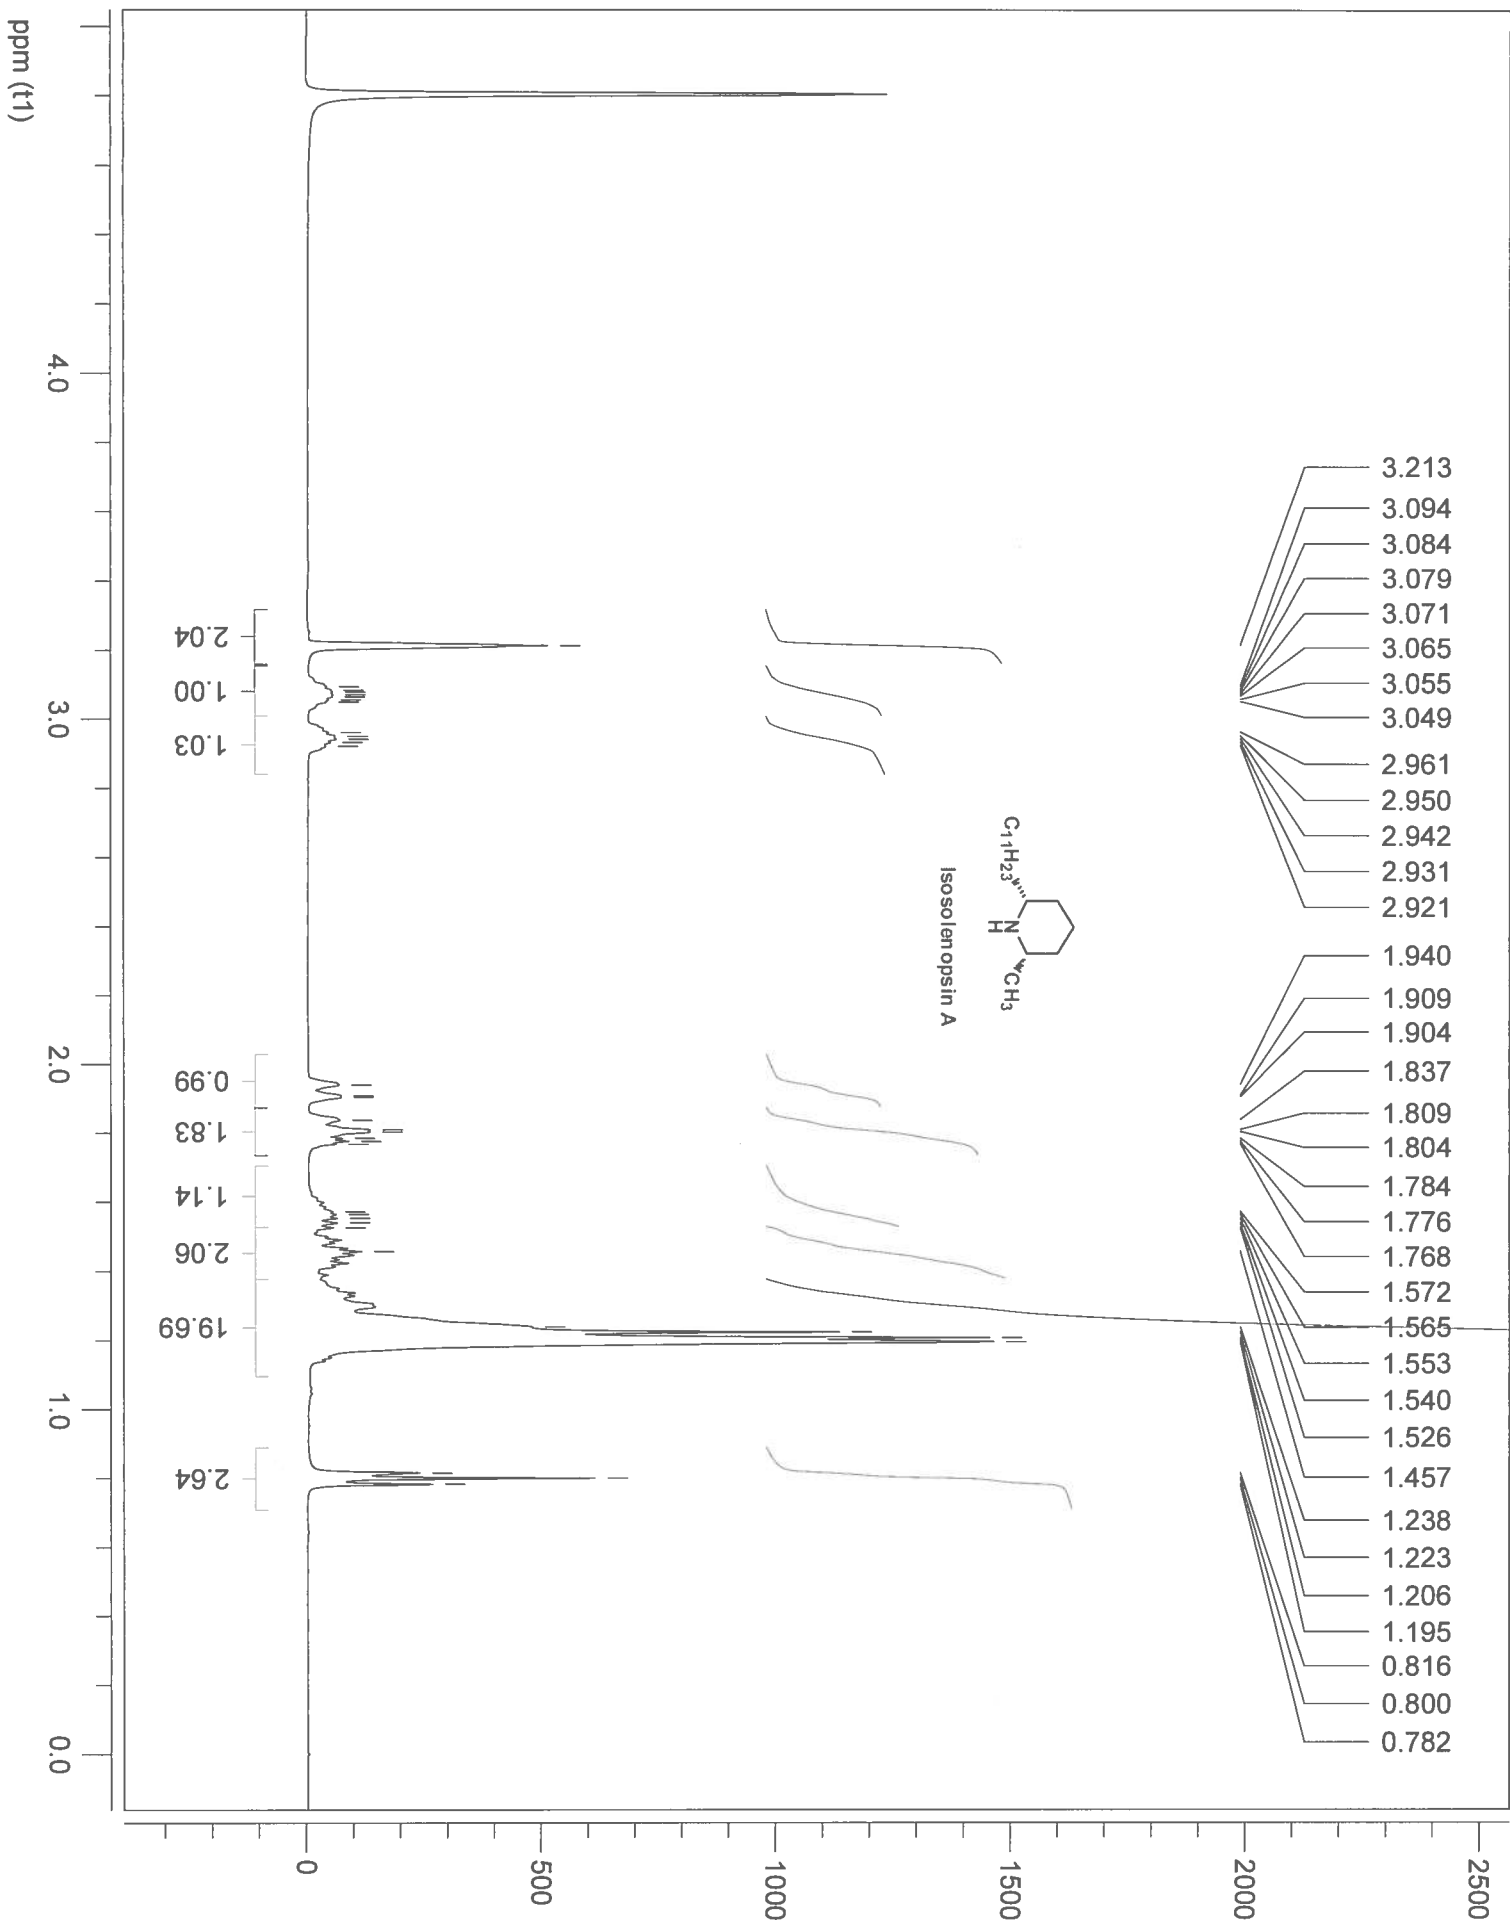

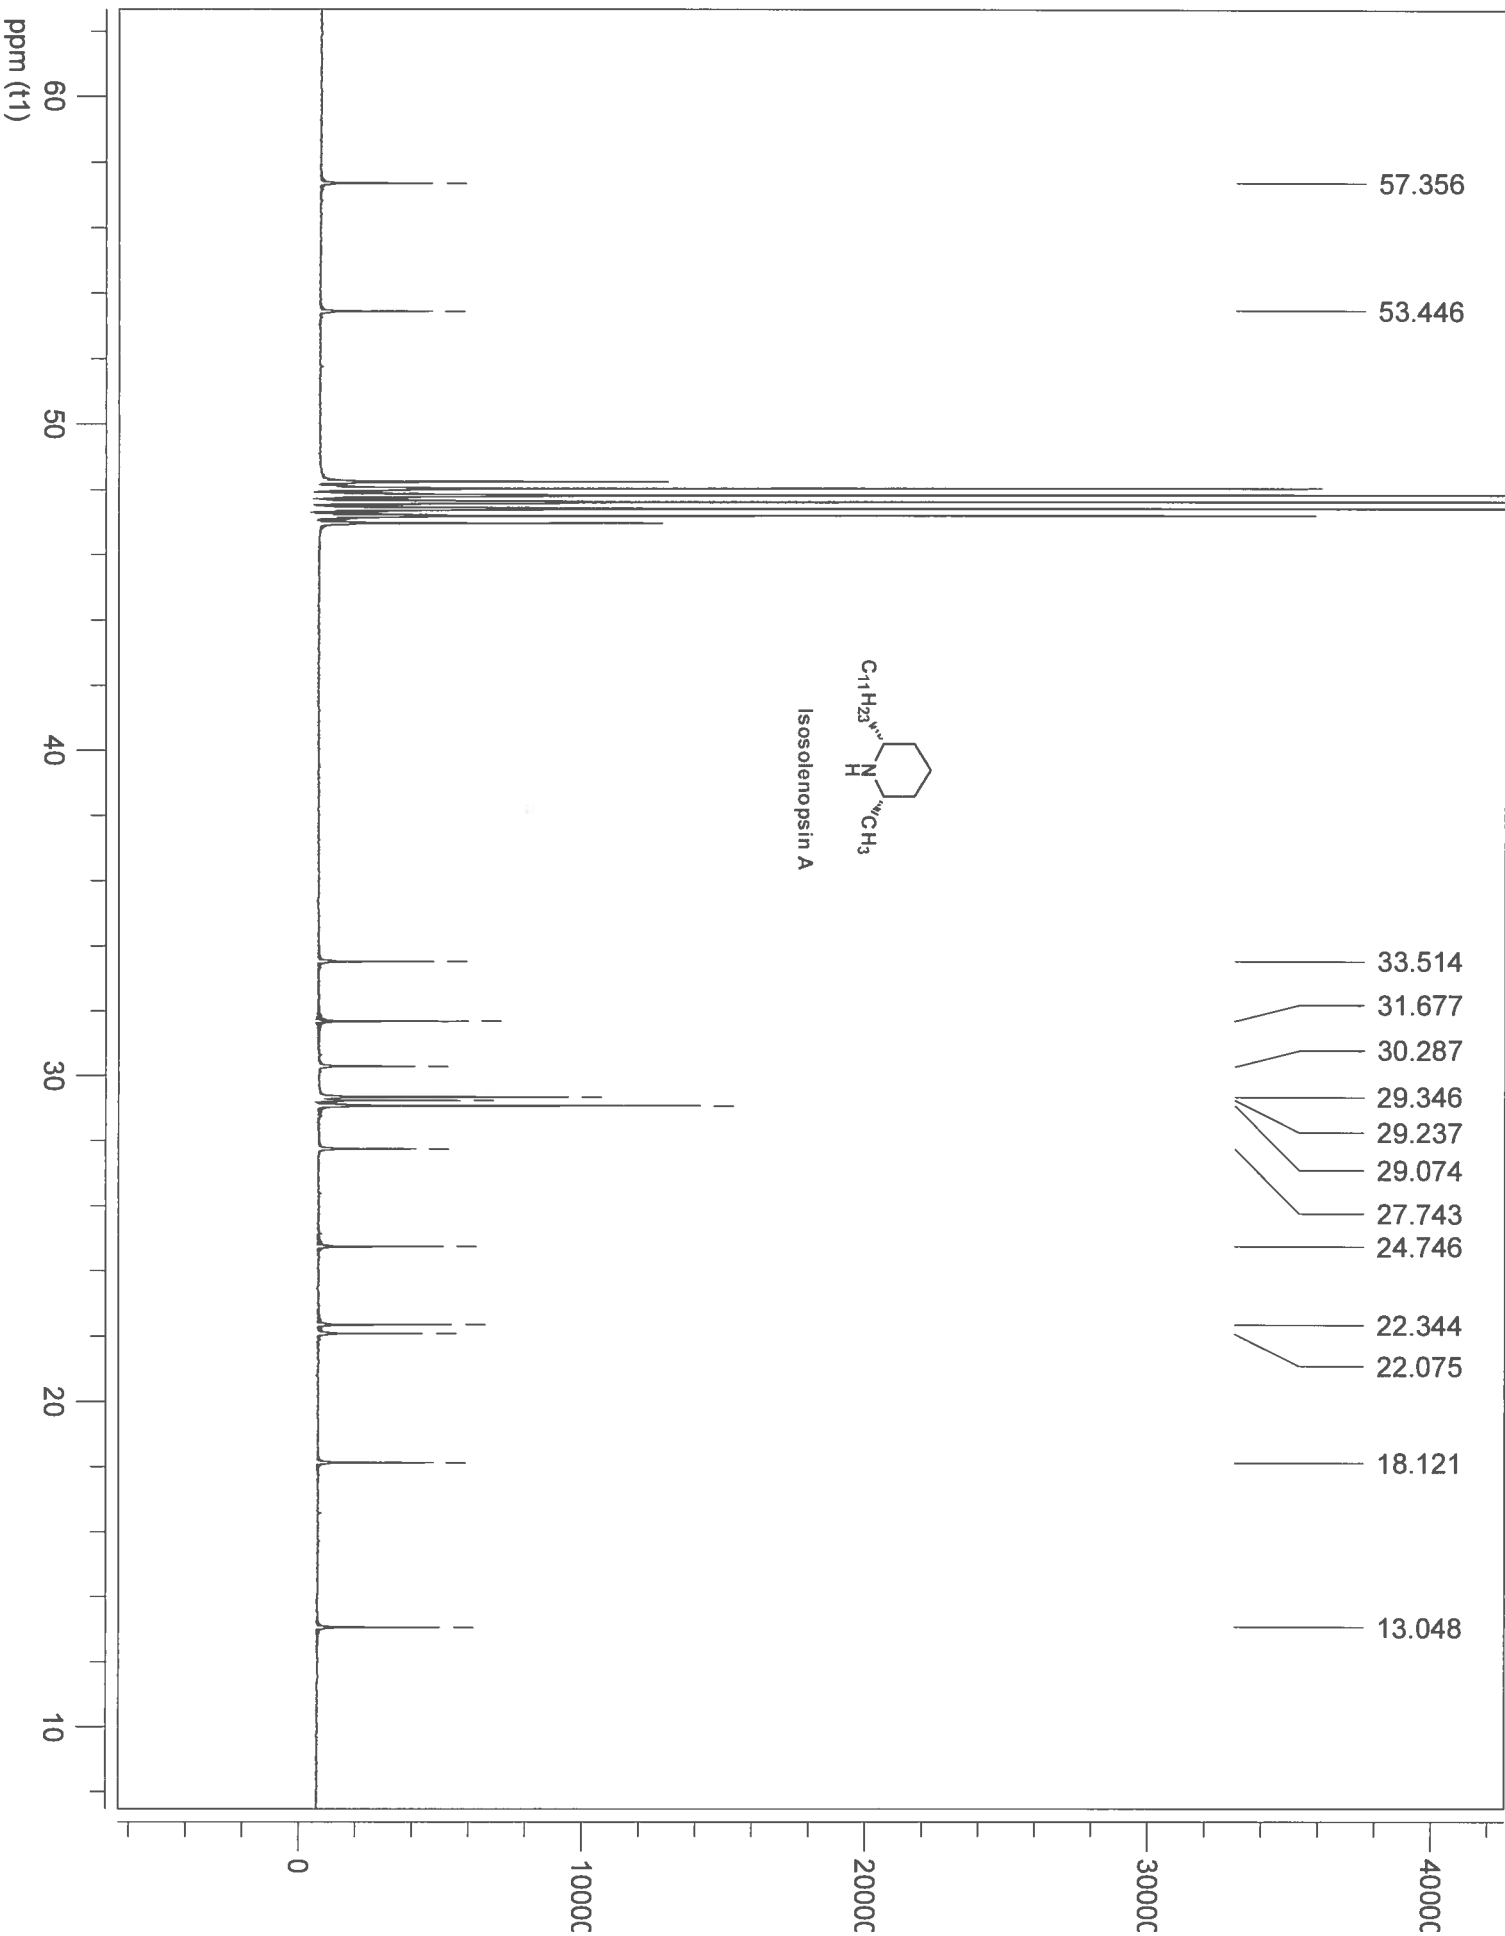

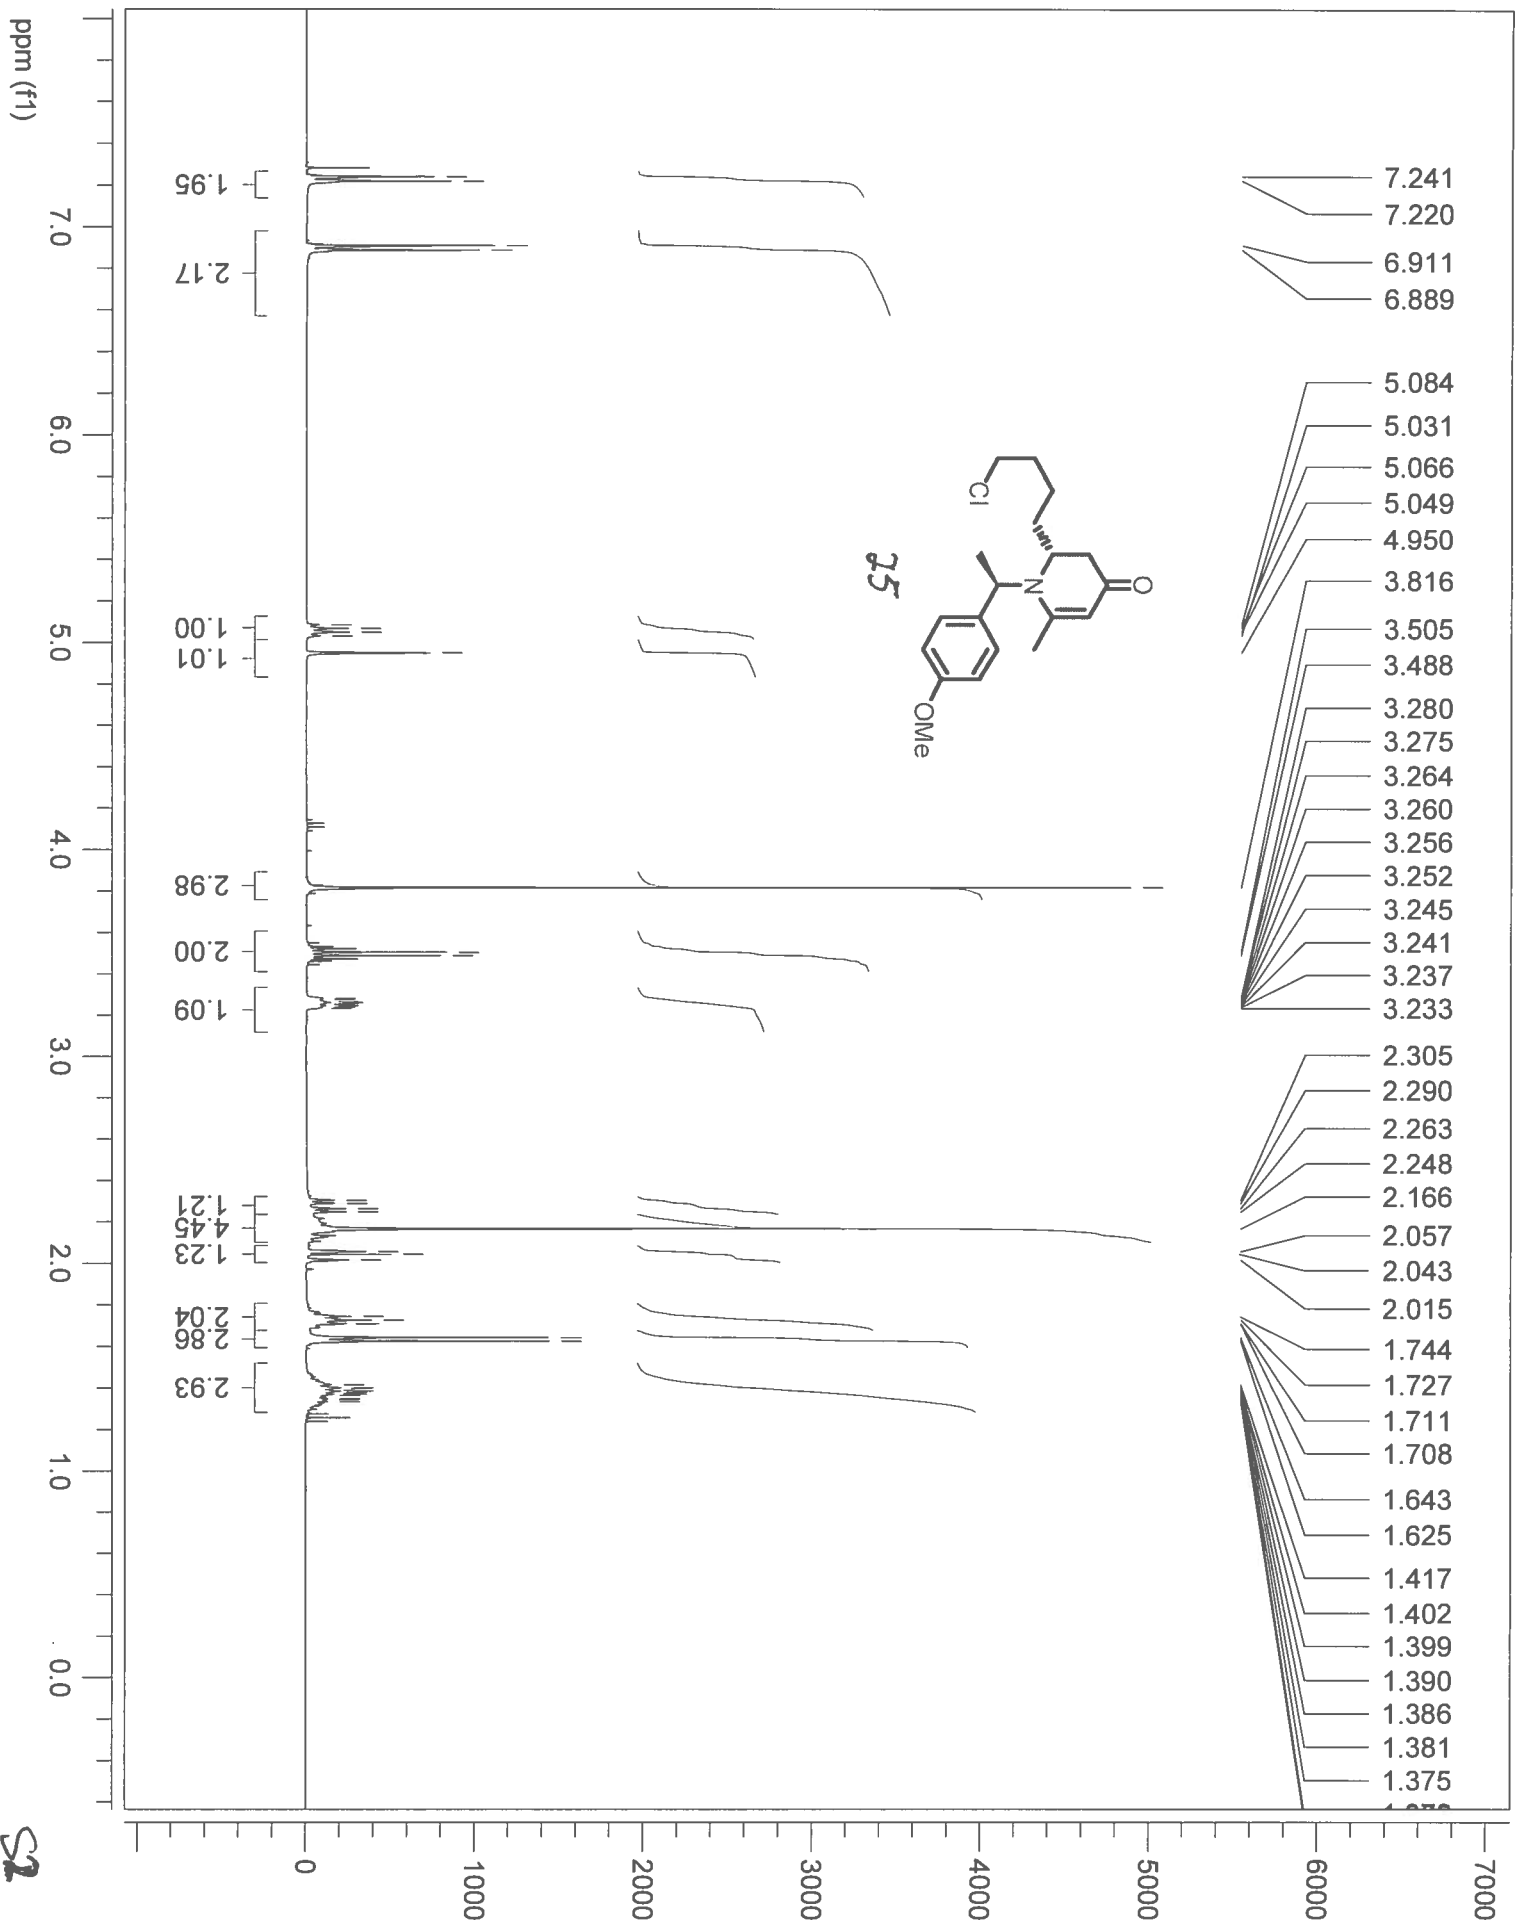

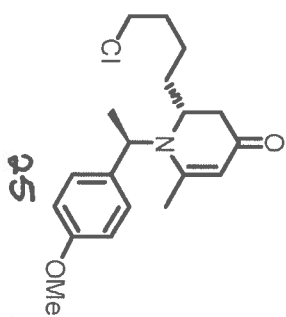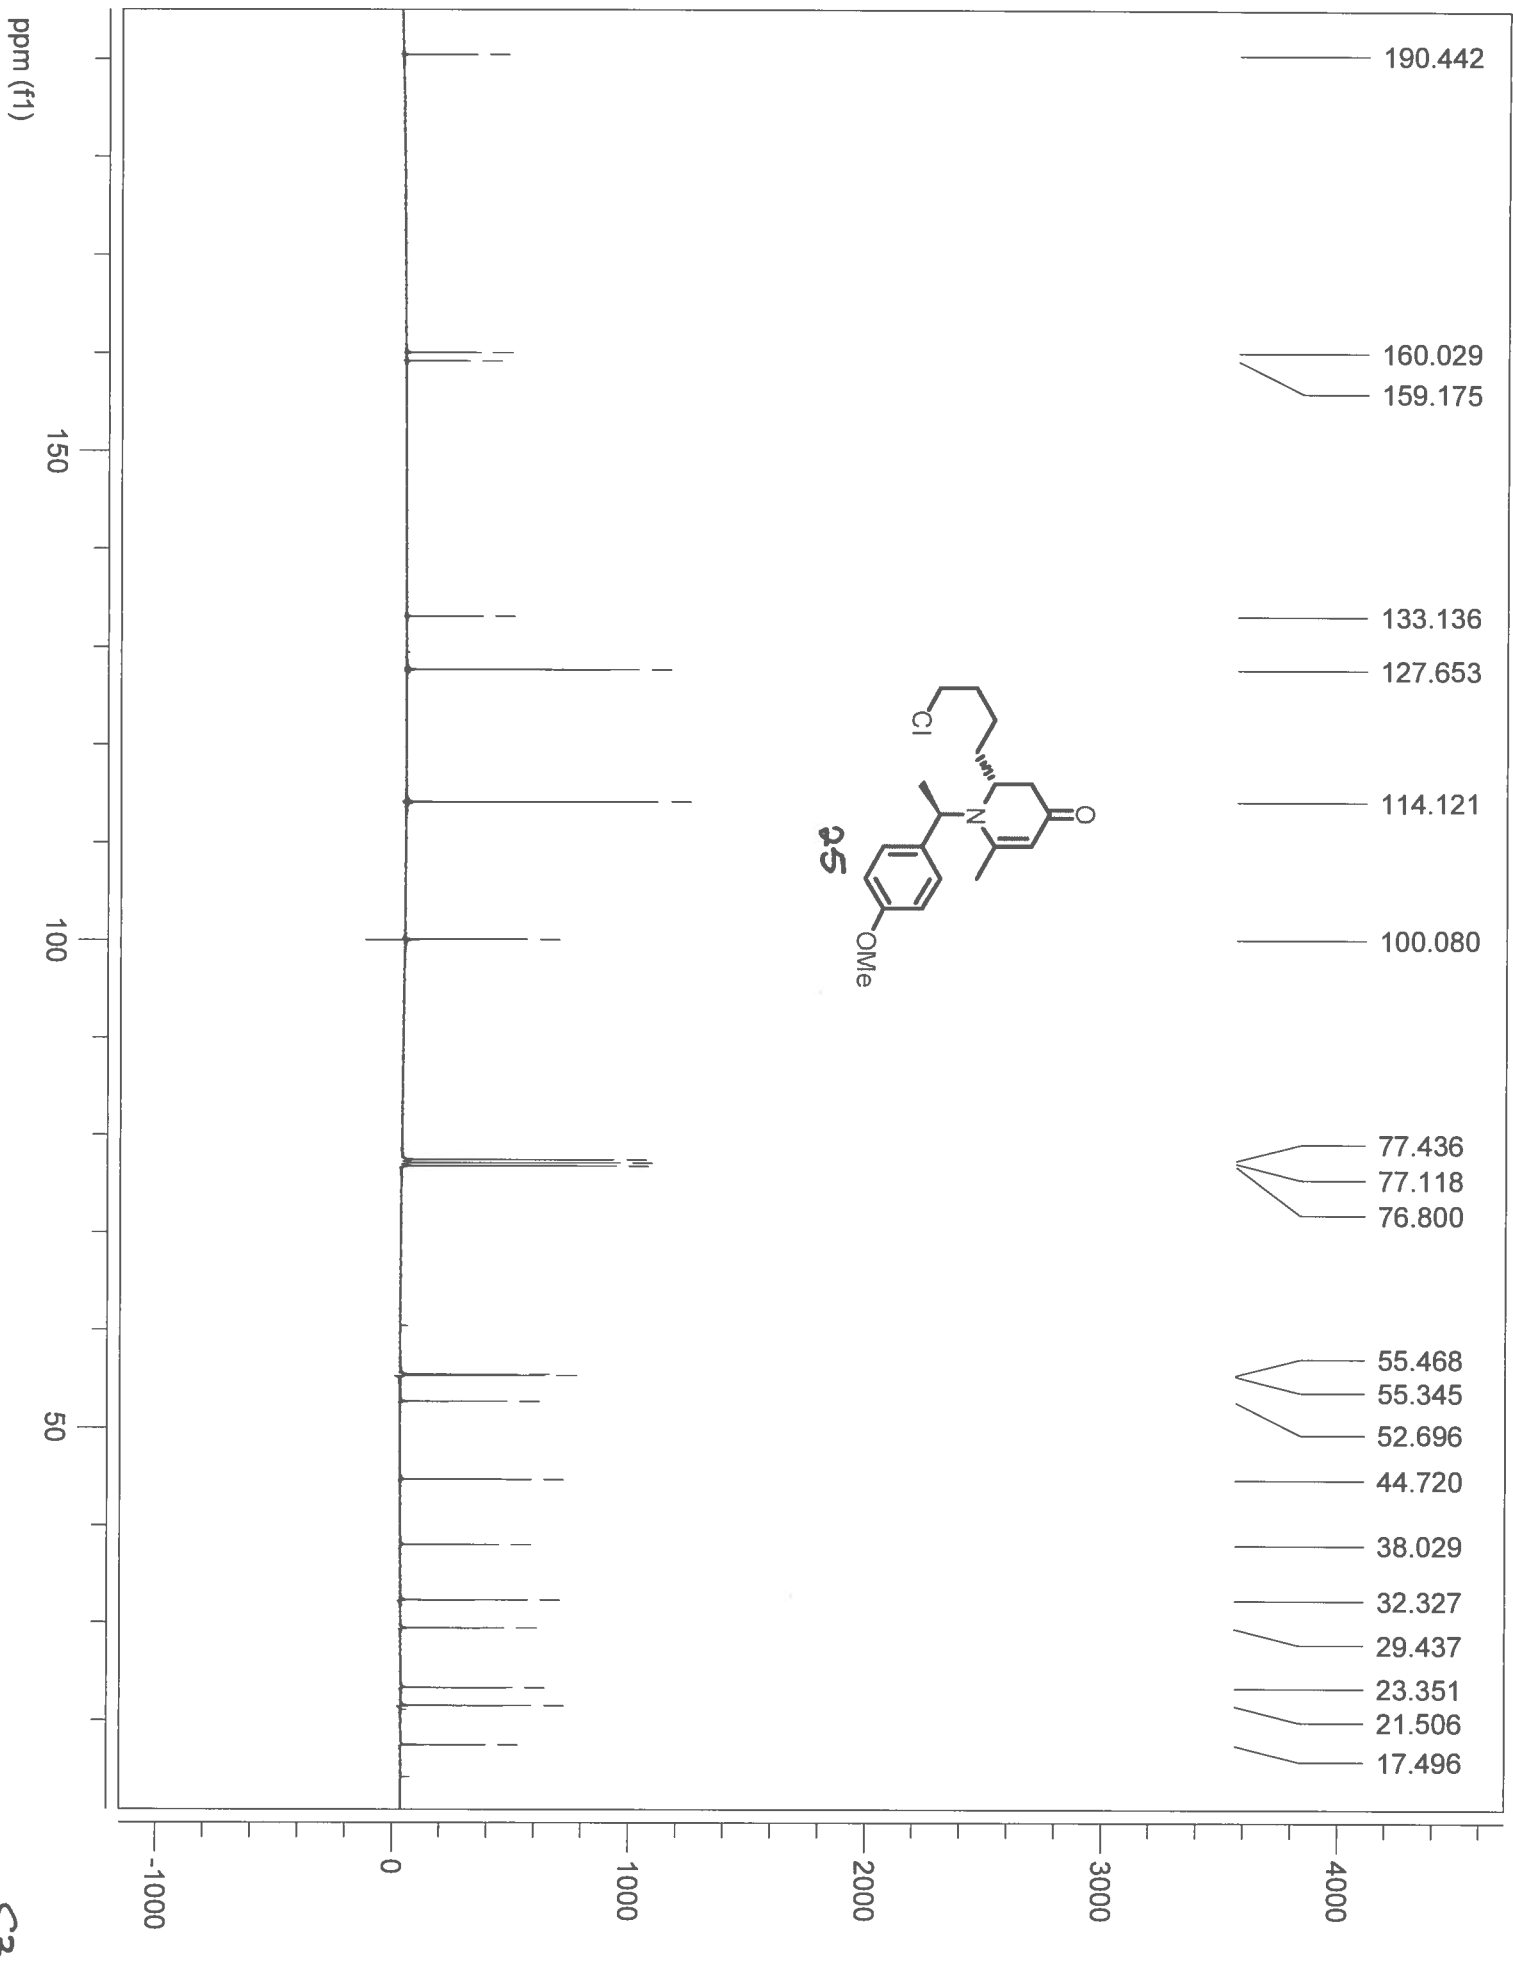

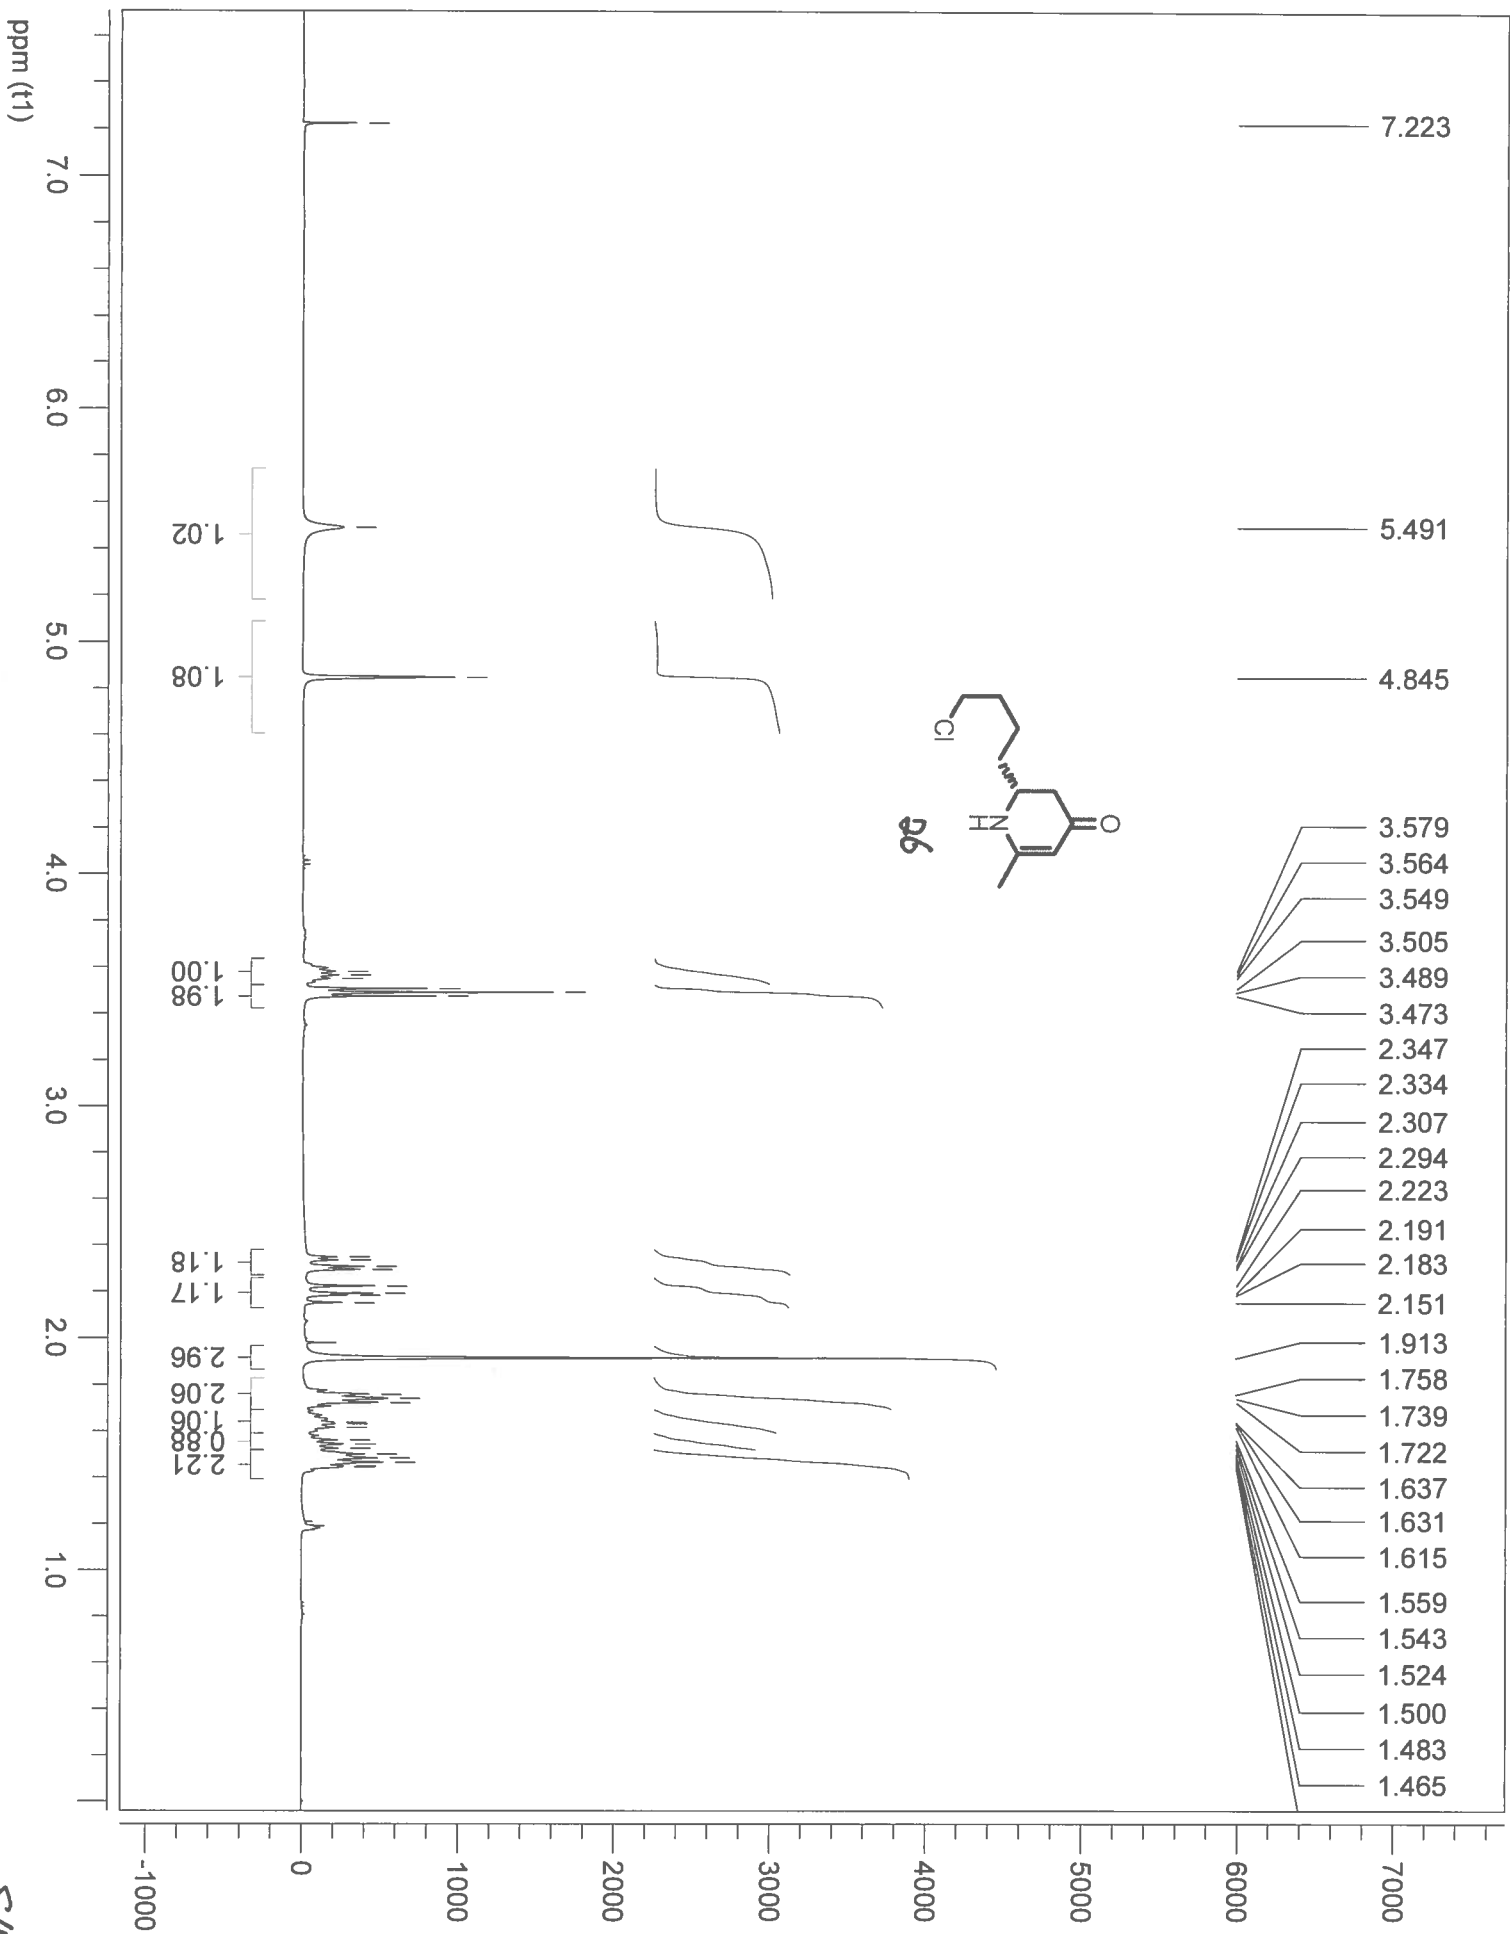

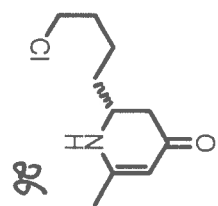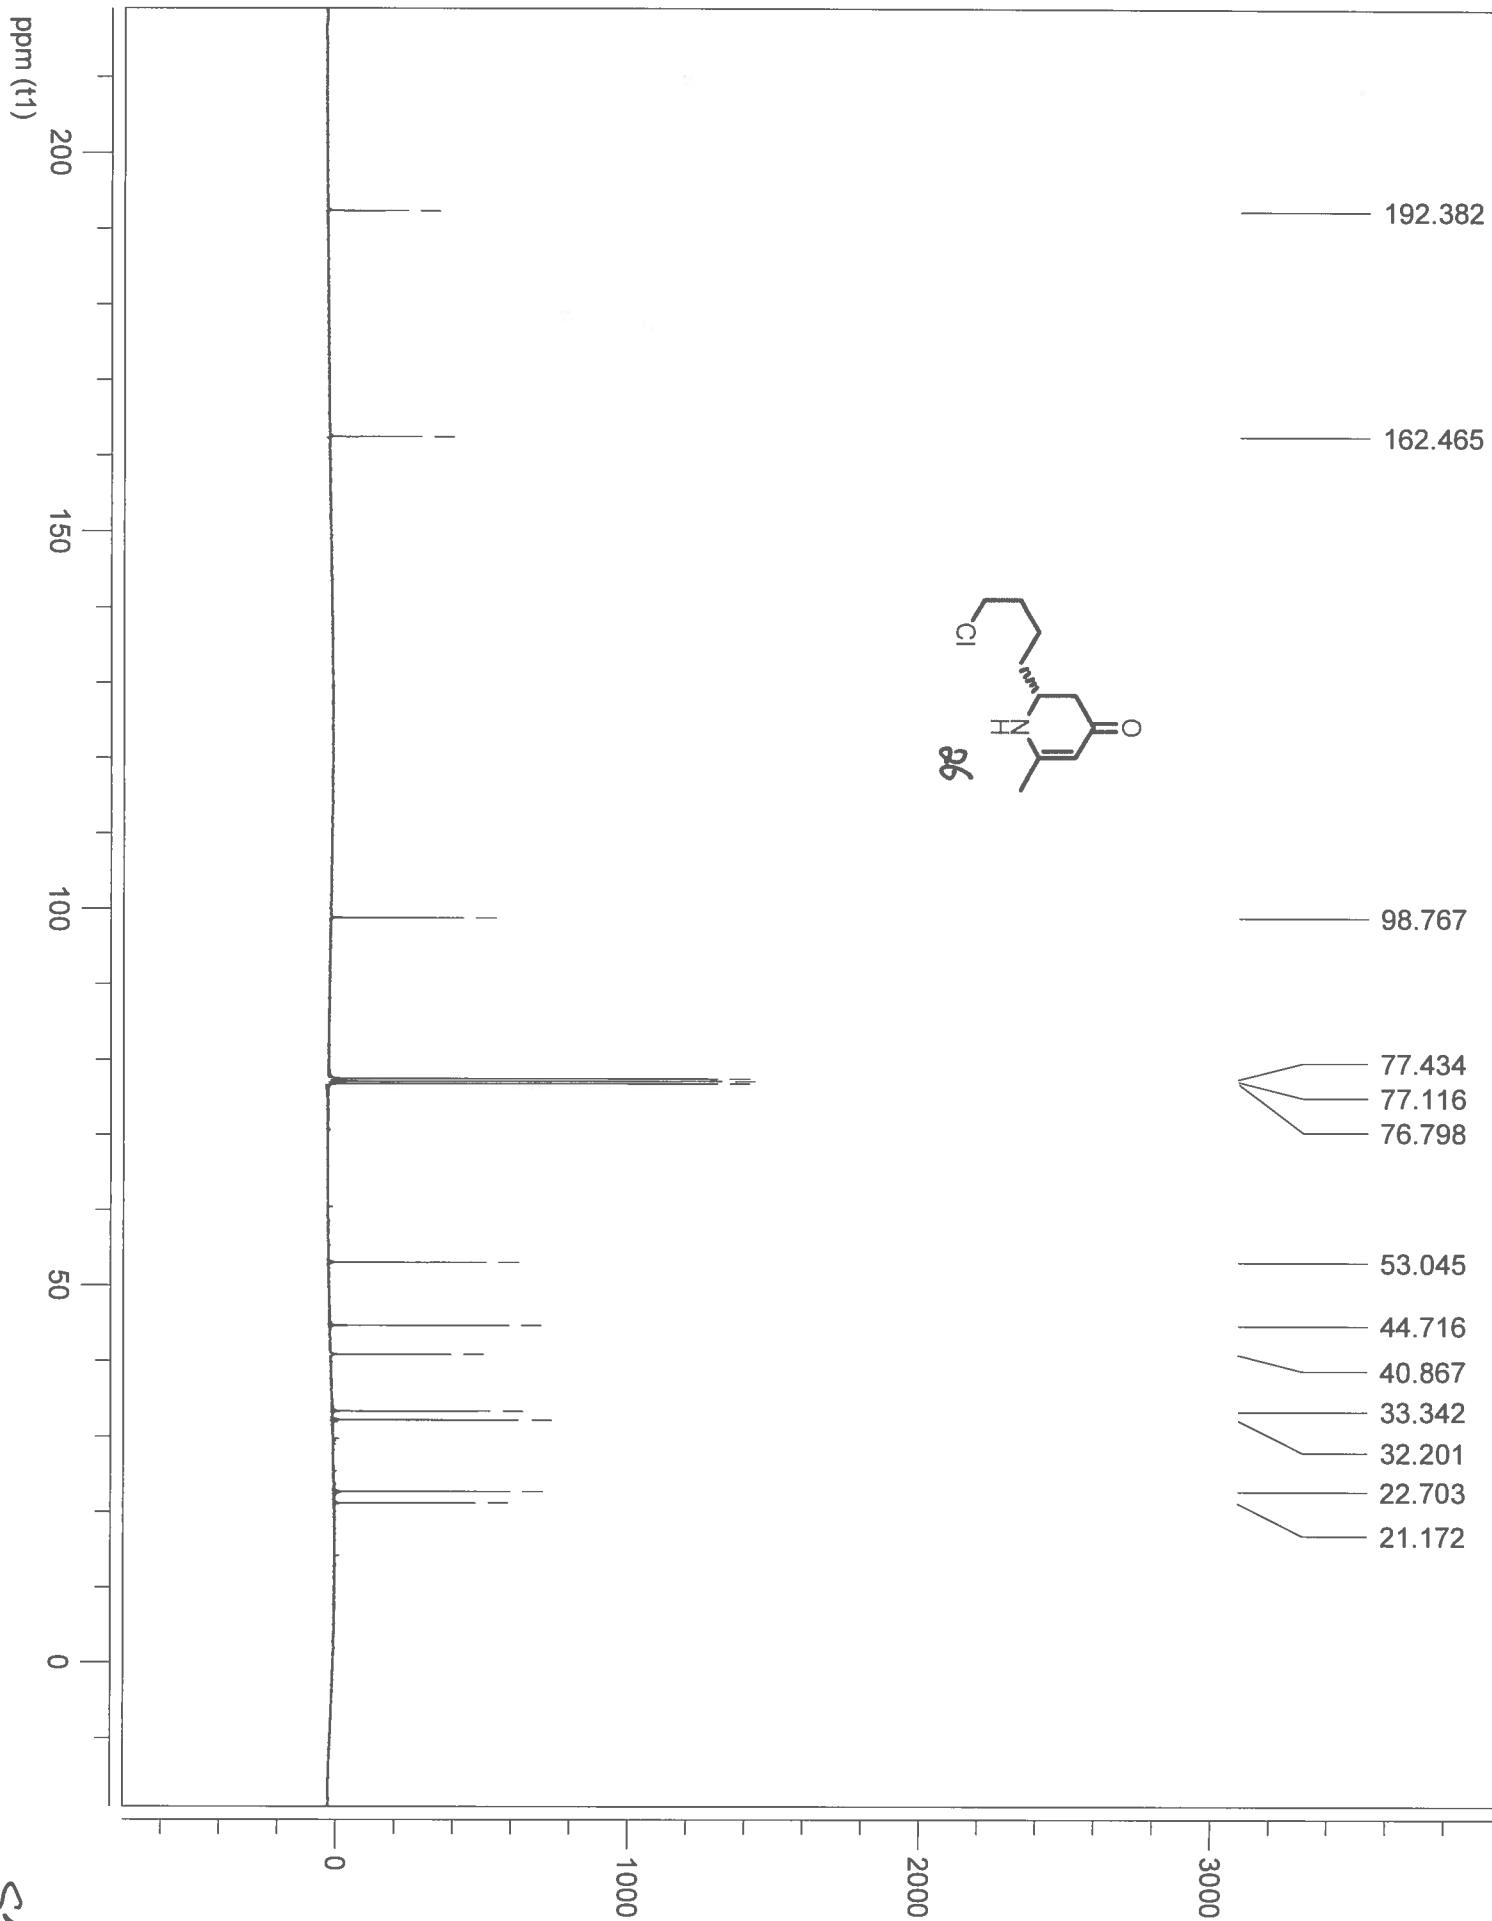

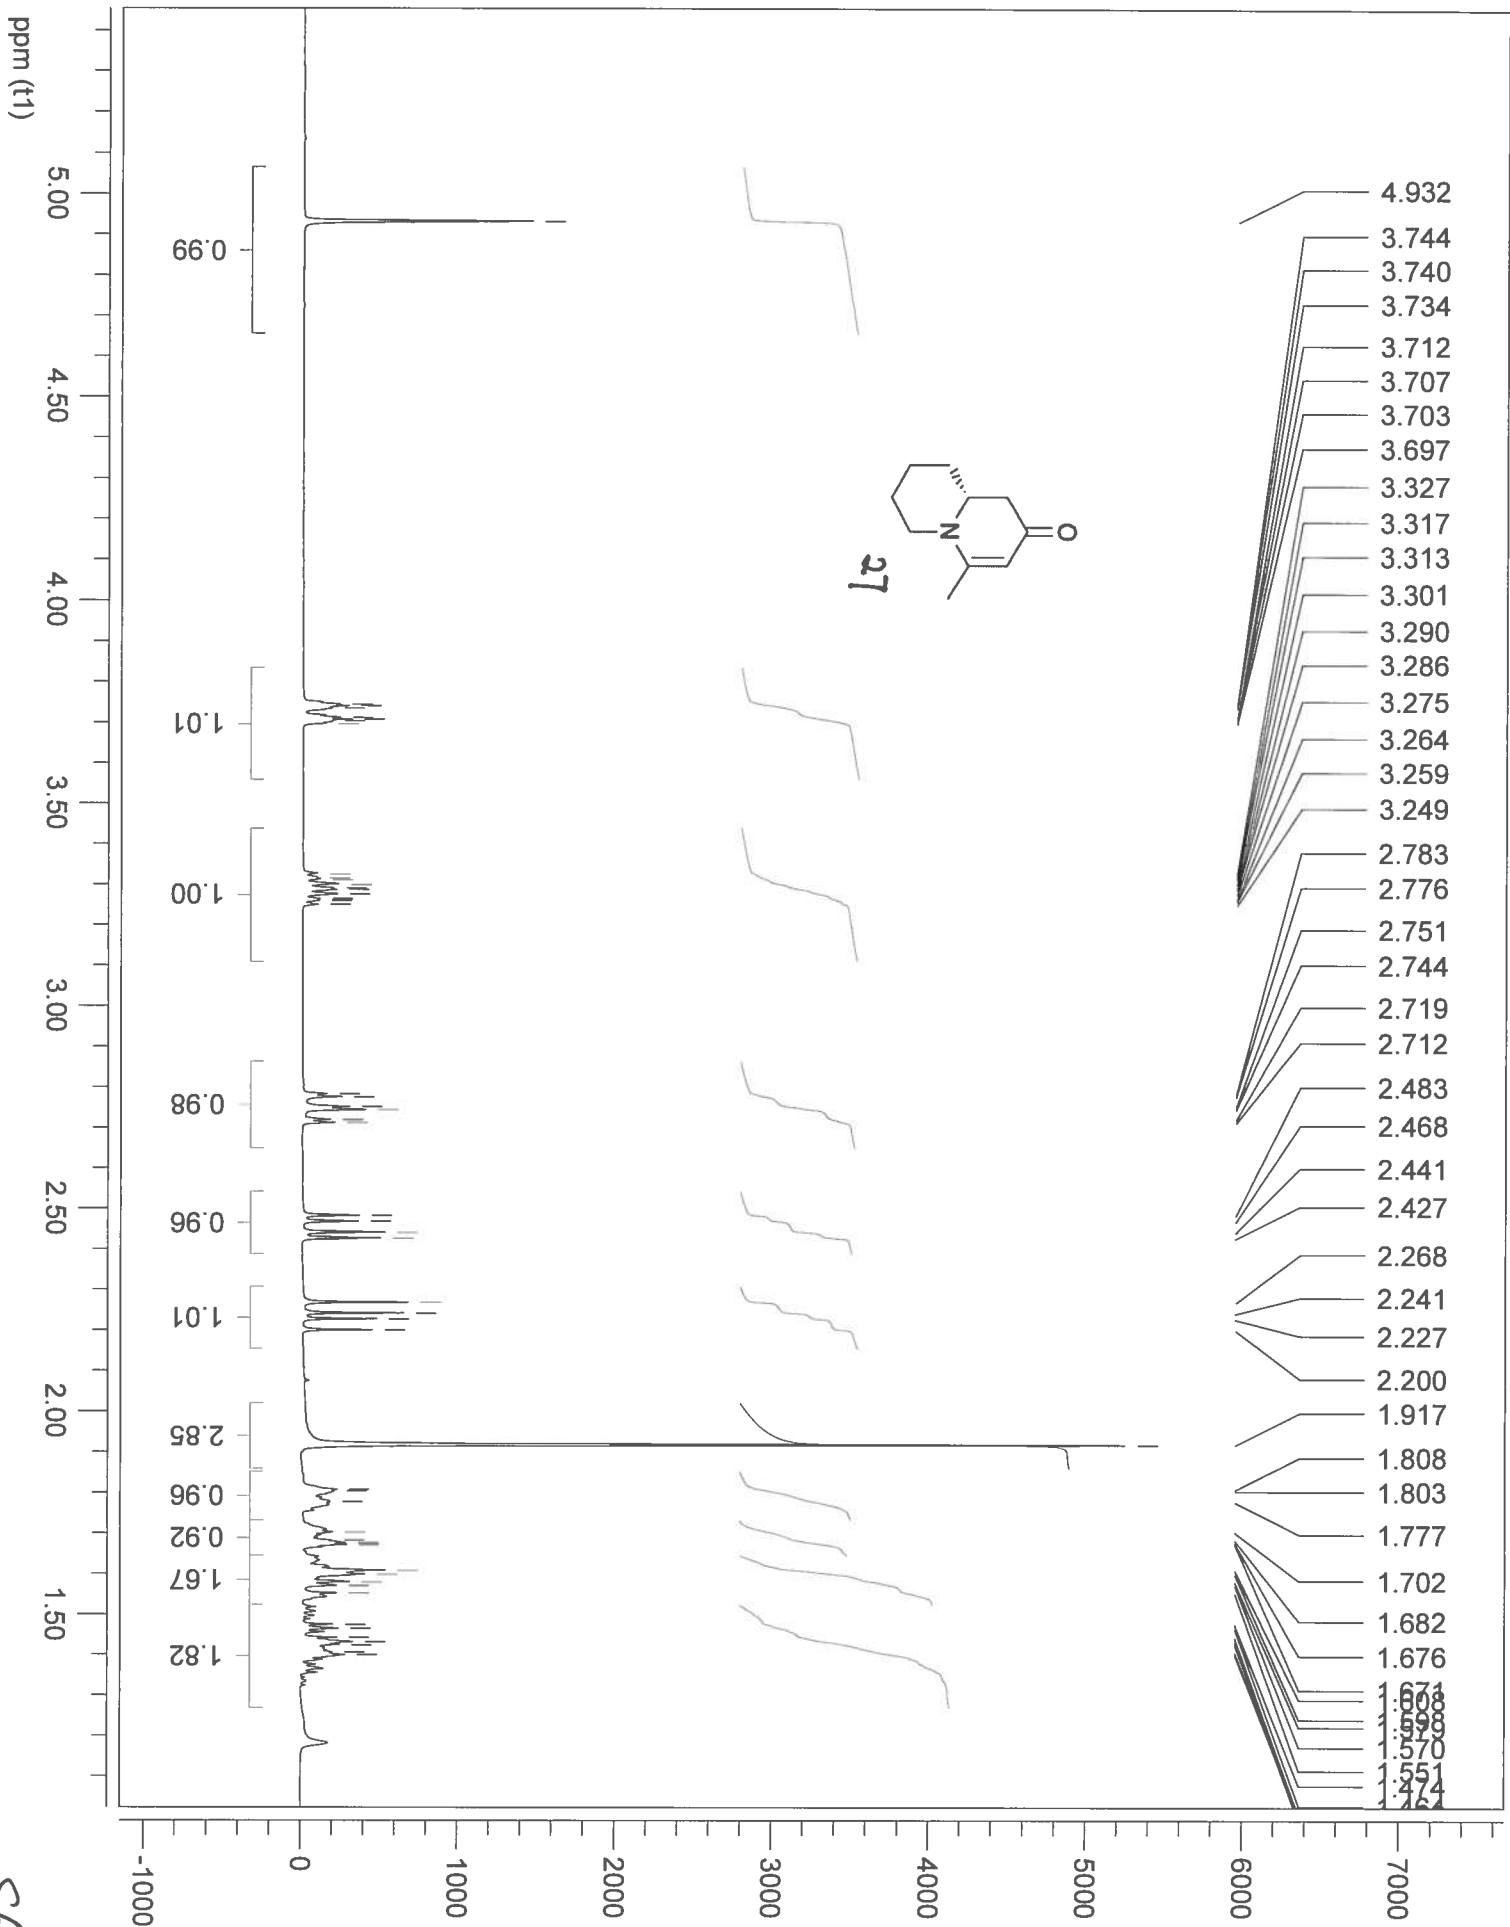

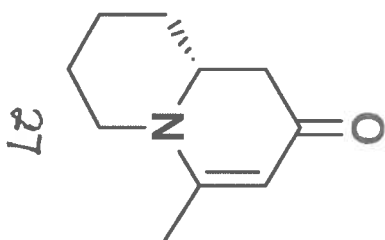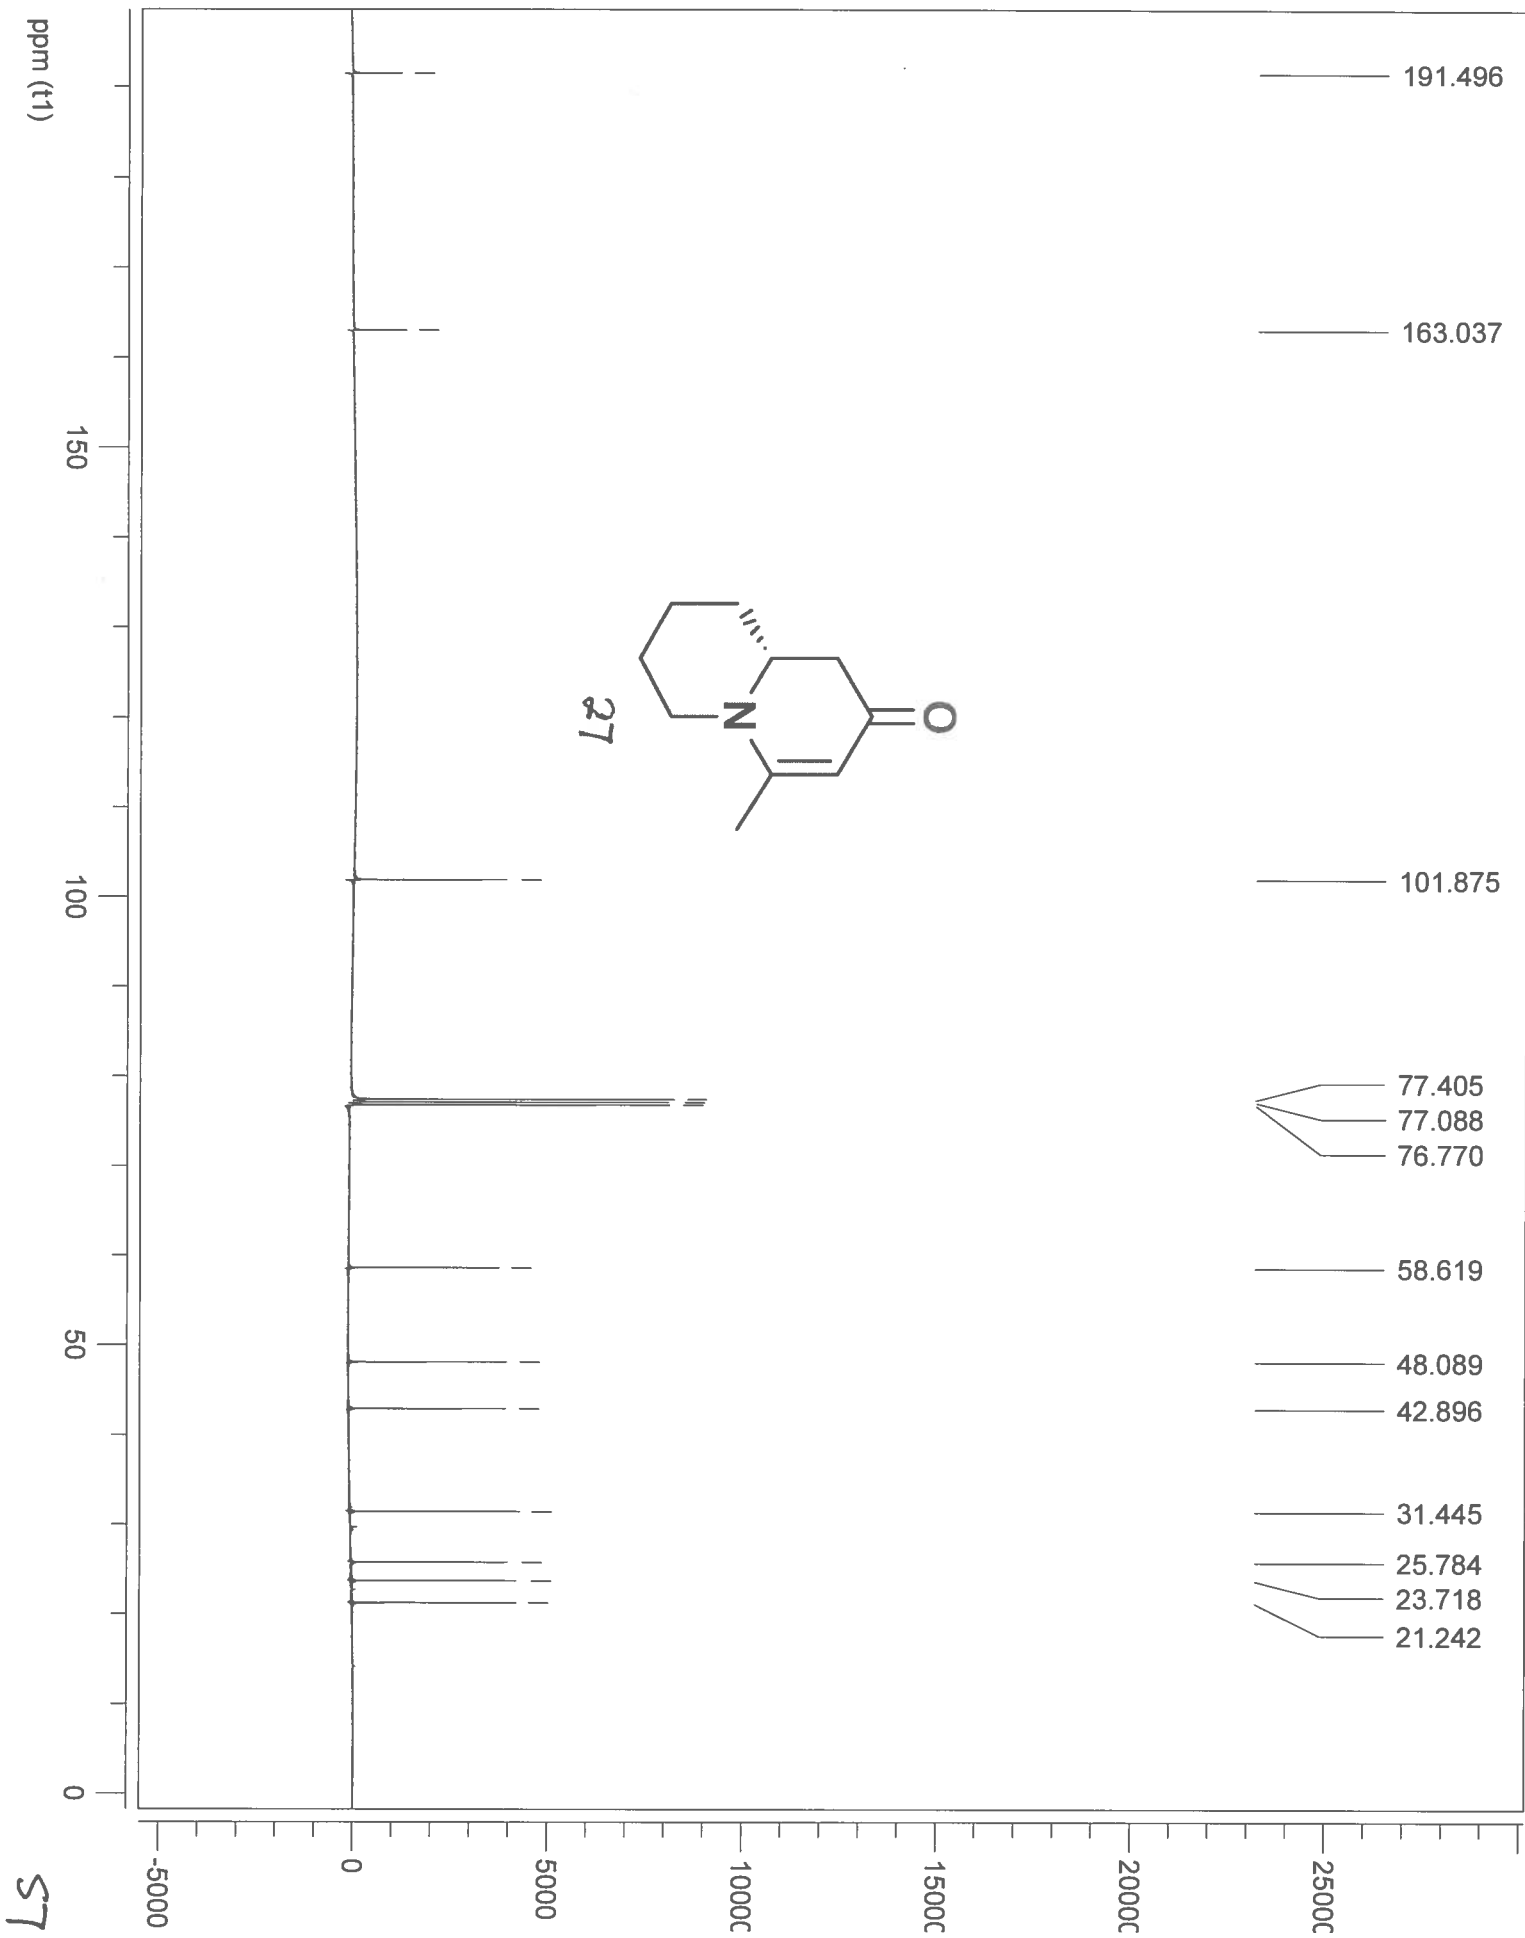



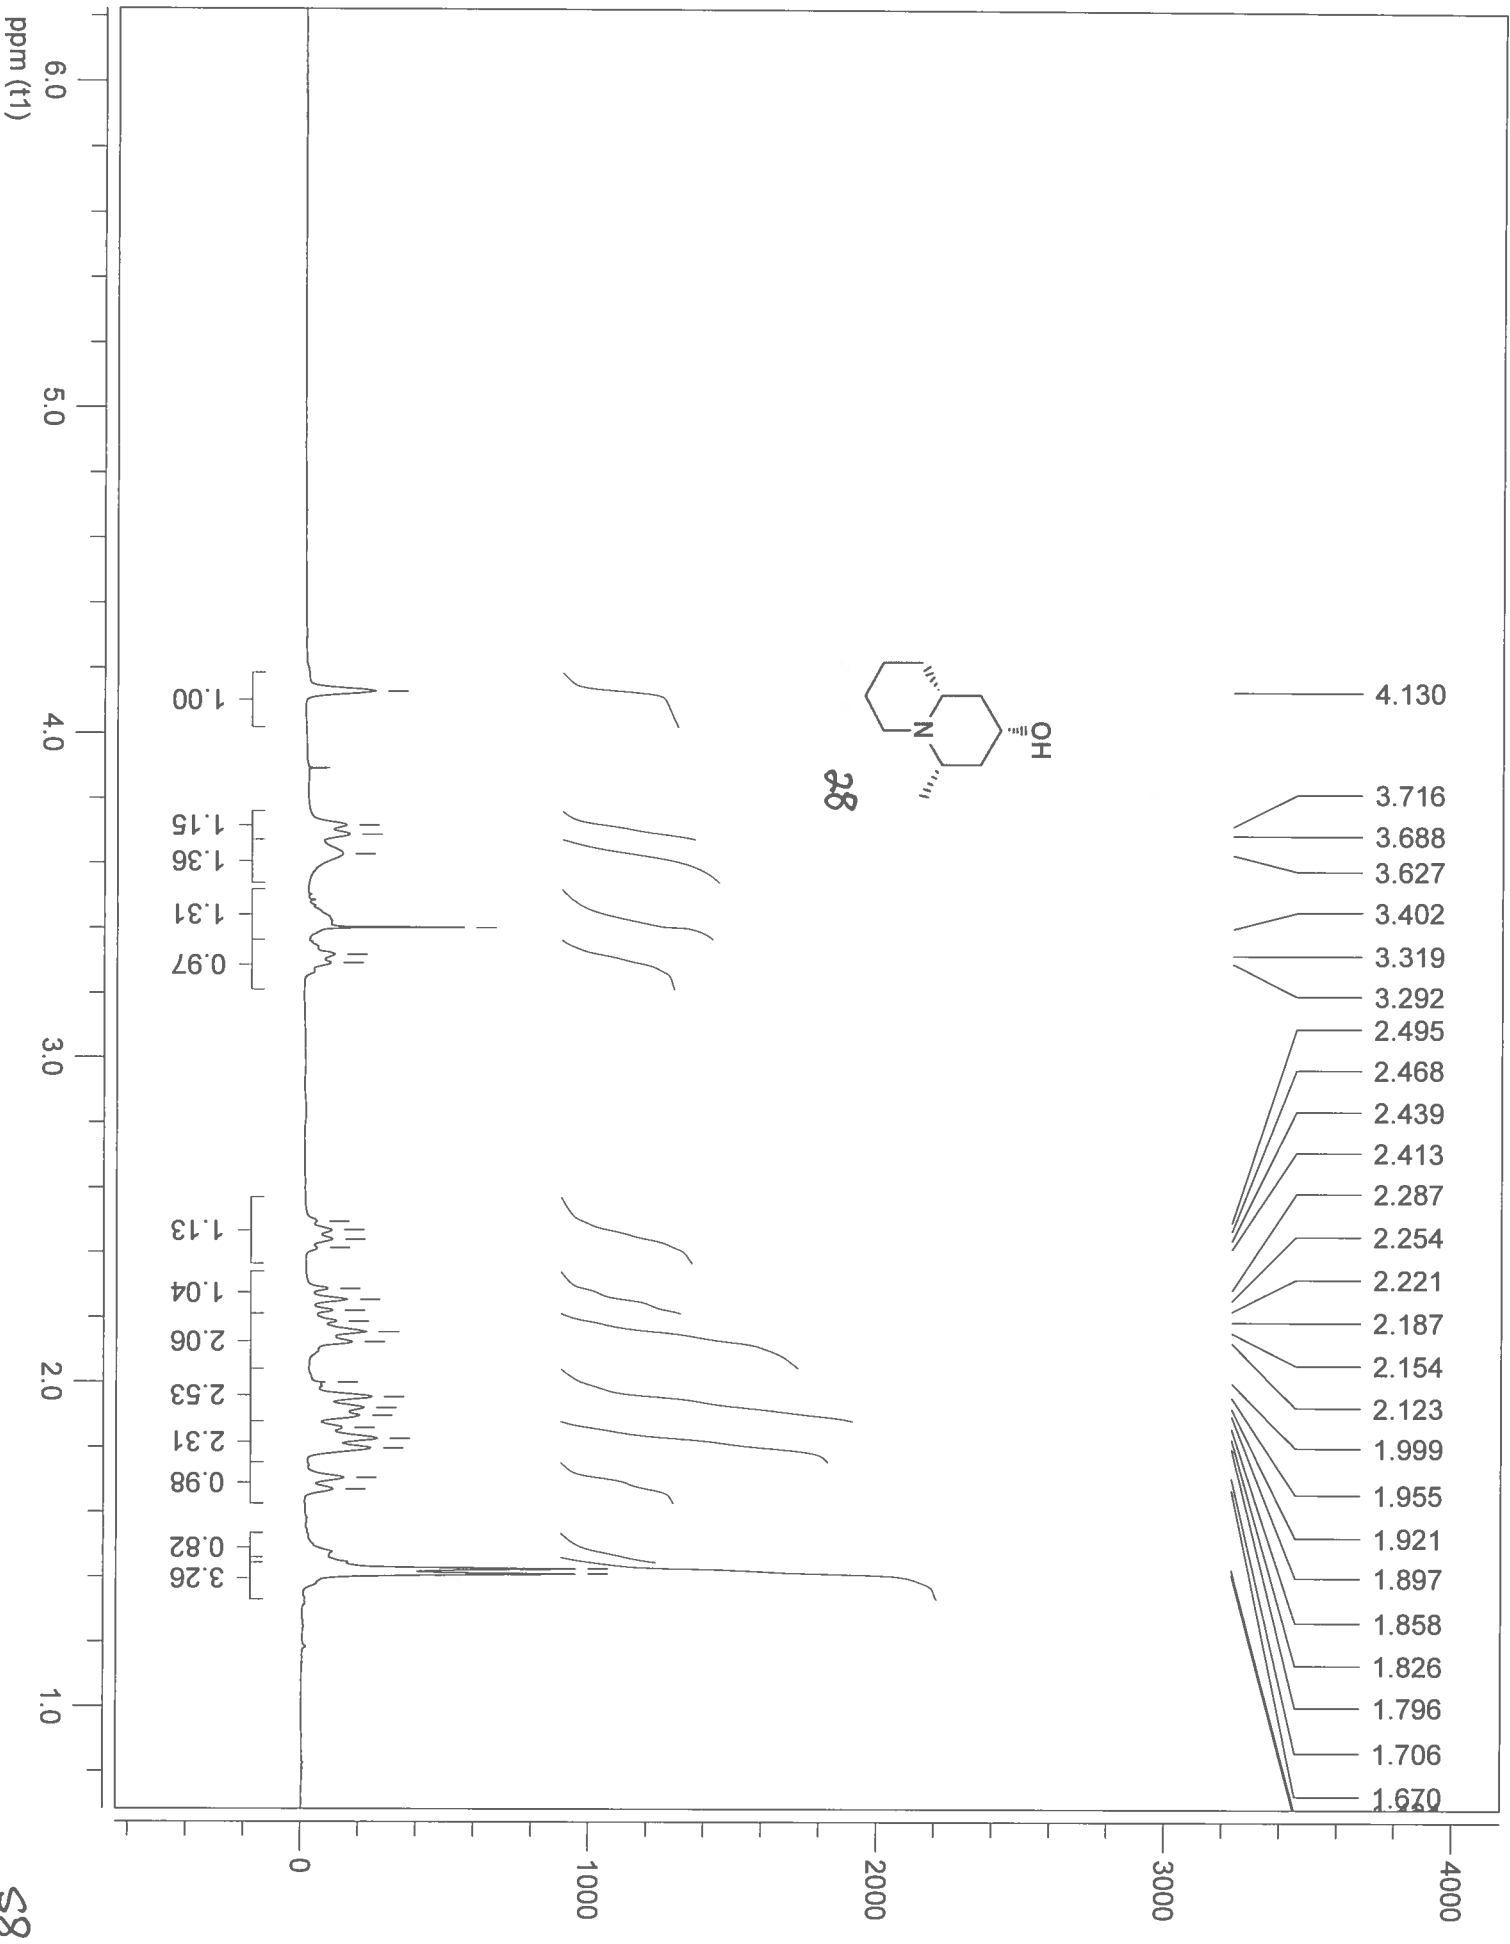

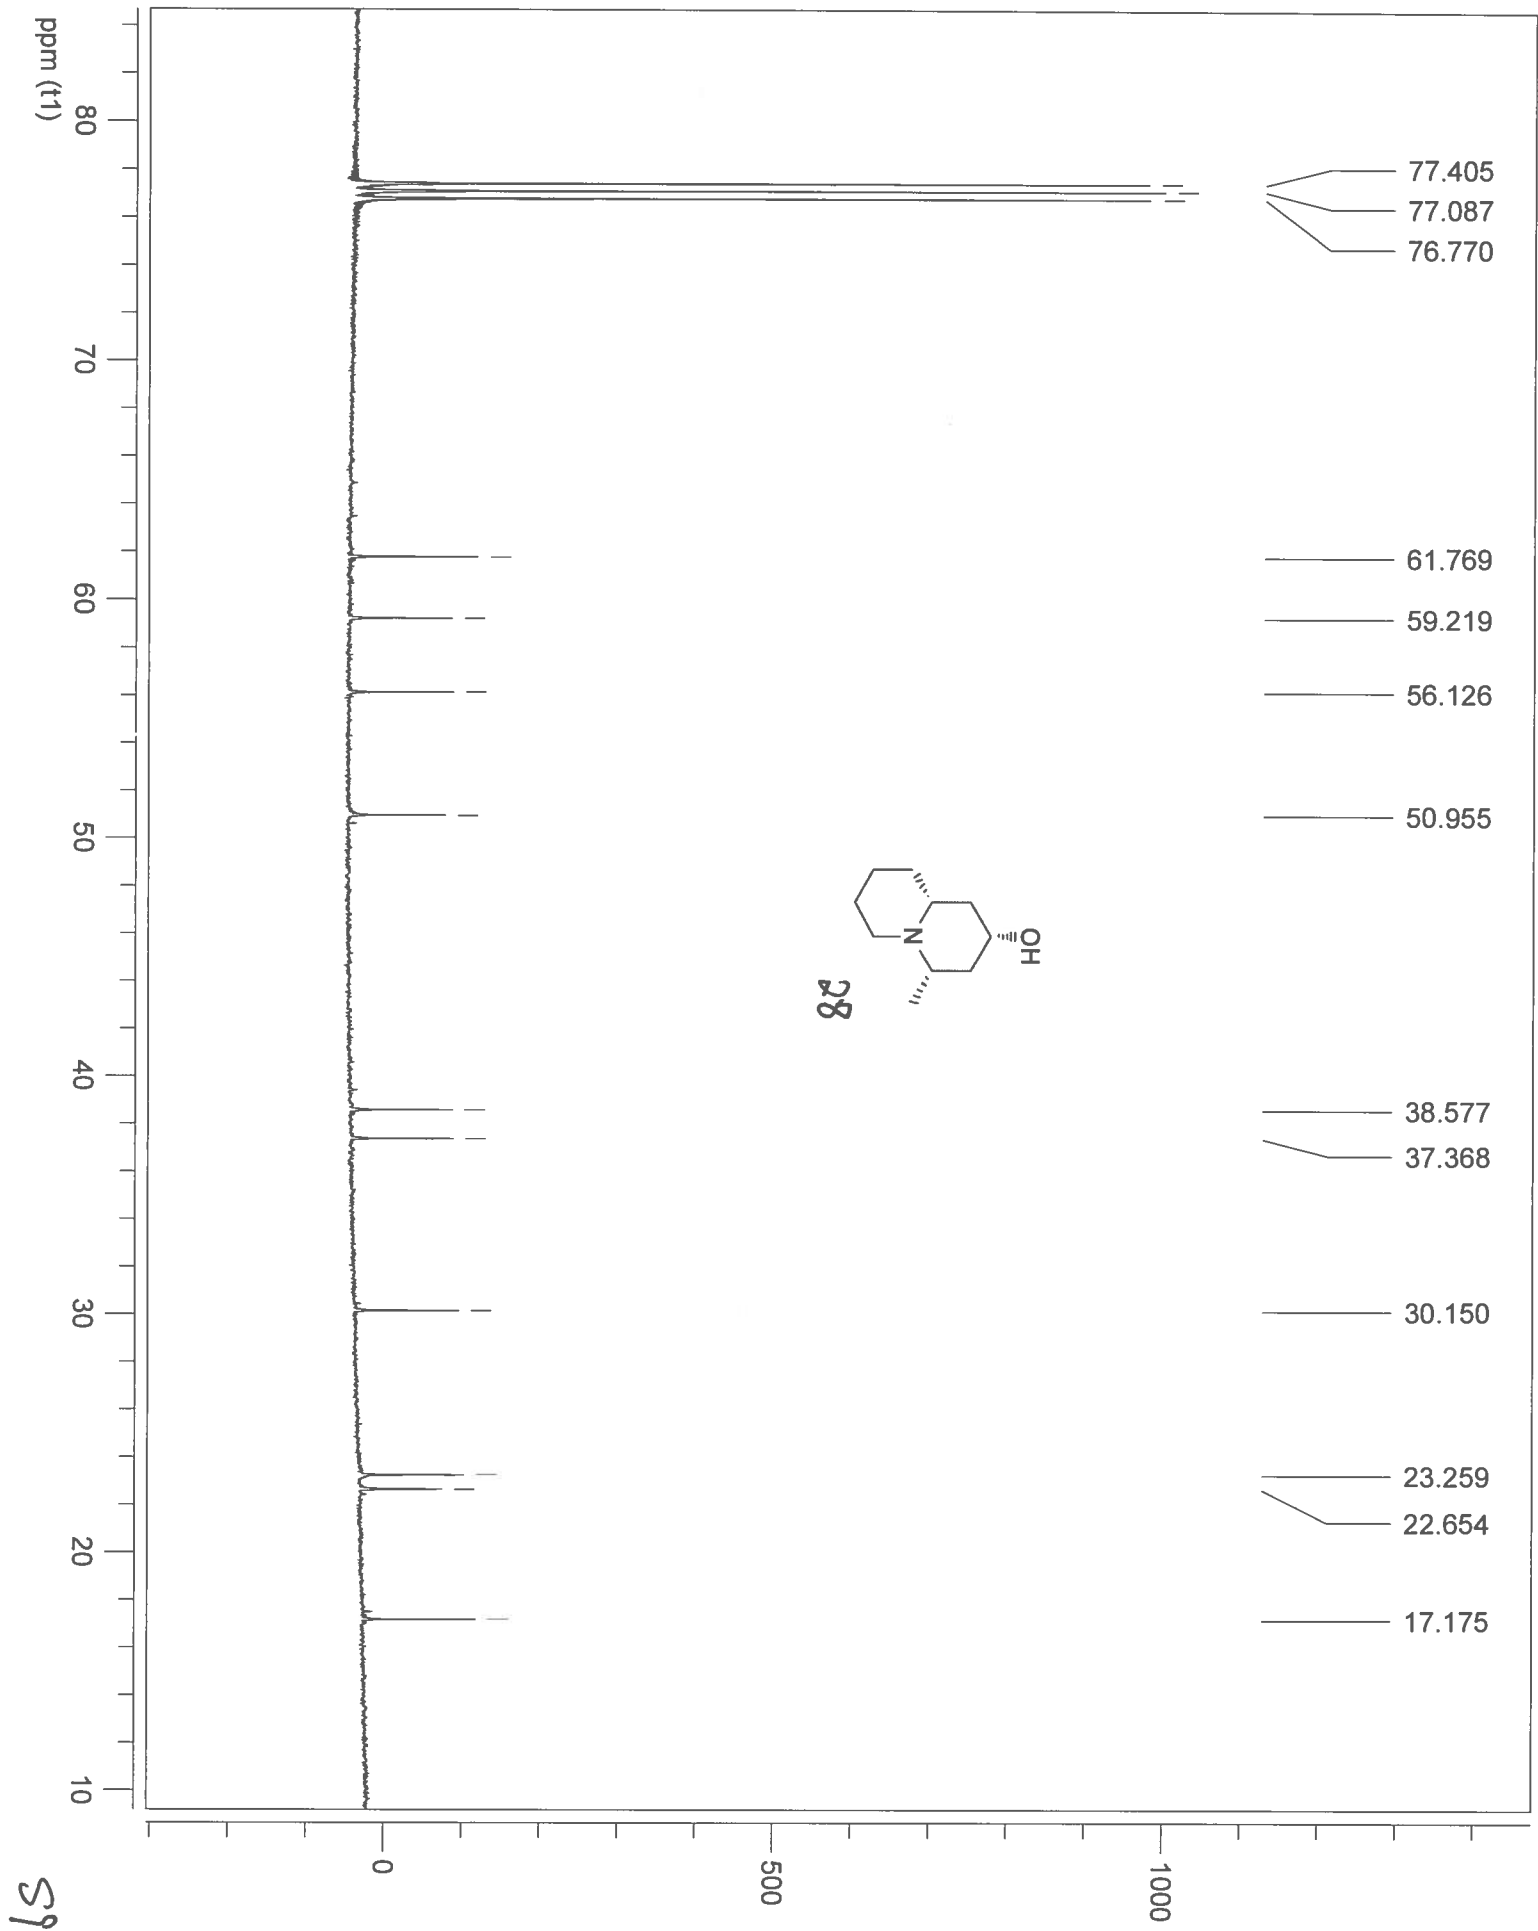

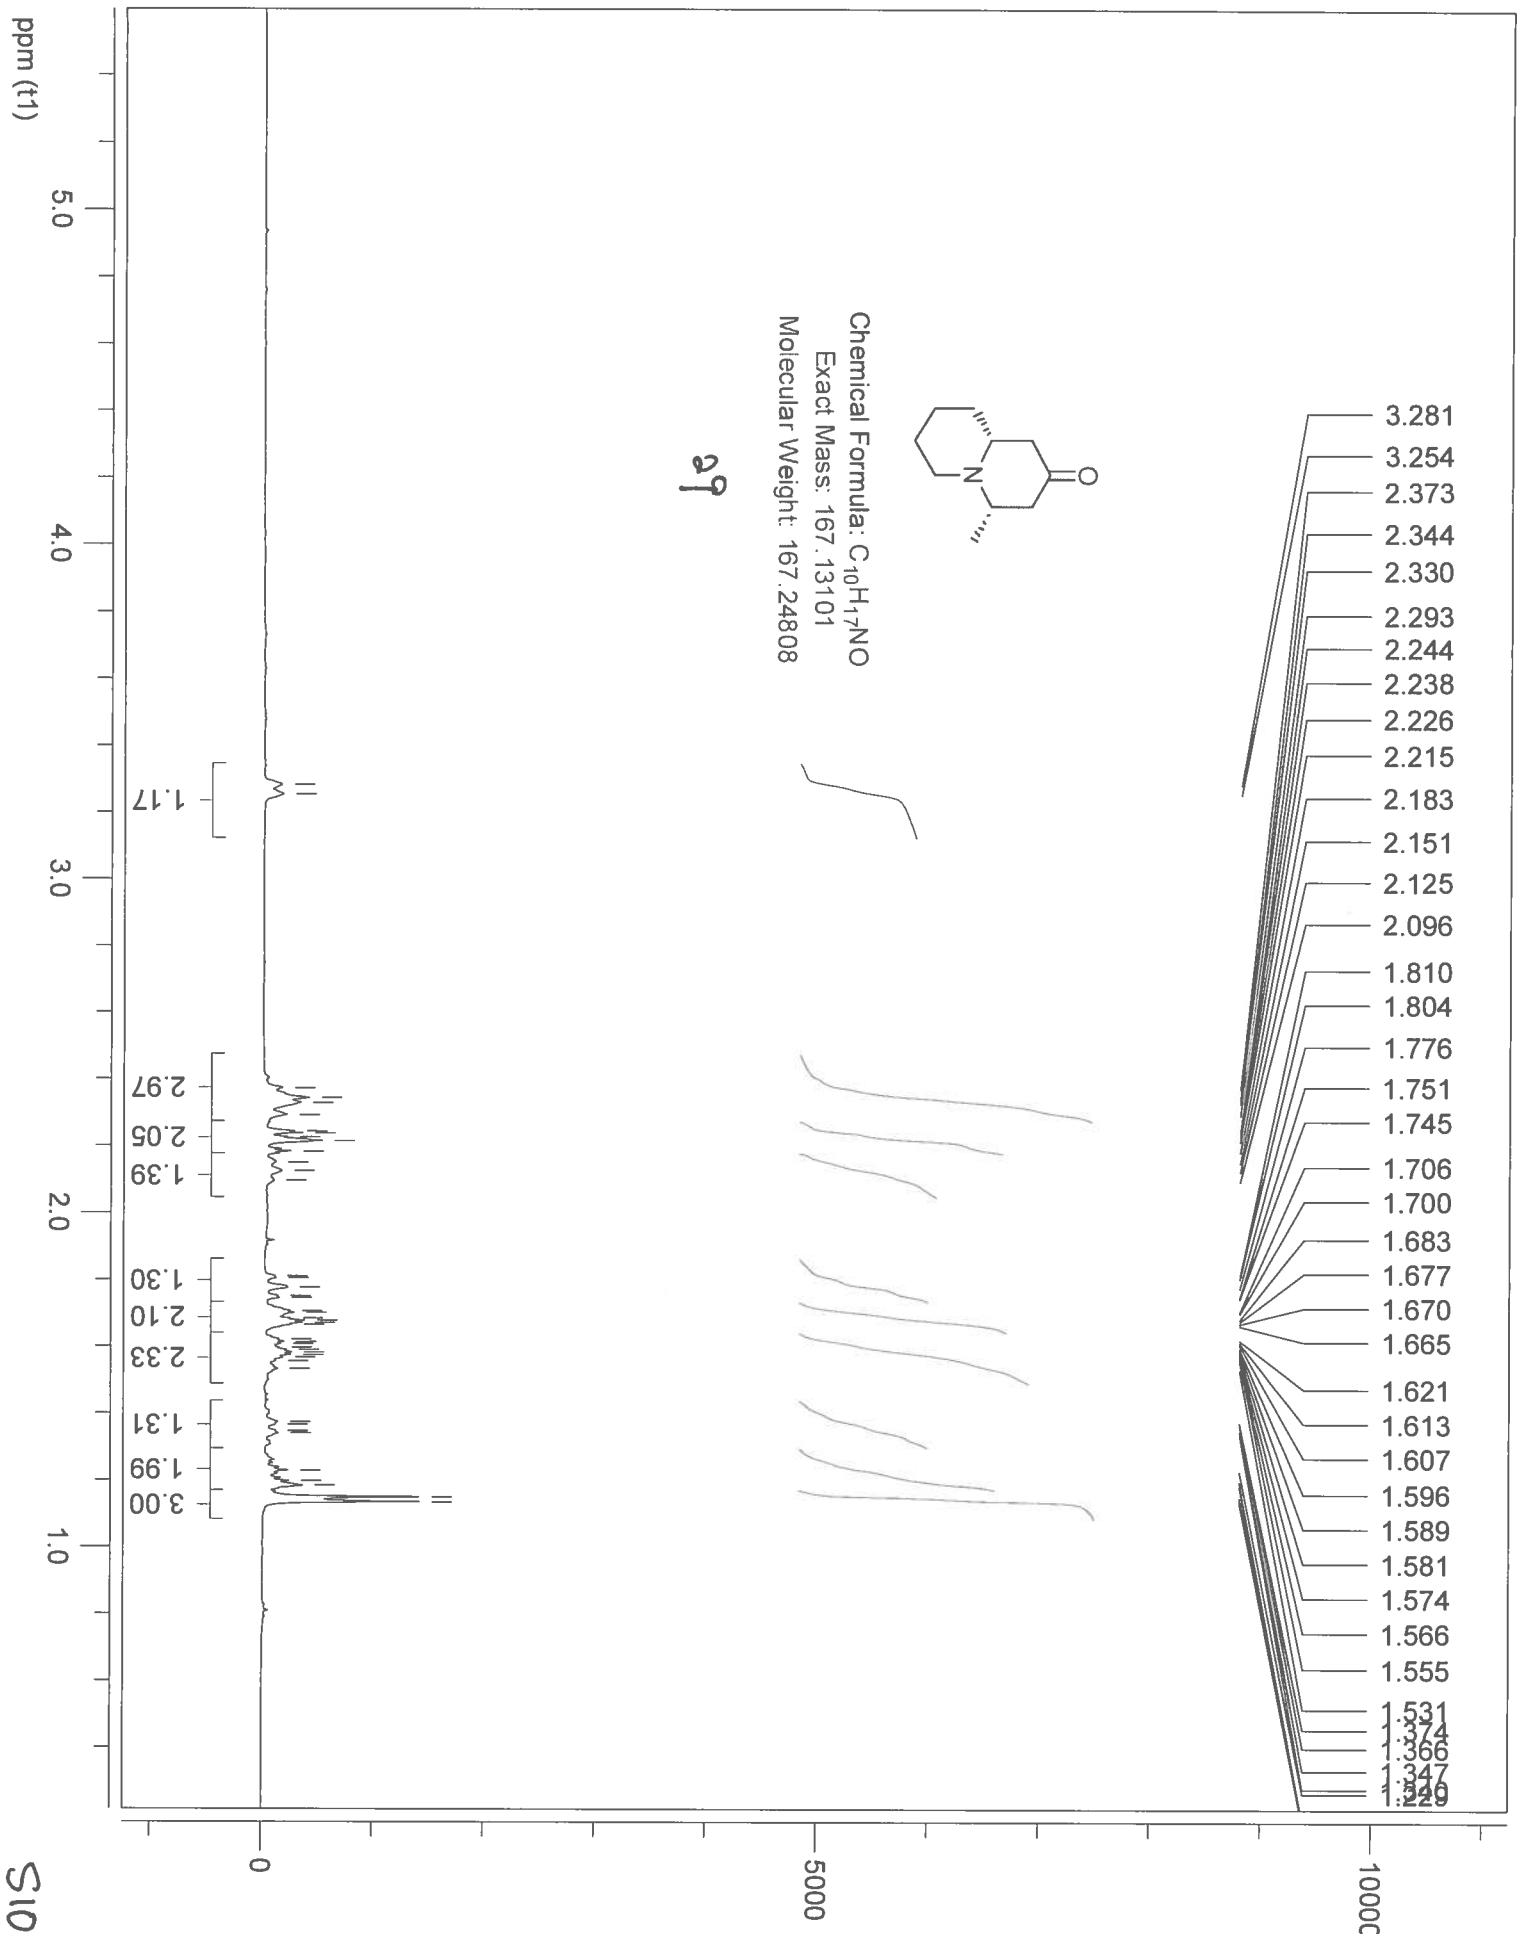

207.939

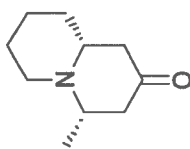

Chemical Formula: C<sub>10</sub>H<sub>17</sub>NO  
Exact Mass: 167.13101  
Molecular Weight: 167.24808

29

76.876  
76.559  
76.241

61.604  
58.865  
50.553  
49.211  
48.162

33.596

25.360  
23.431  
20.191

ppm (t1)

811

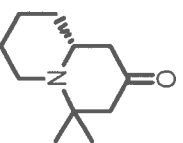

Chemical Formula:  $C_{11}H_{19}NO$   
 Exact Mass: 181.14666  
 Molecular Weight: 181.27466  
**30a**

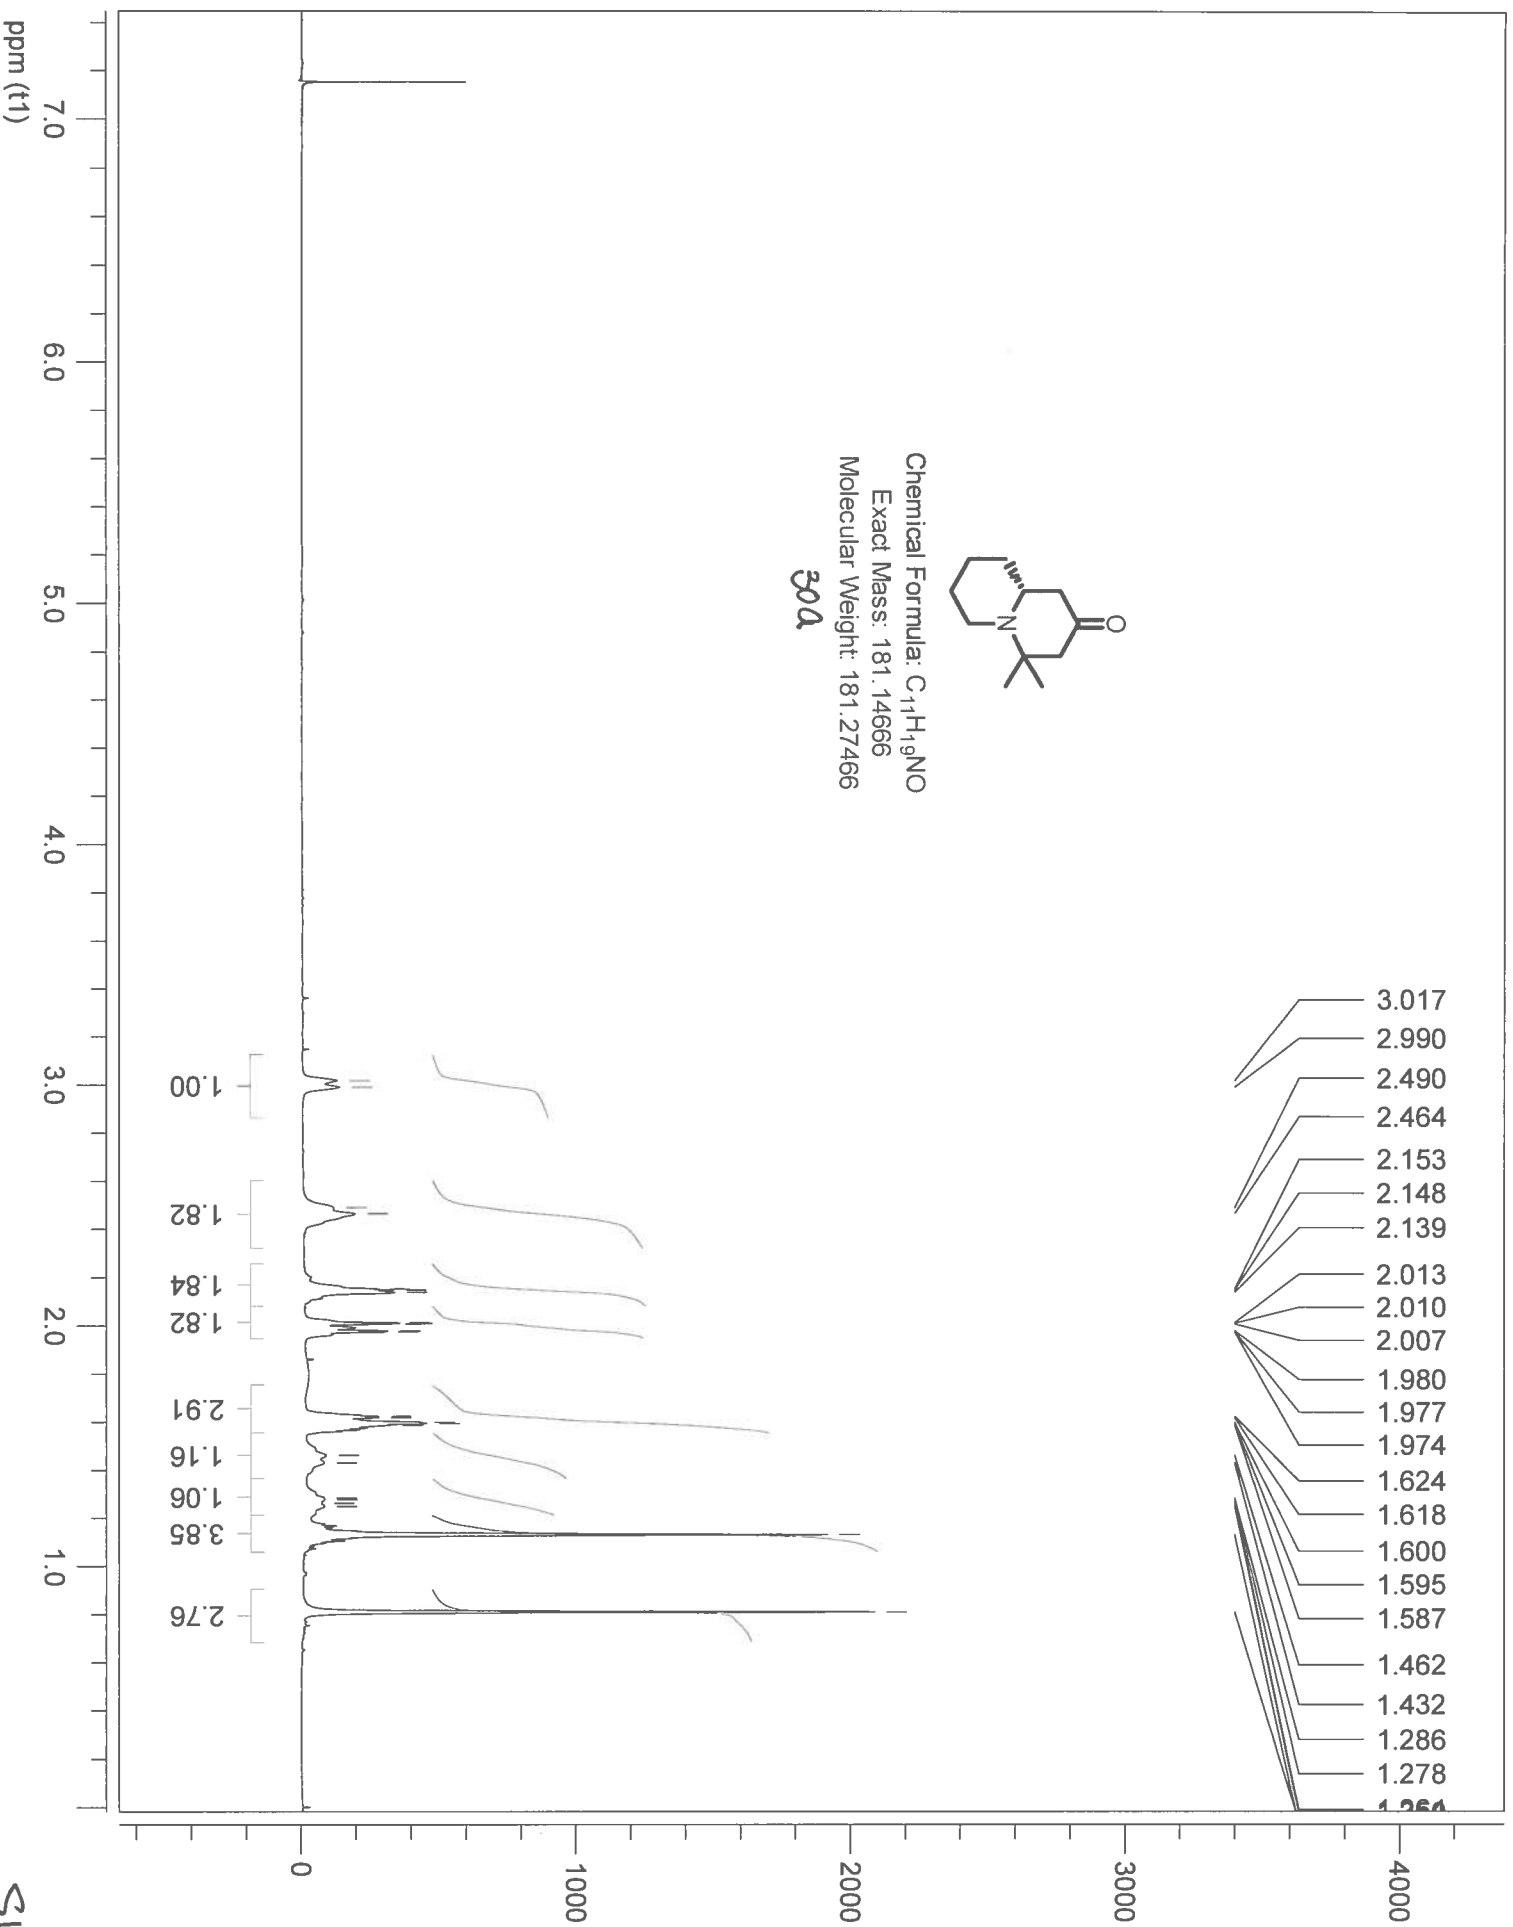

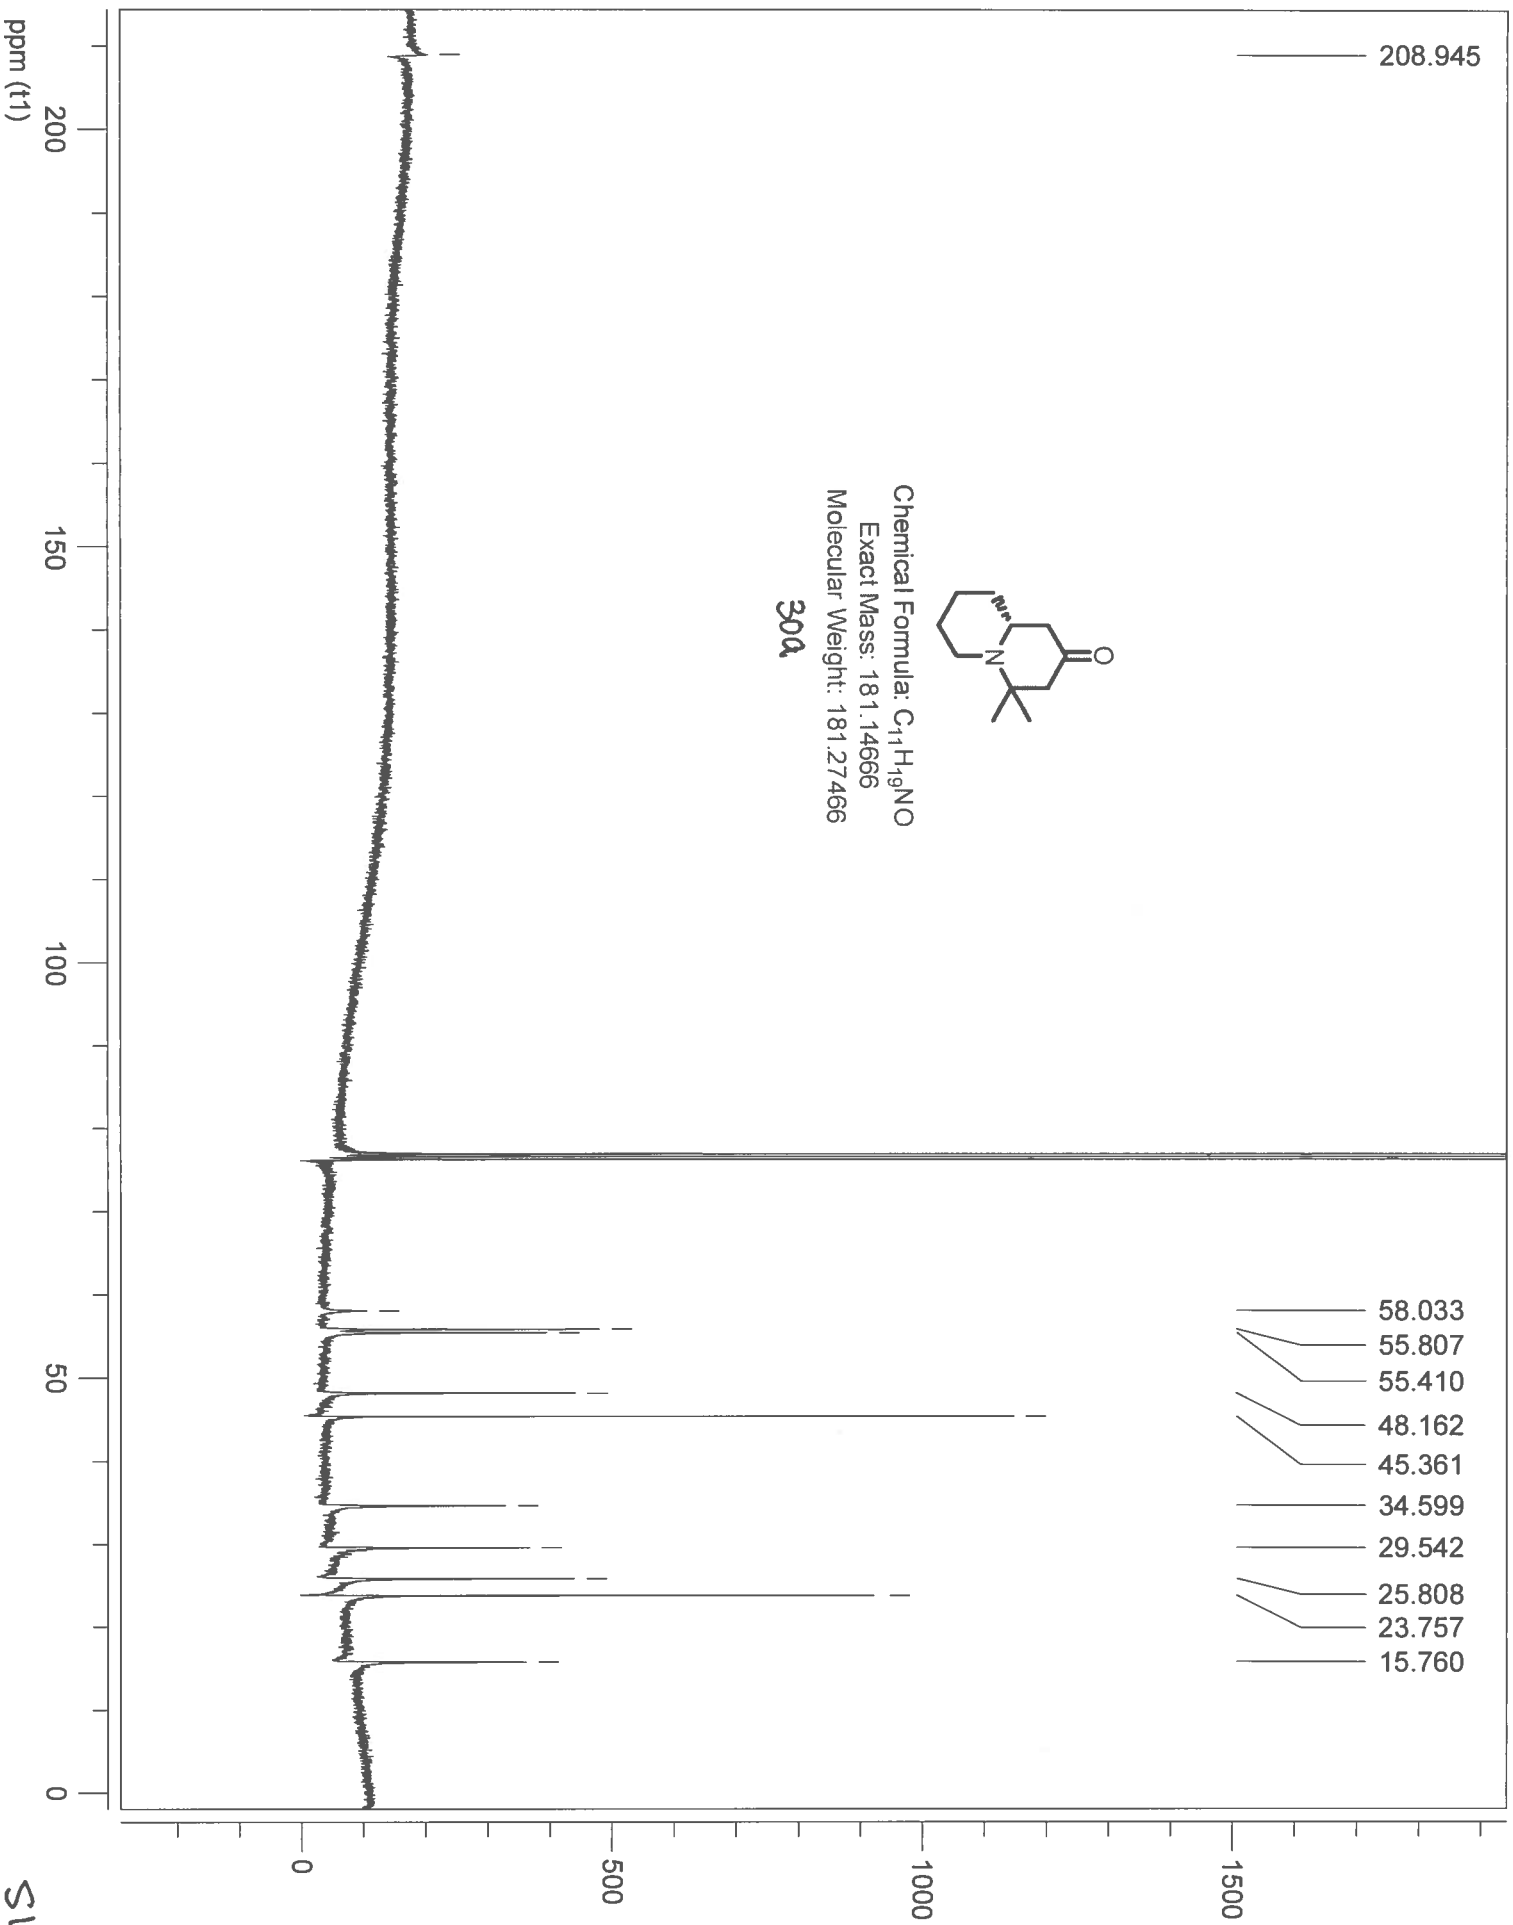

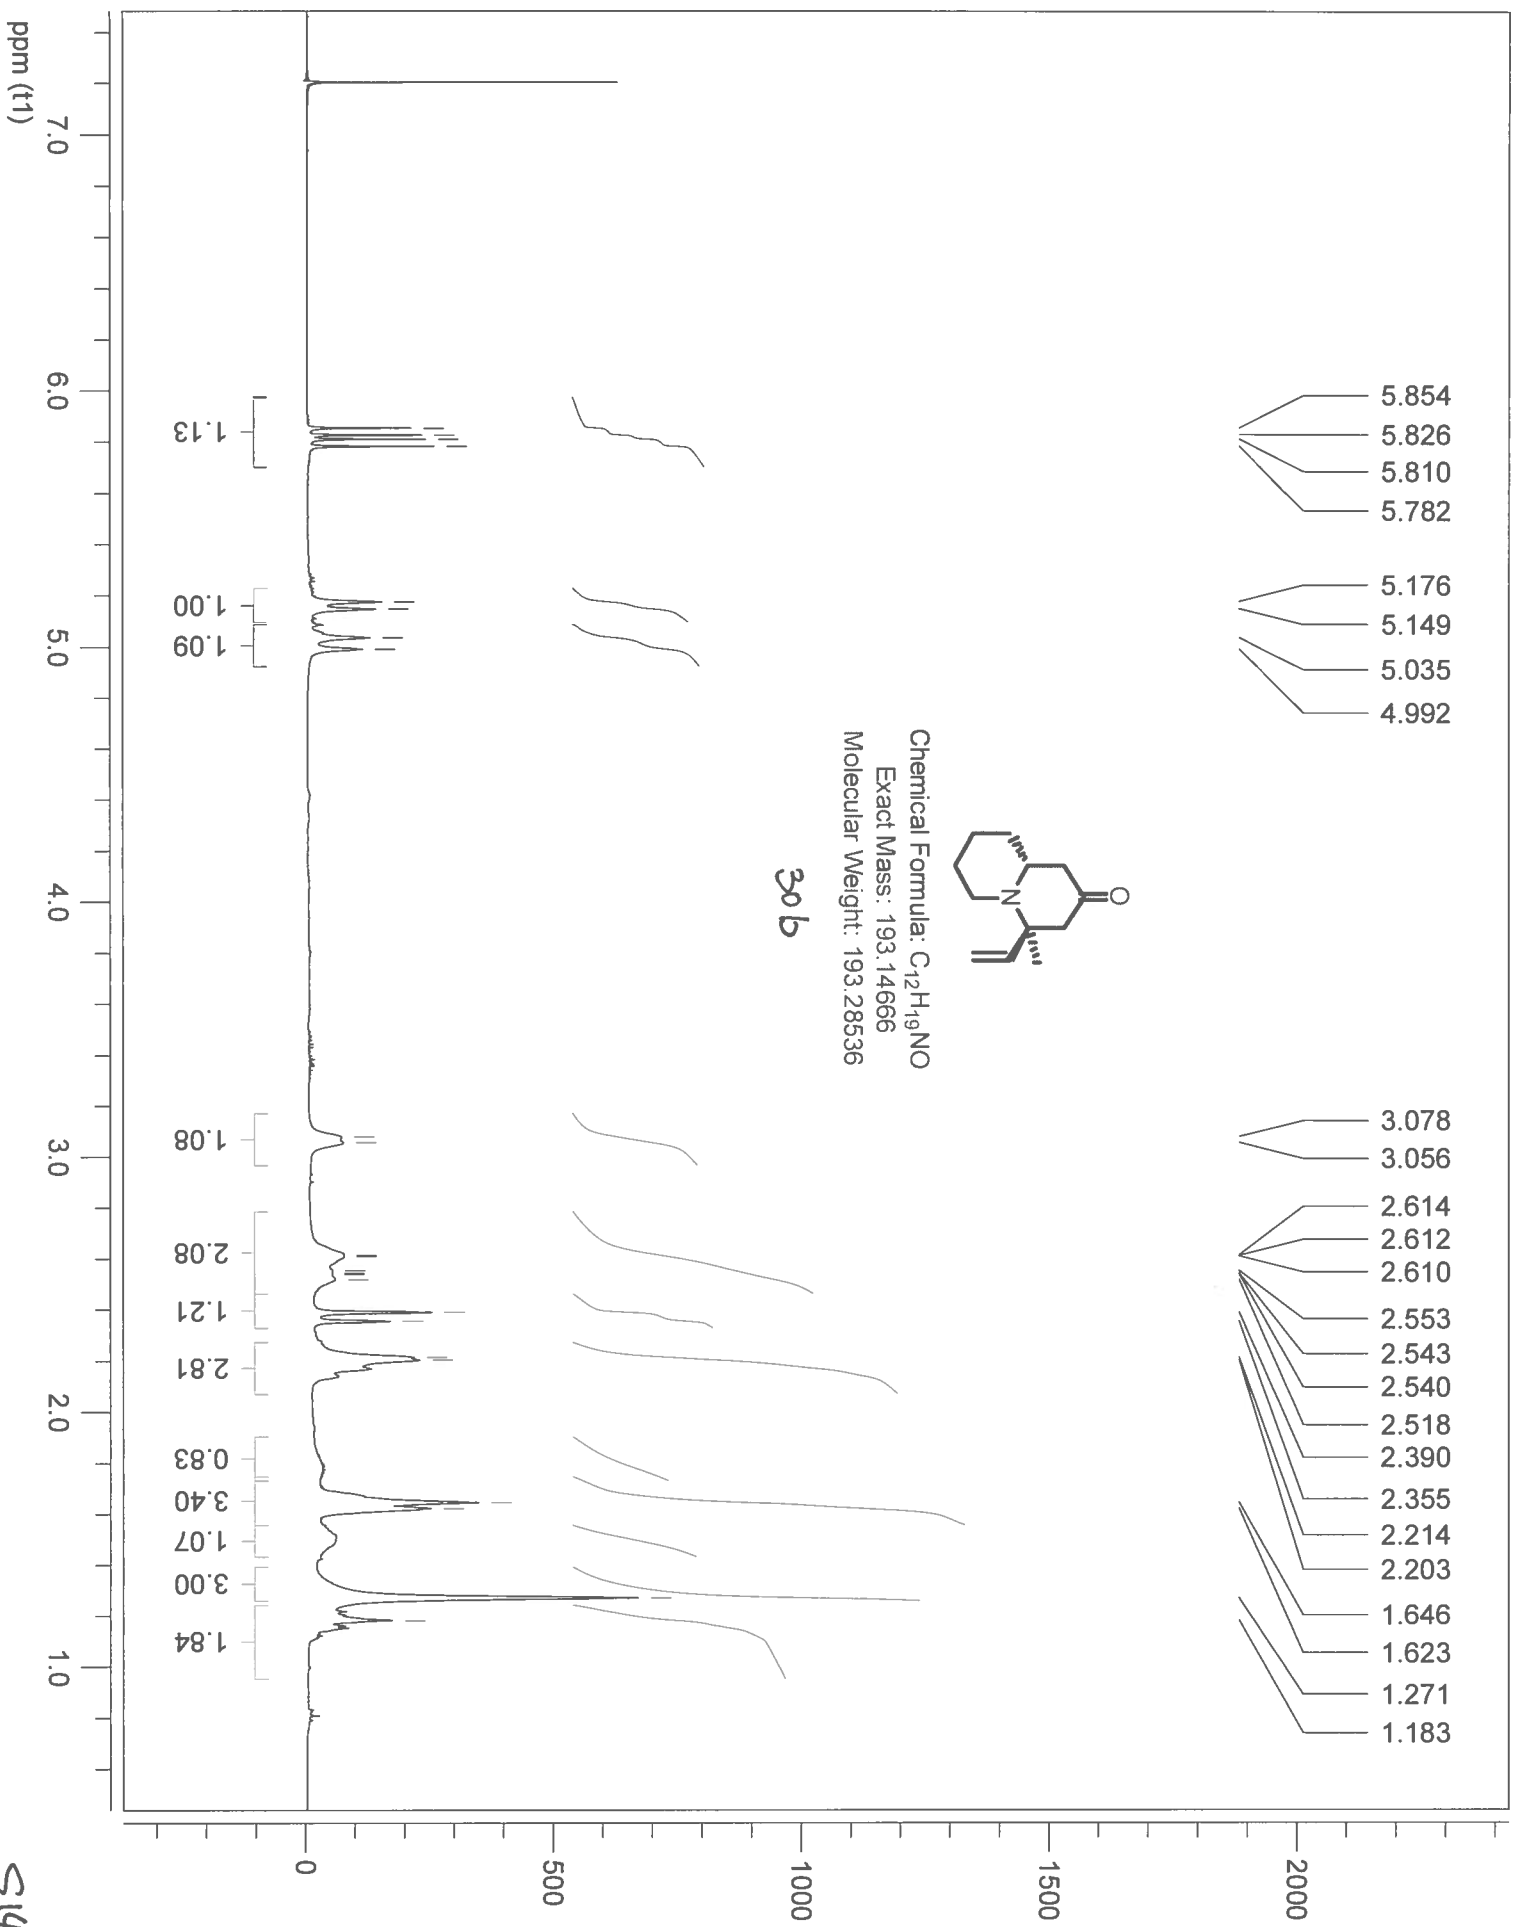

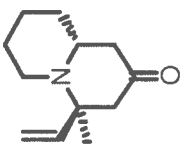

Chemical Formula:  $C_{12}H_{19}NO$   
Exact Mass: 193.14666  
Molecular Weight: 193.28536

30b

137.102

116.555

61.205

55.133

51.977

47.553

44.958

34.293

26.583

25.815

23.293

ppm ( $t_1$ )

S15



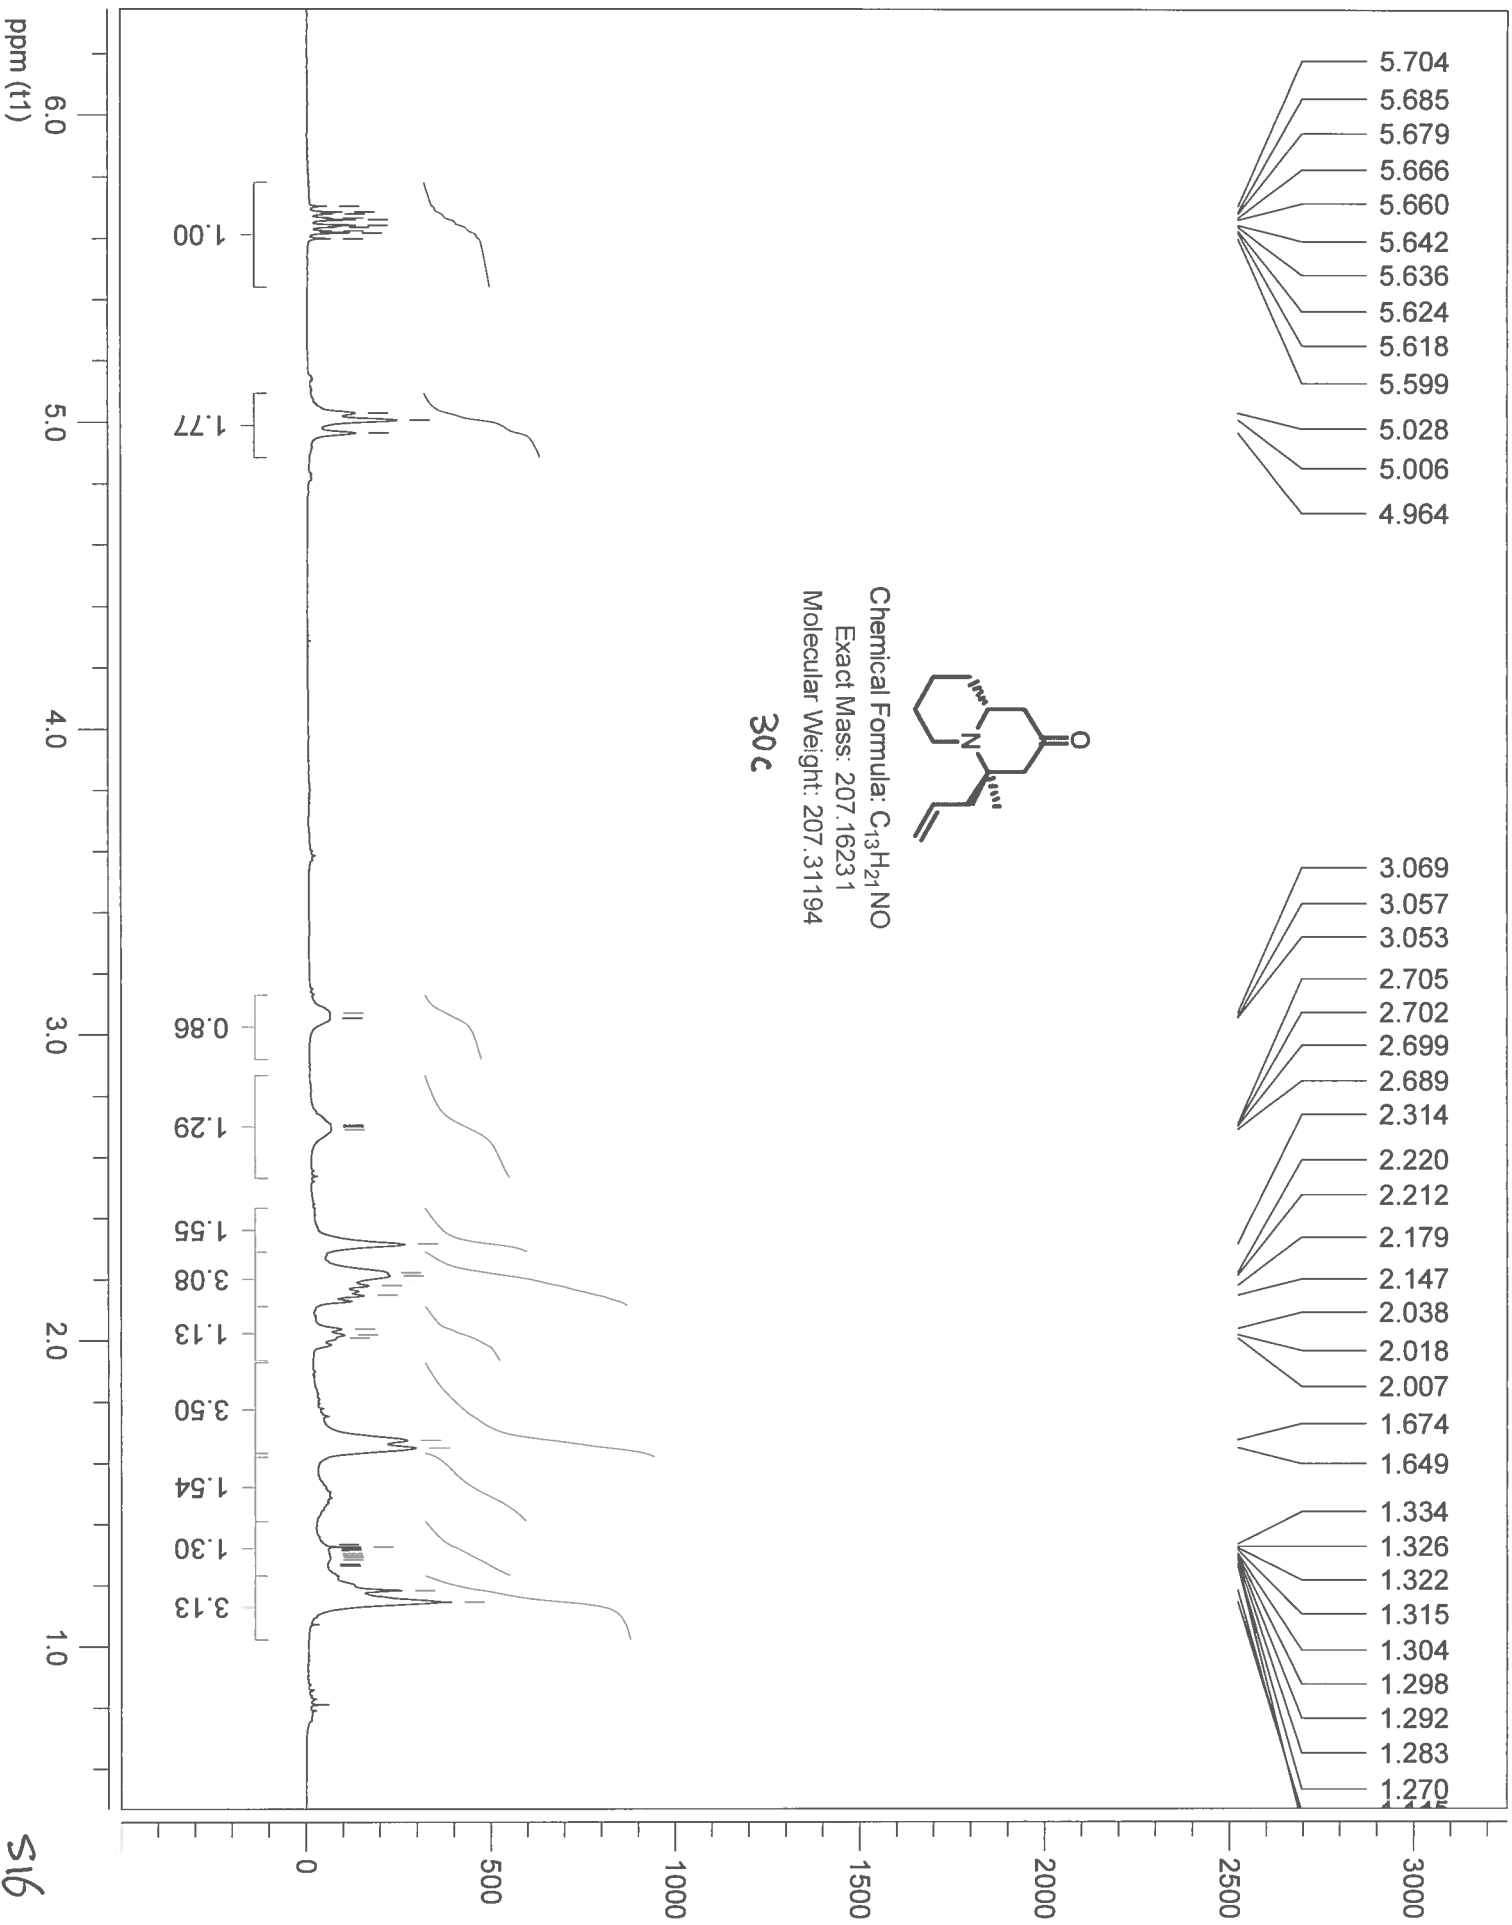

yy-vb-94

— 209.94

— 133.84

— 118.66

— 61.04

— 55.72

— 51.76

— 48.41

— 45.38

— 35.28

— 34.28

— 26.91

— 26.43

— 24.13

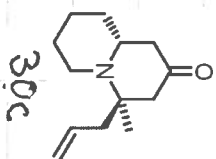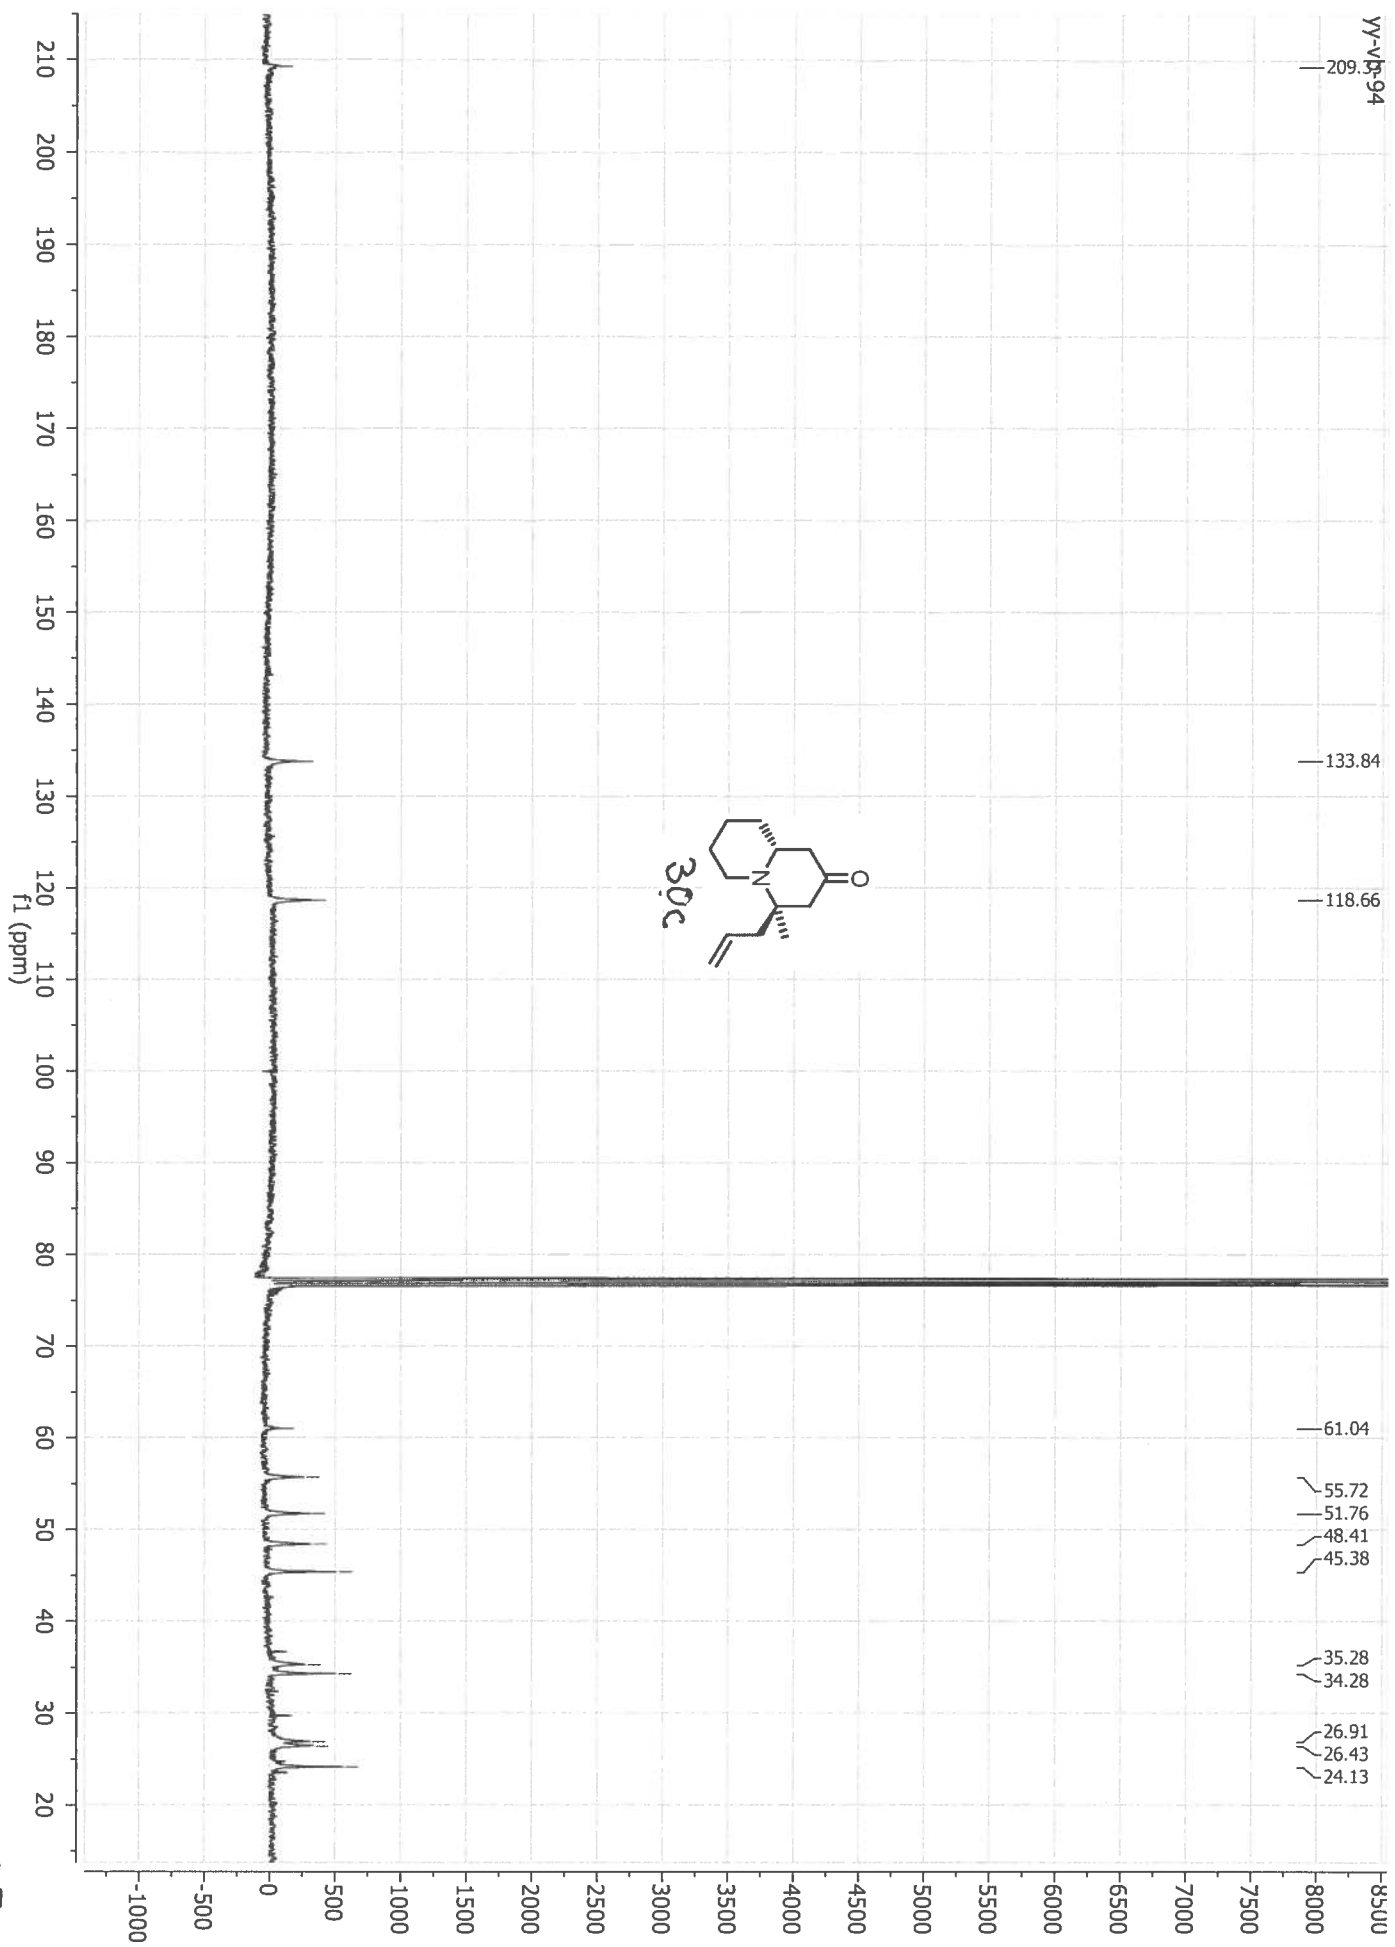

s17

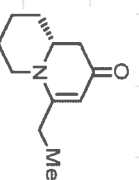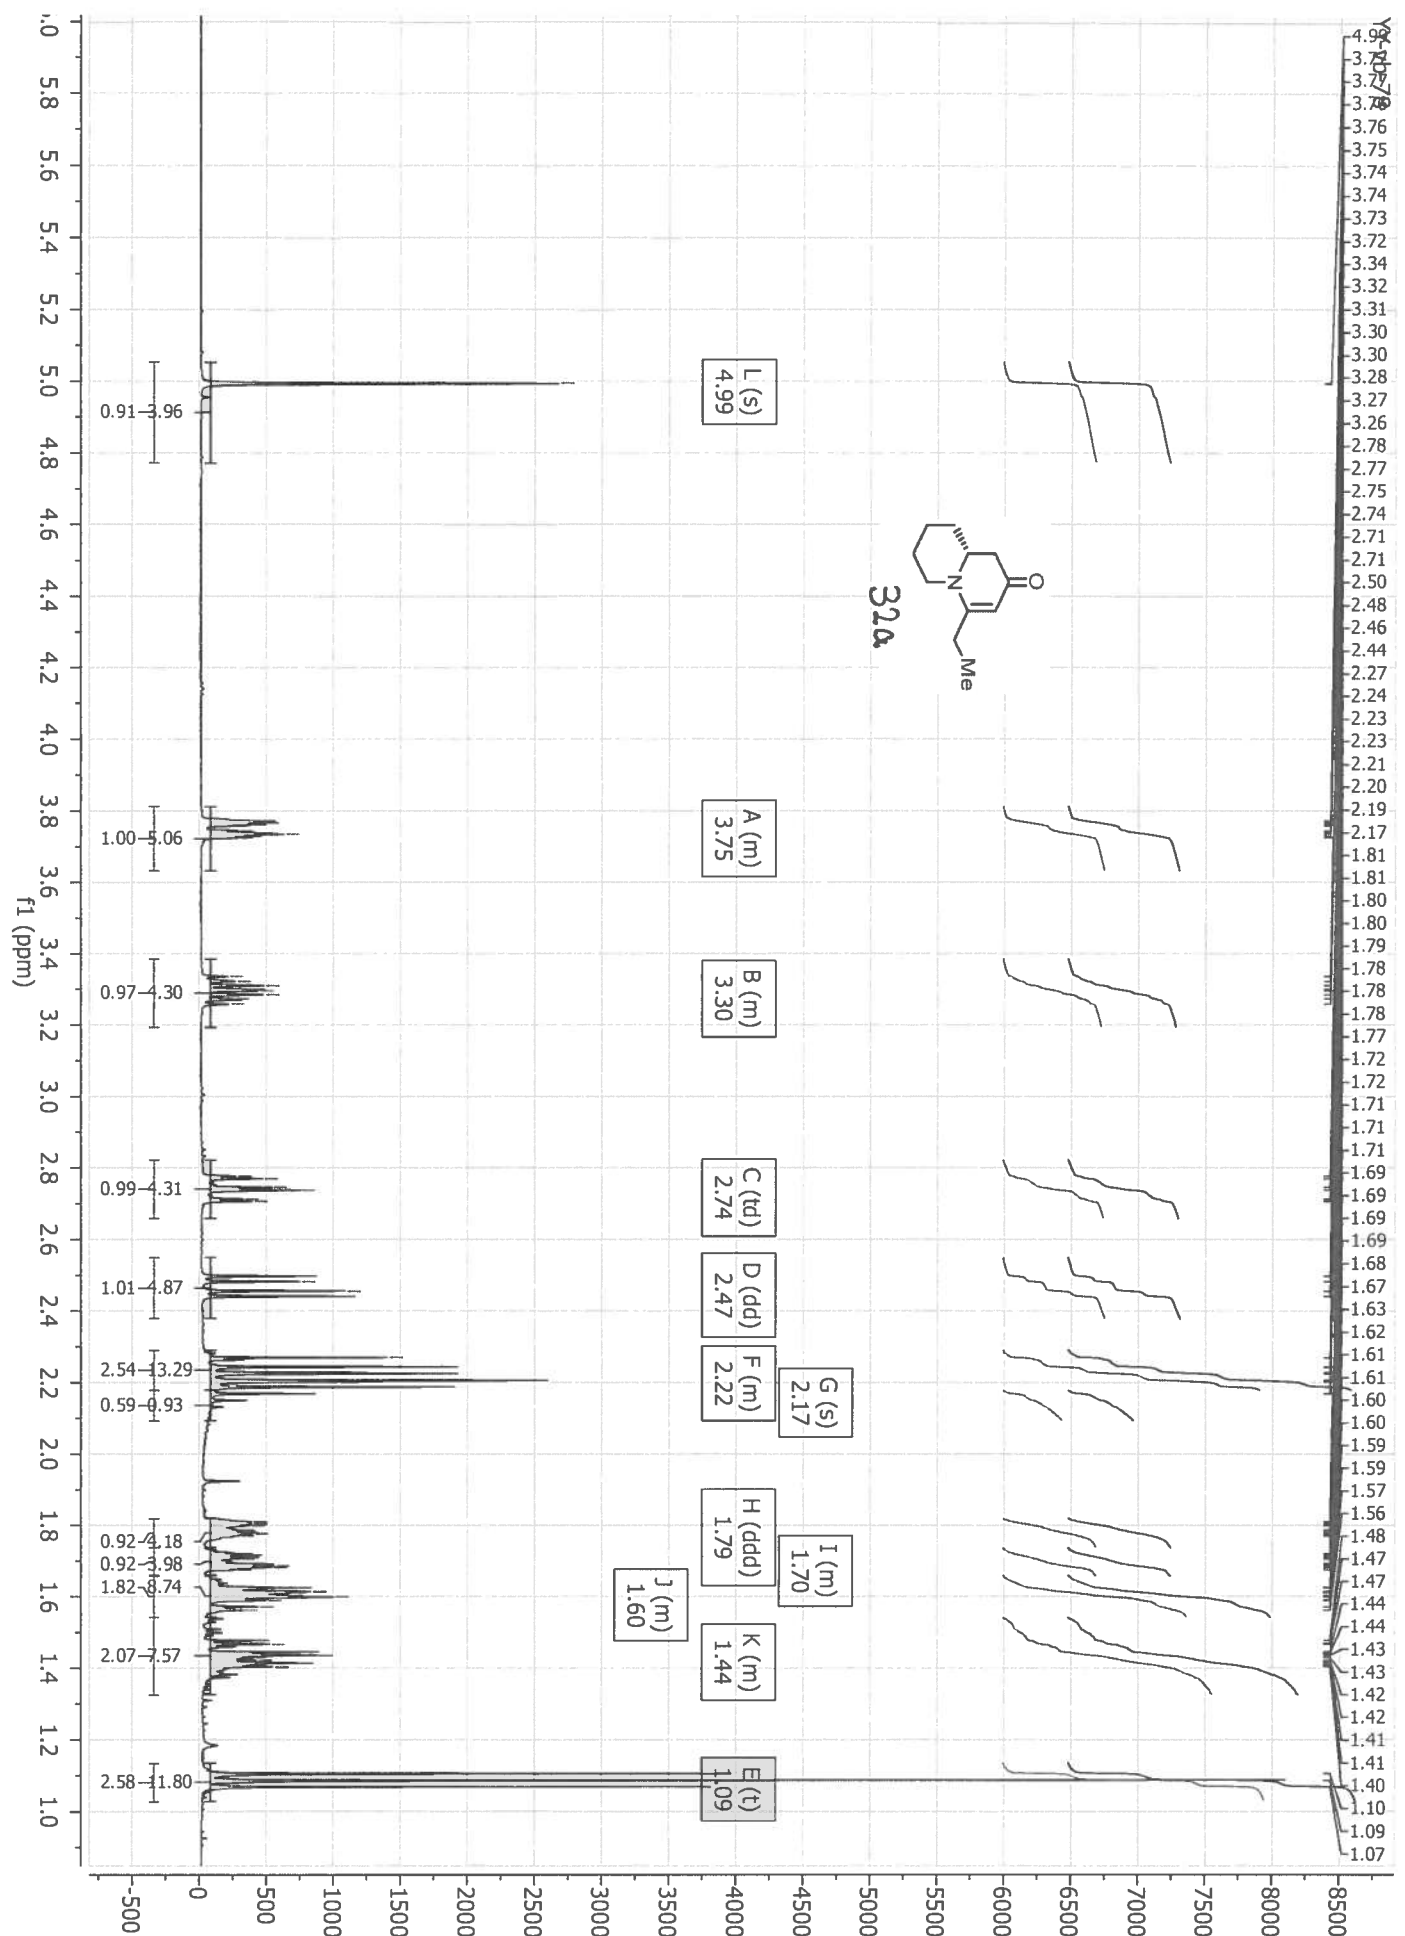

520

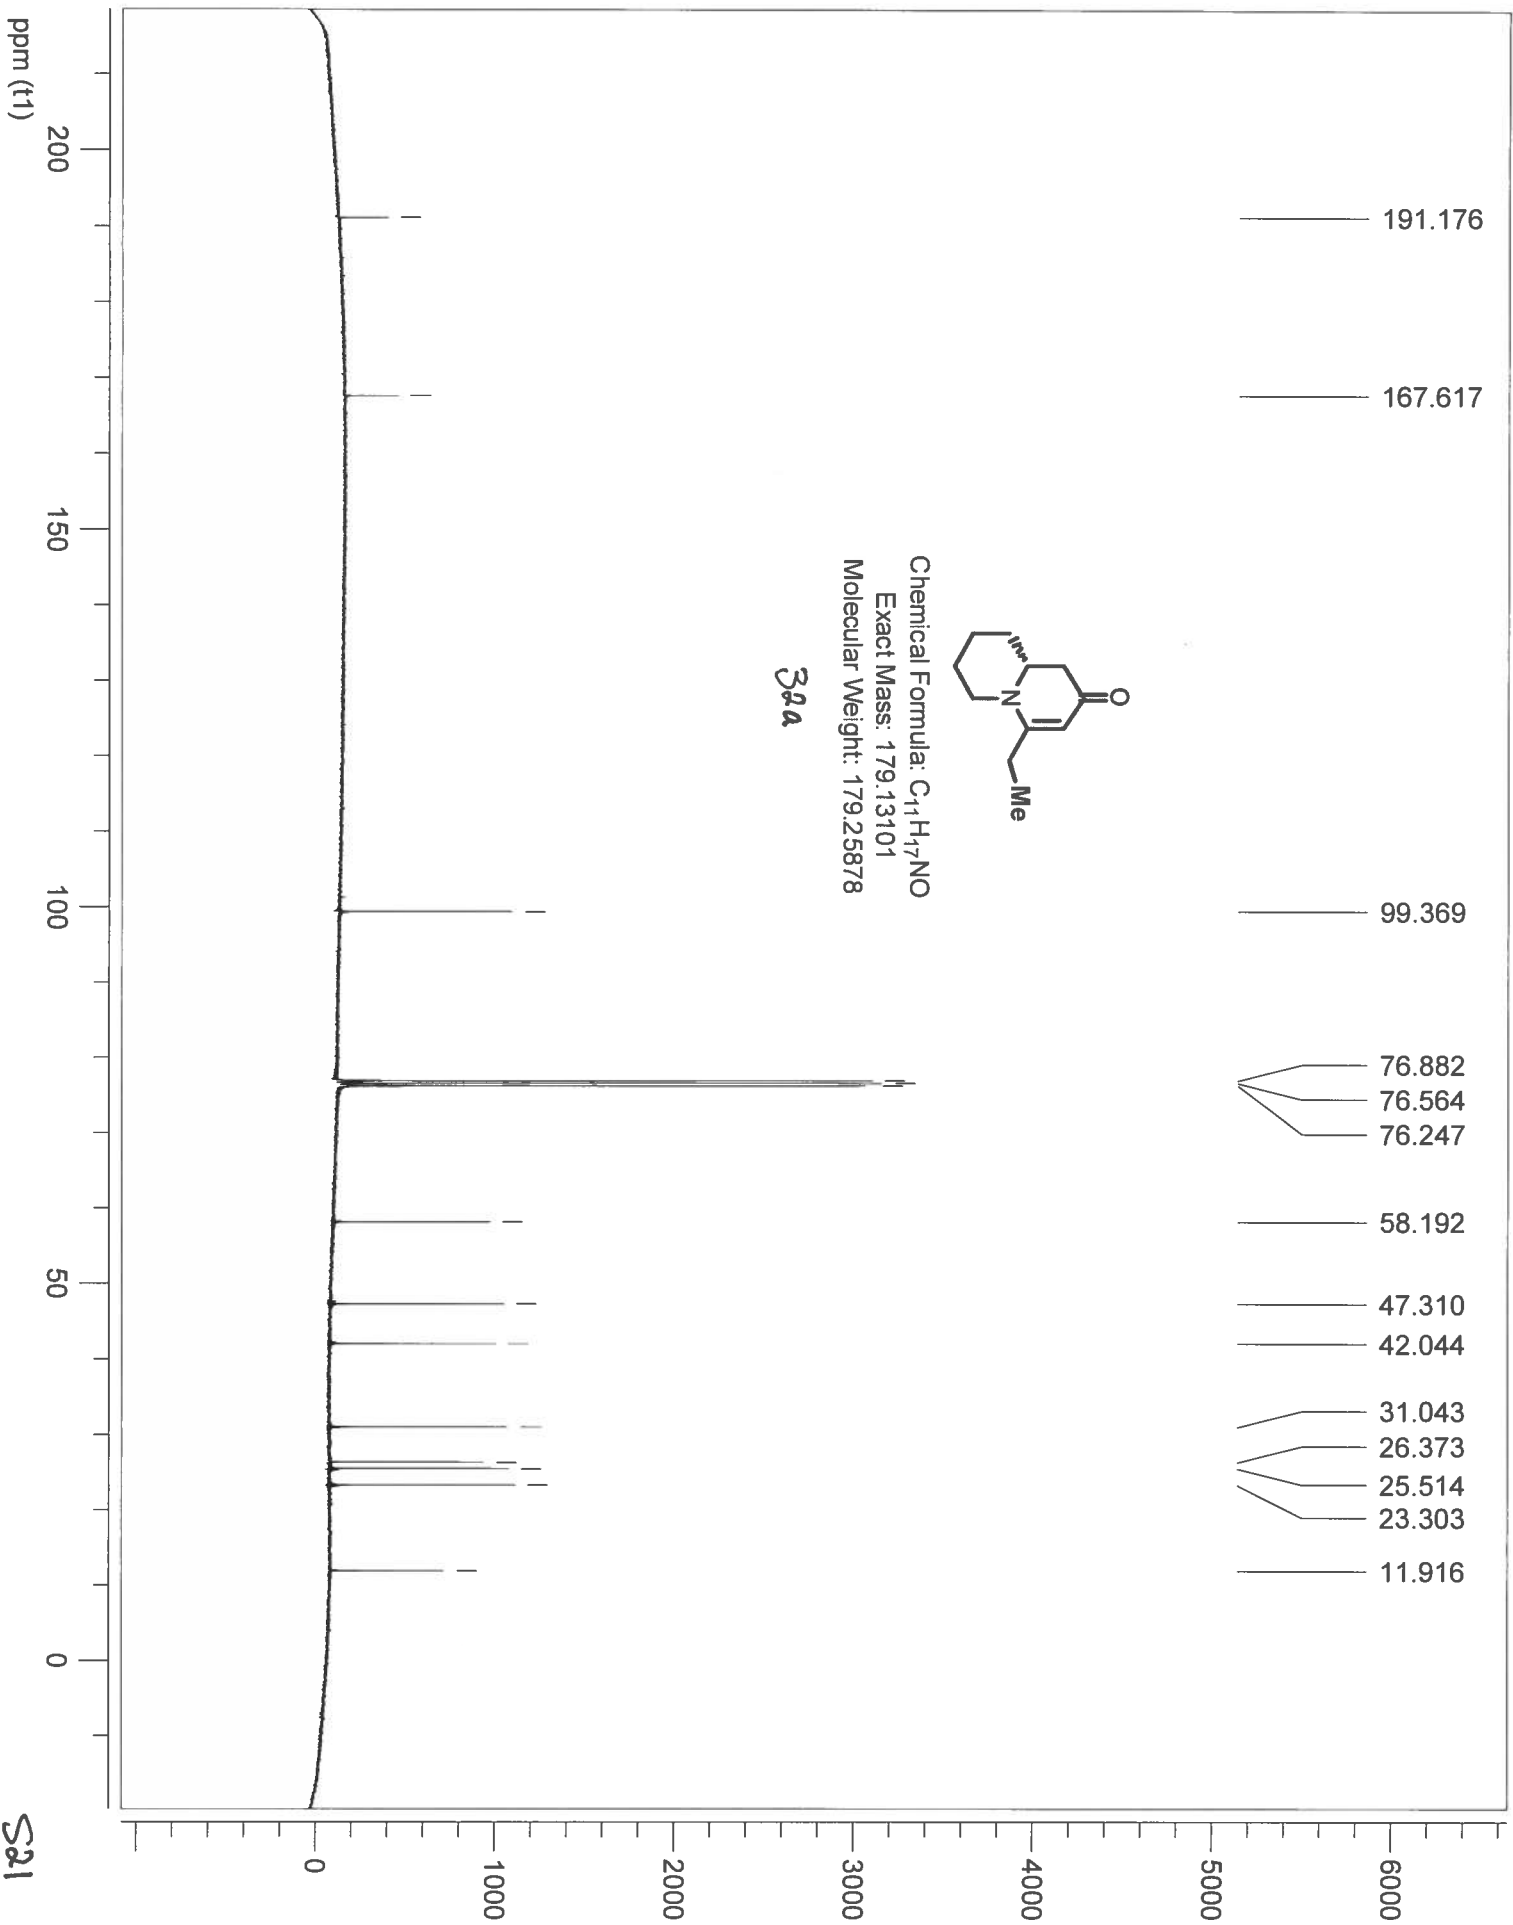

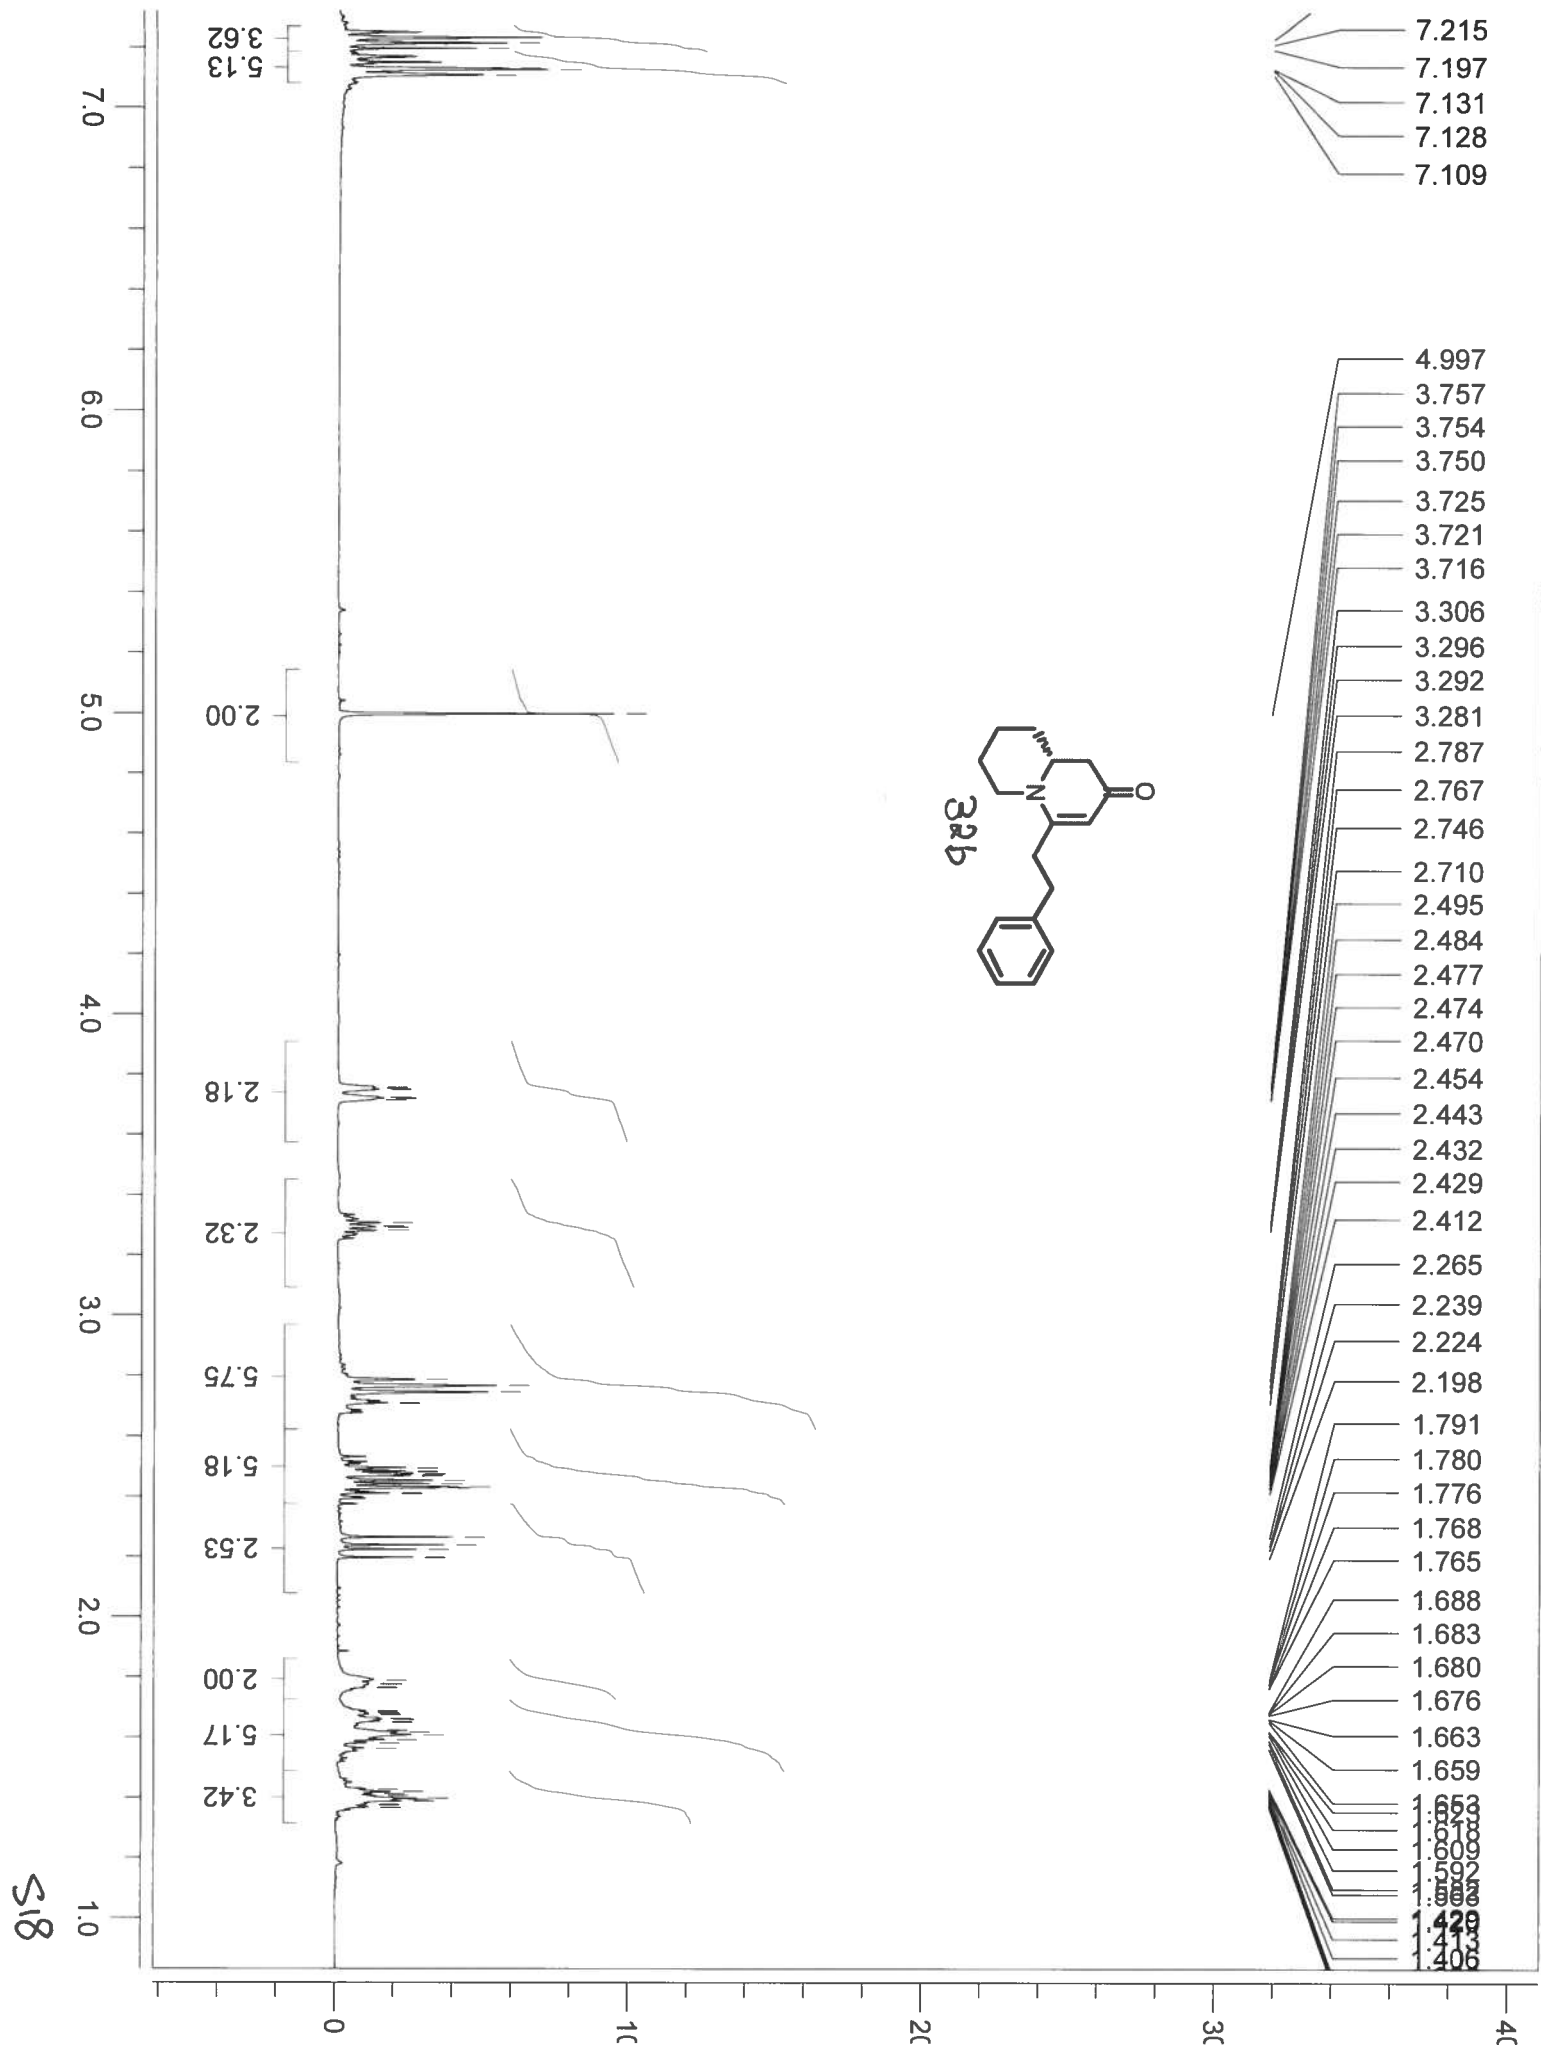

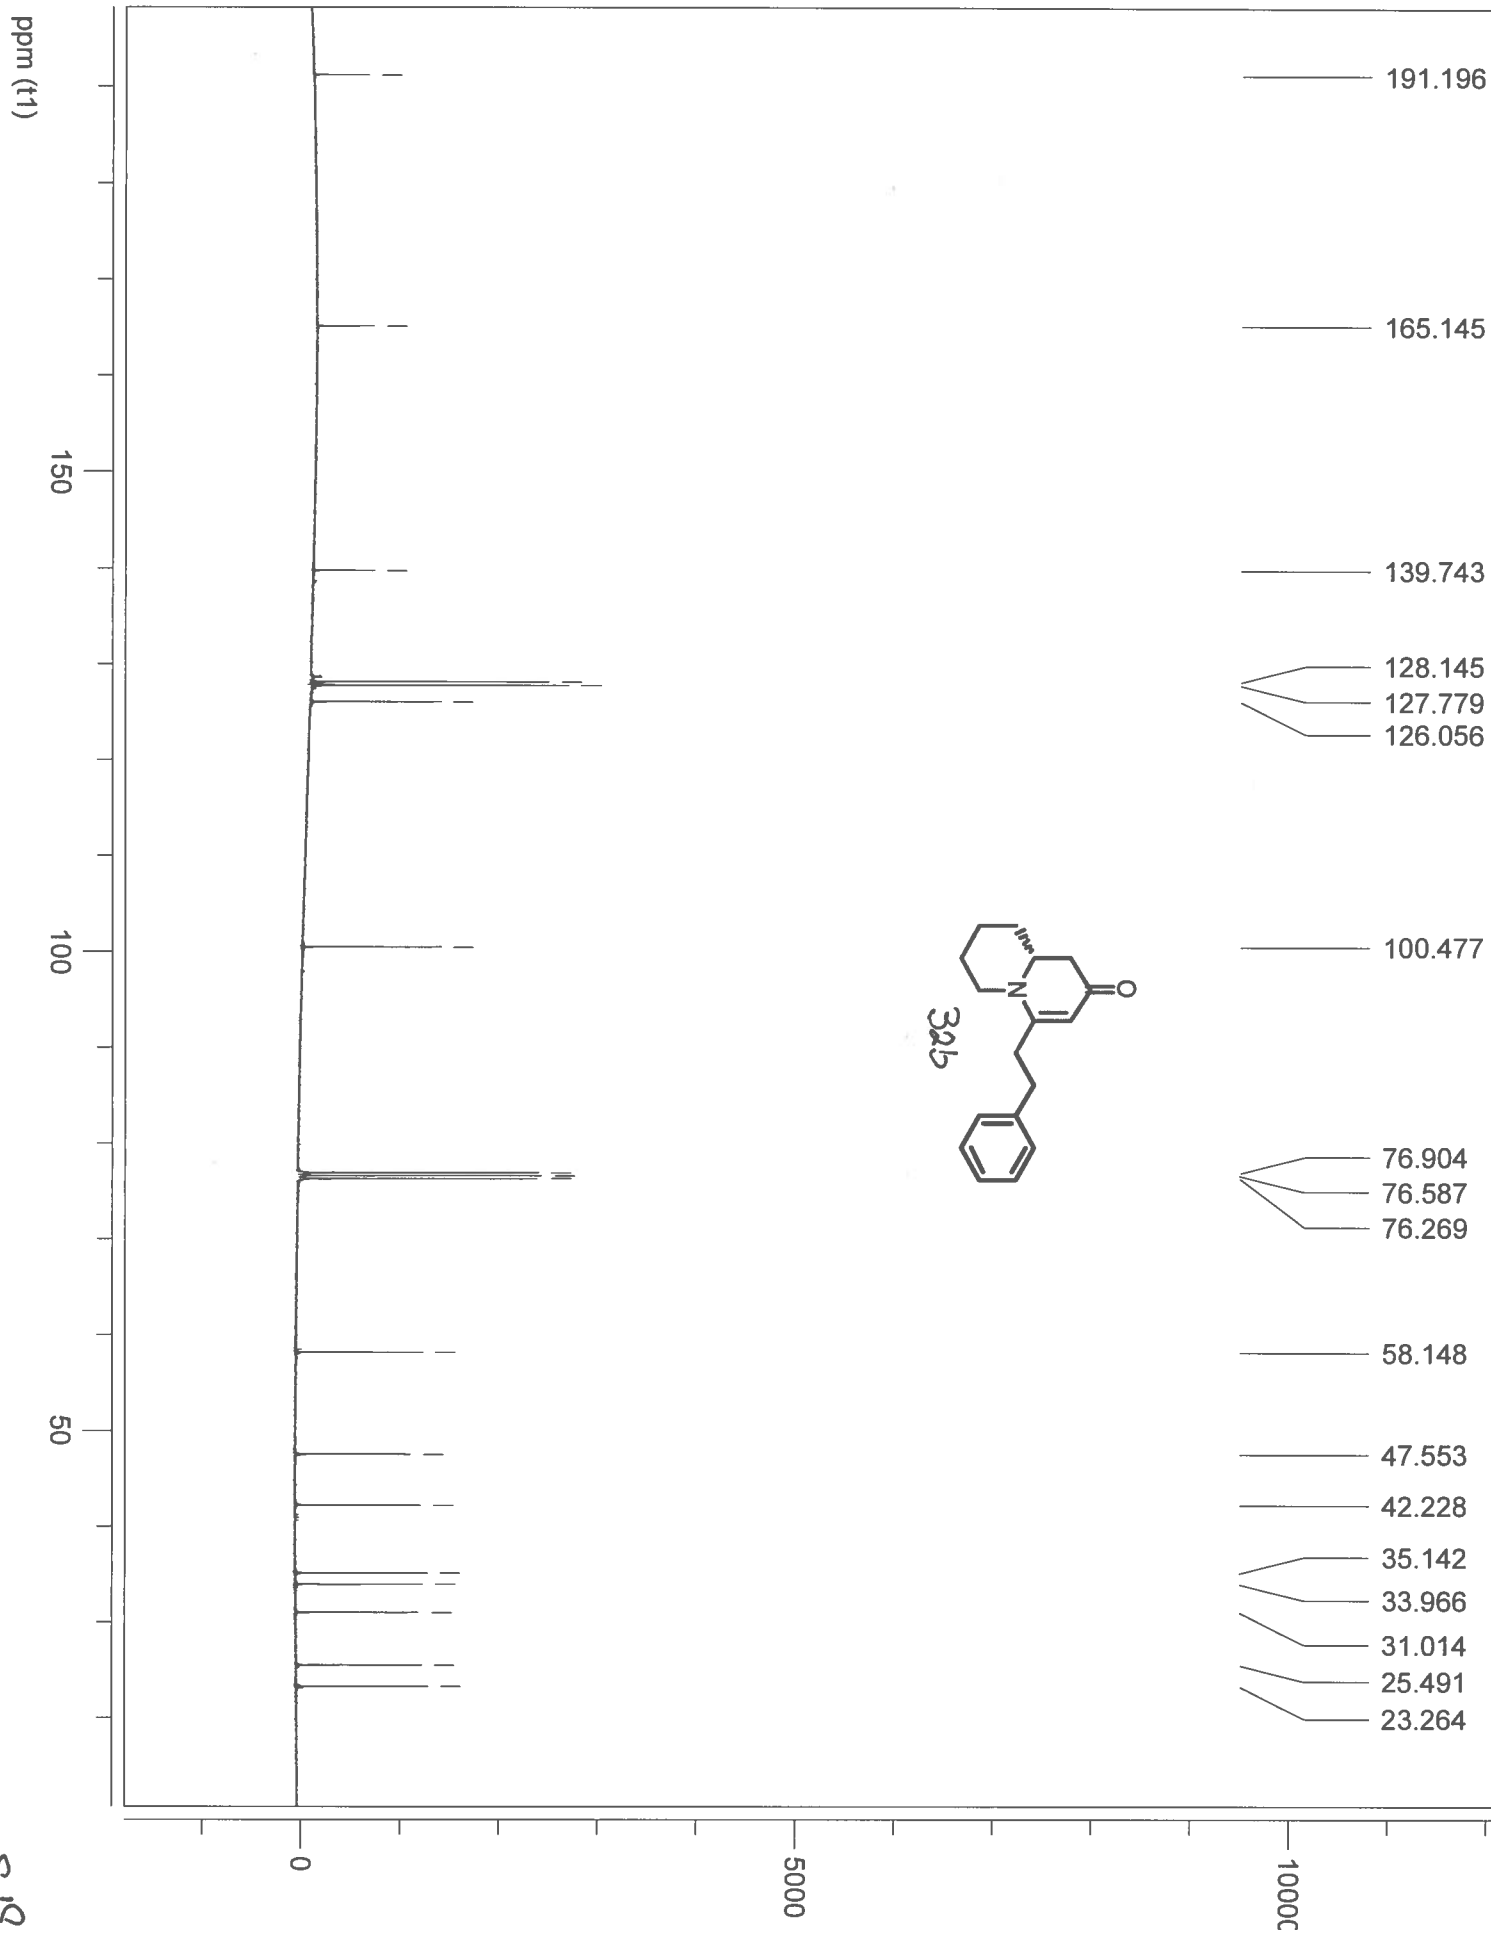

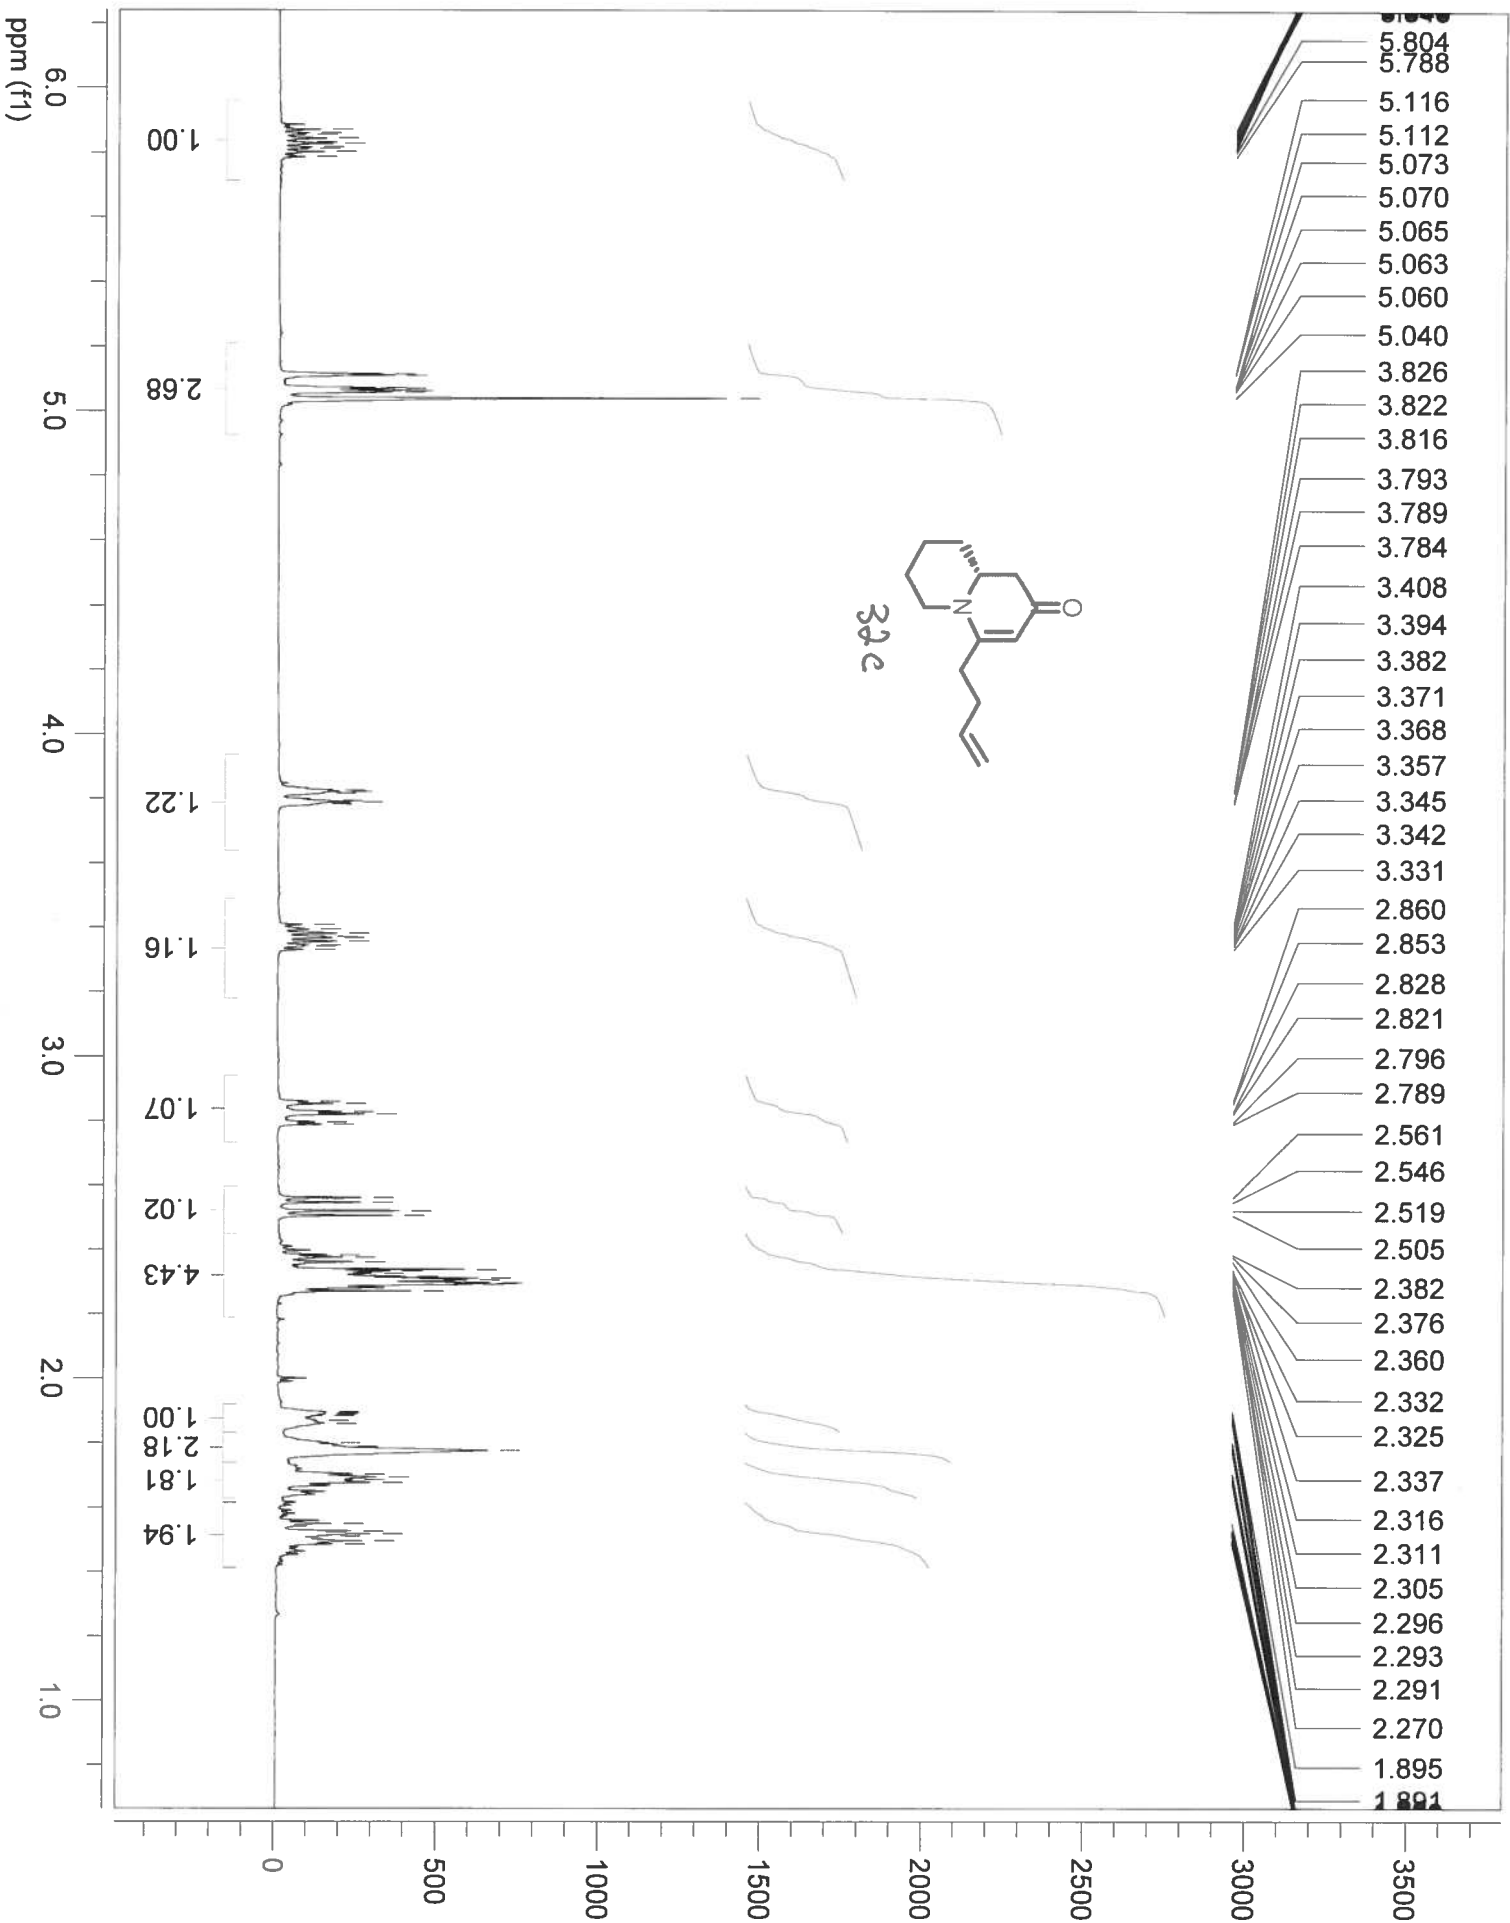

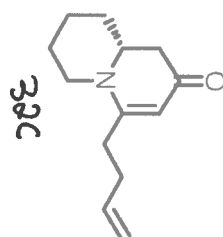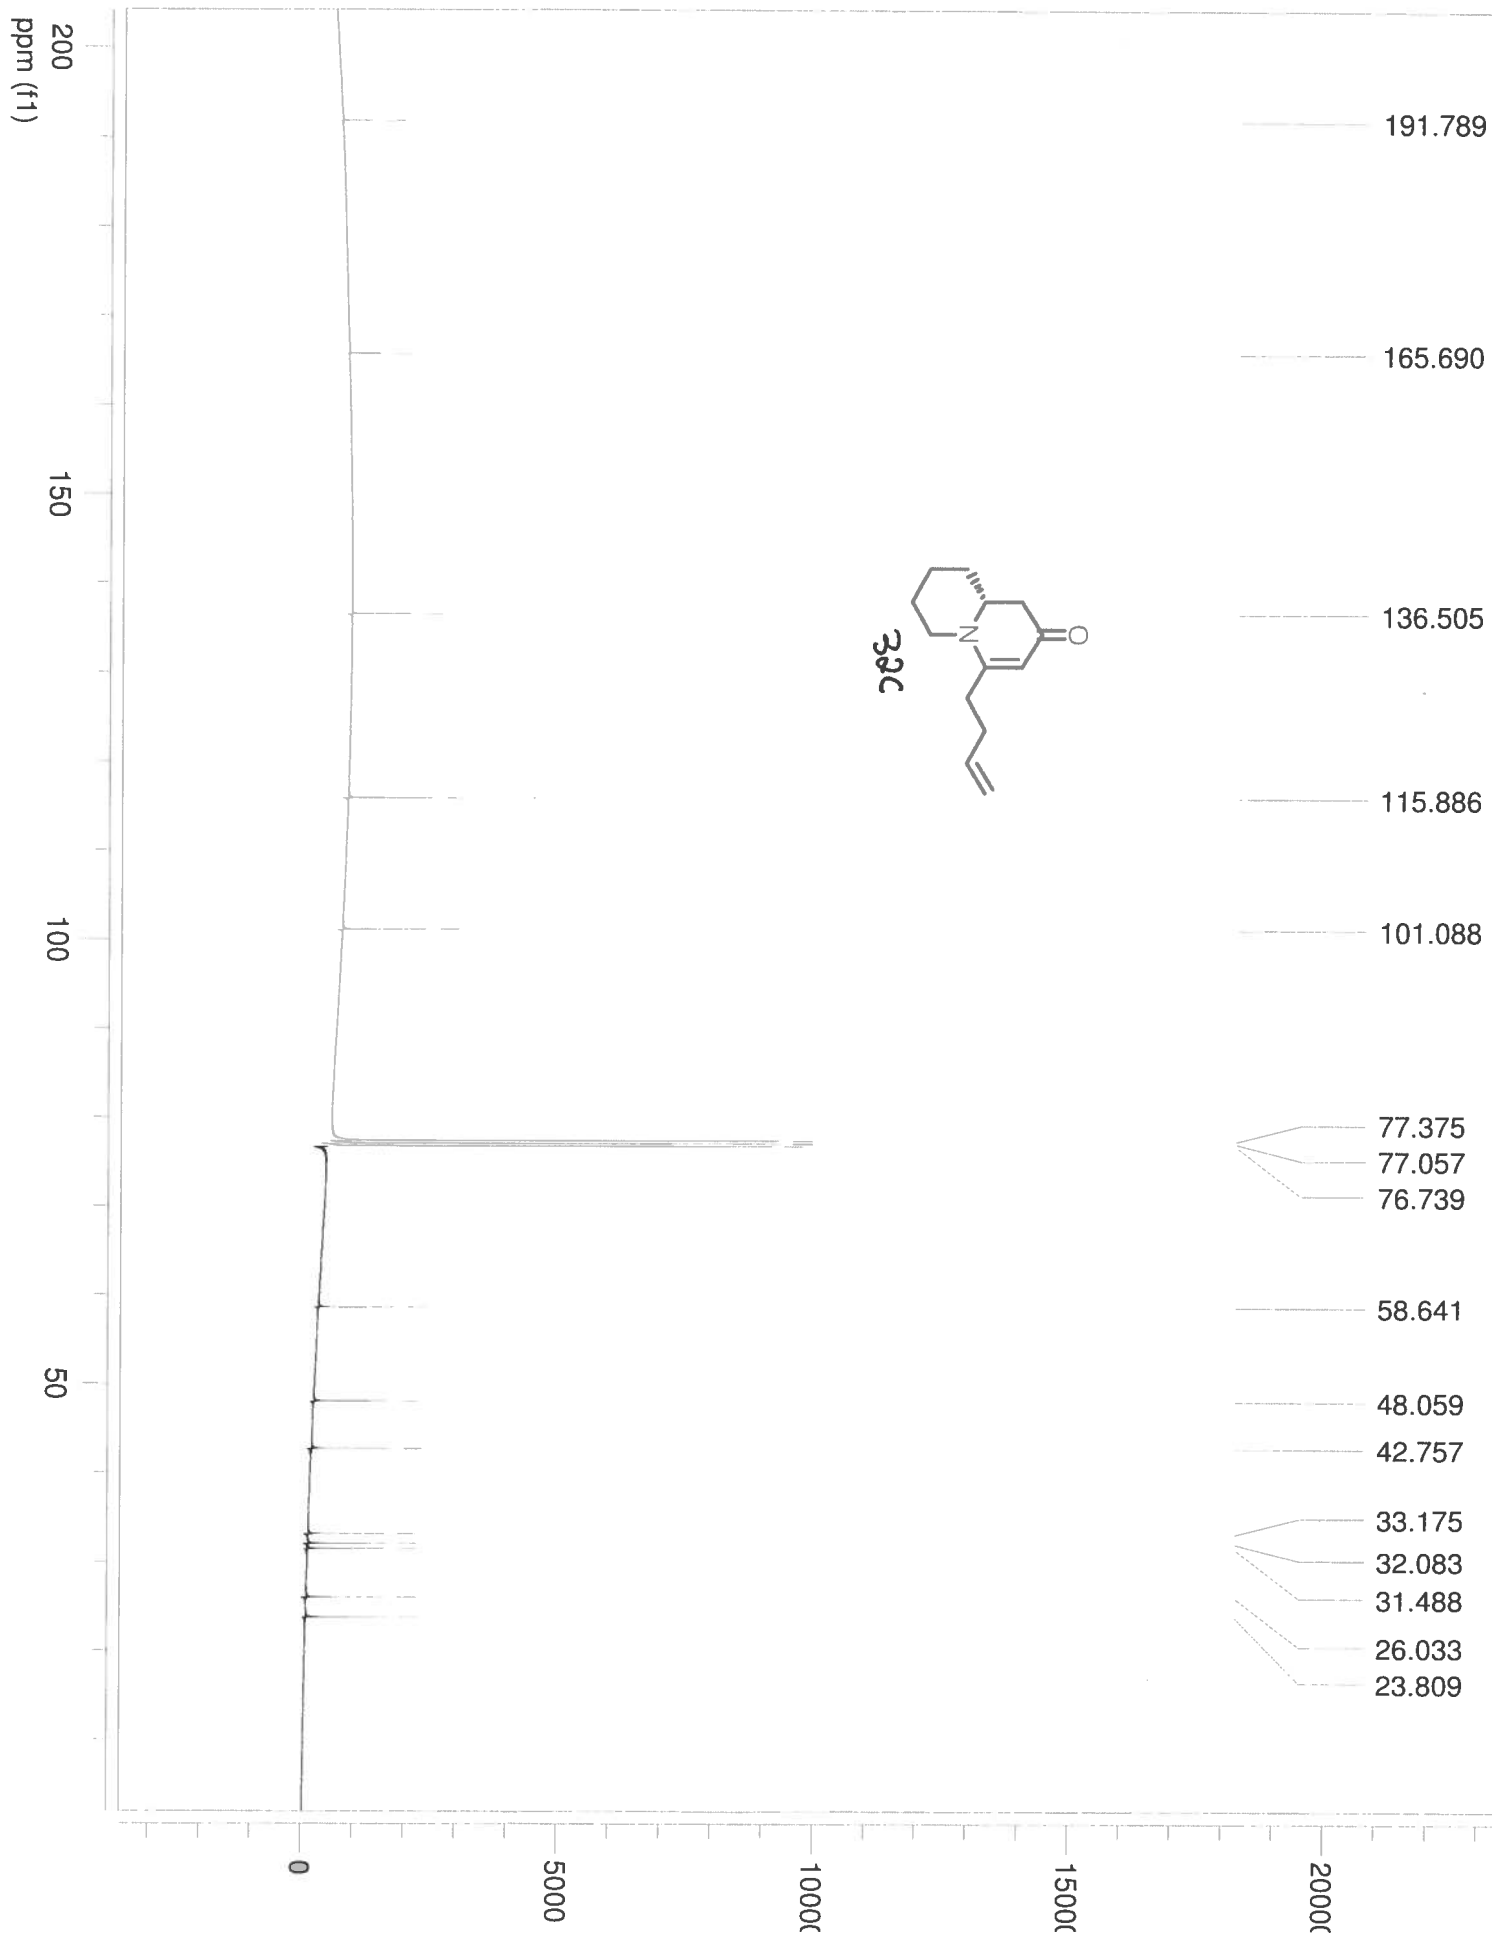



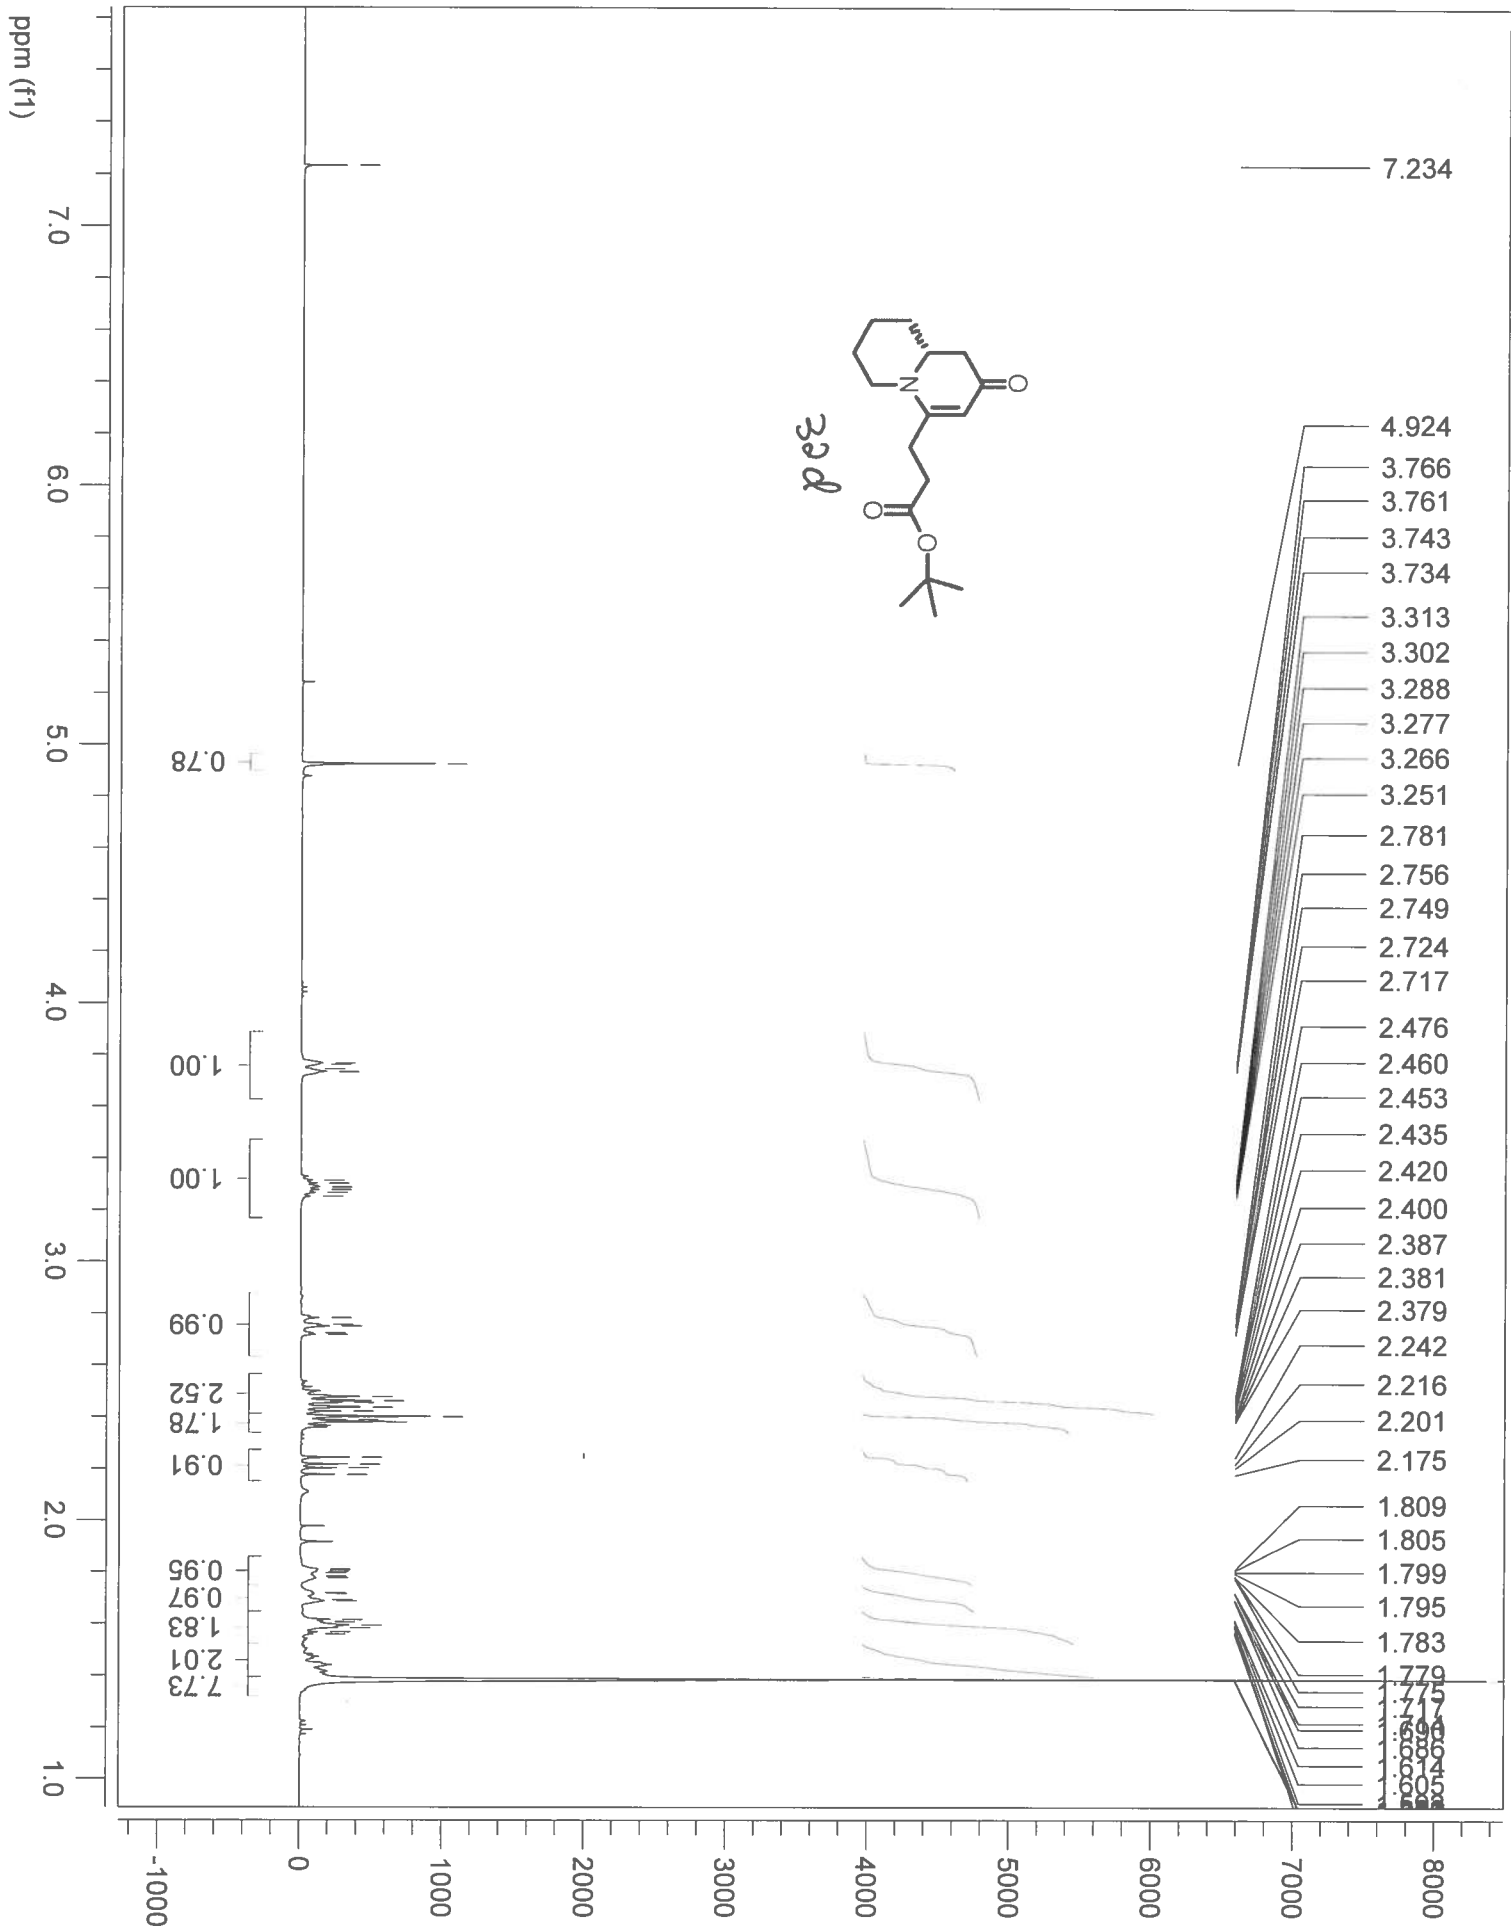

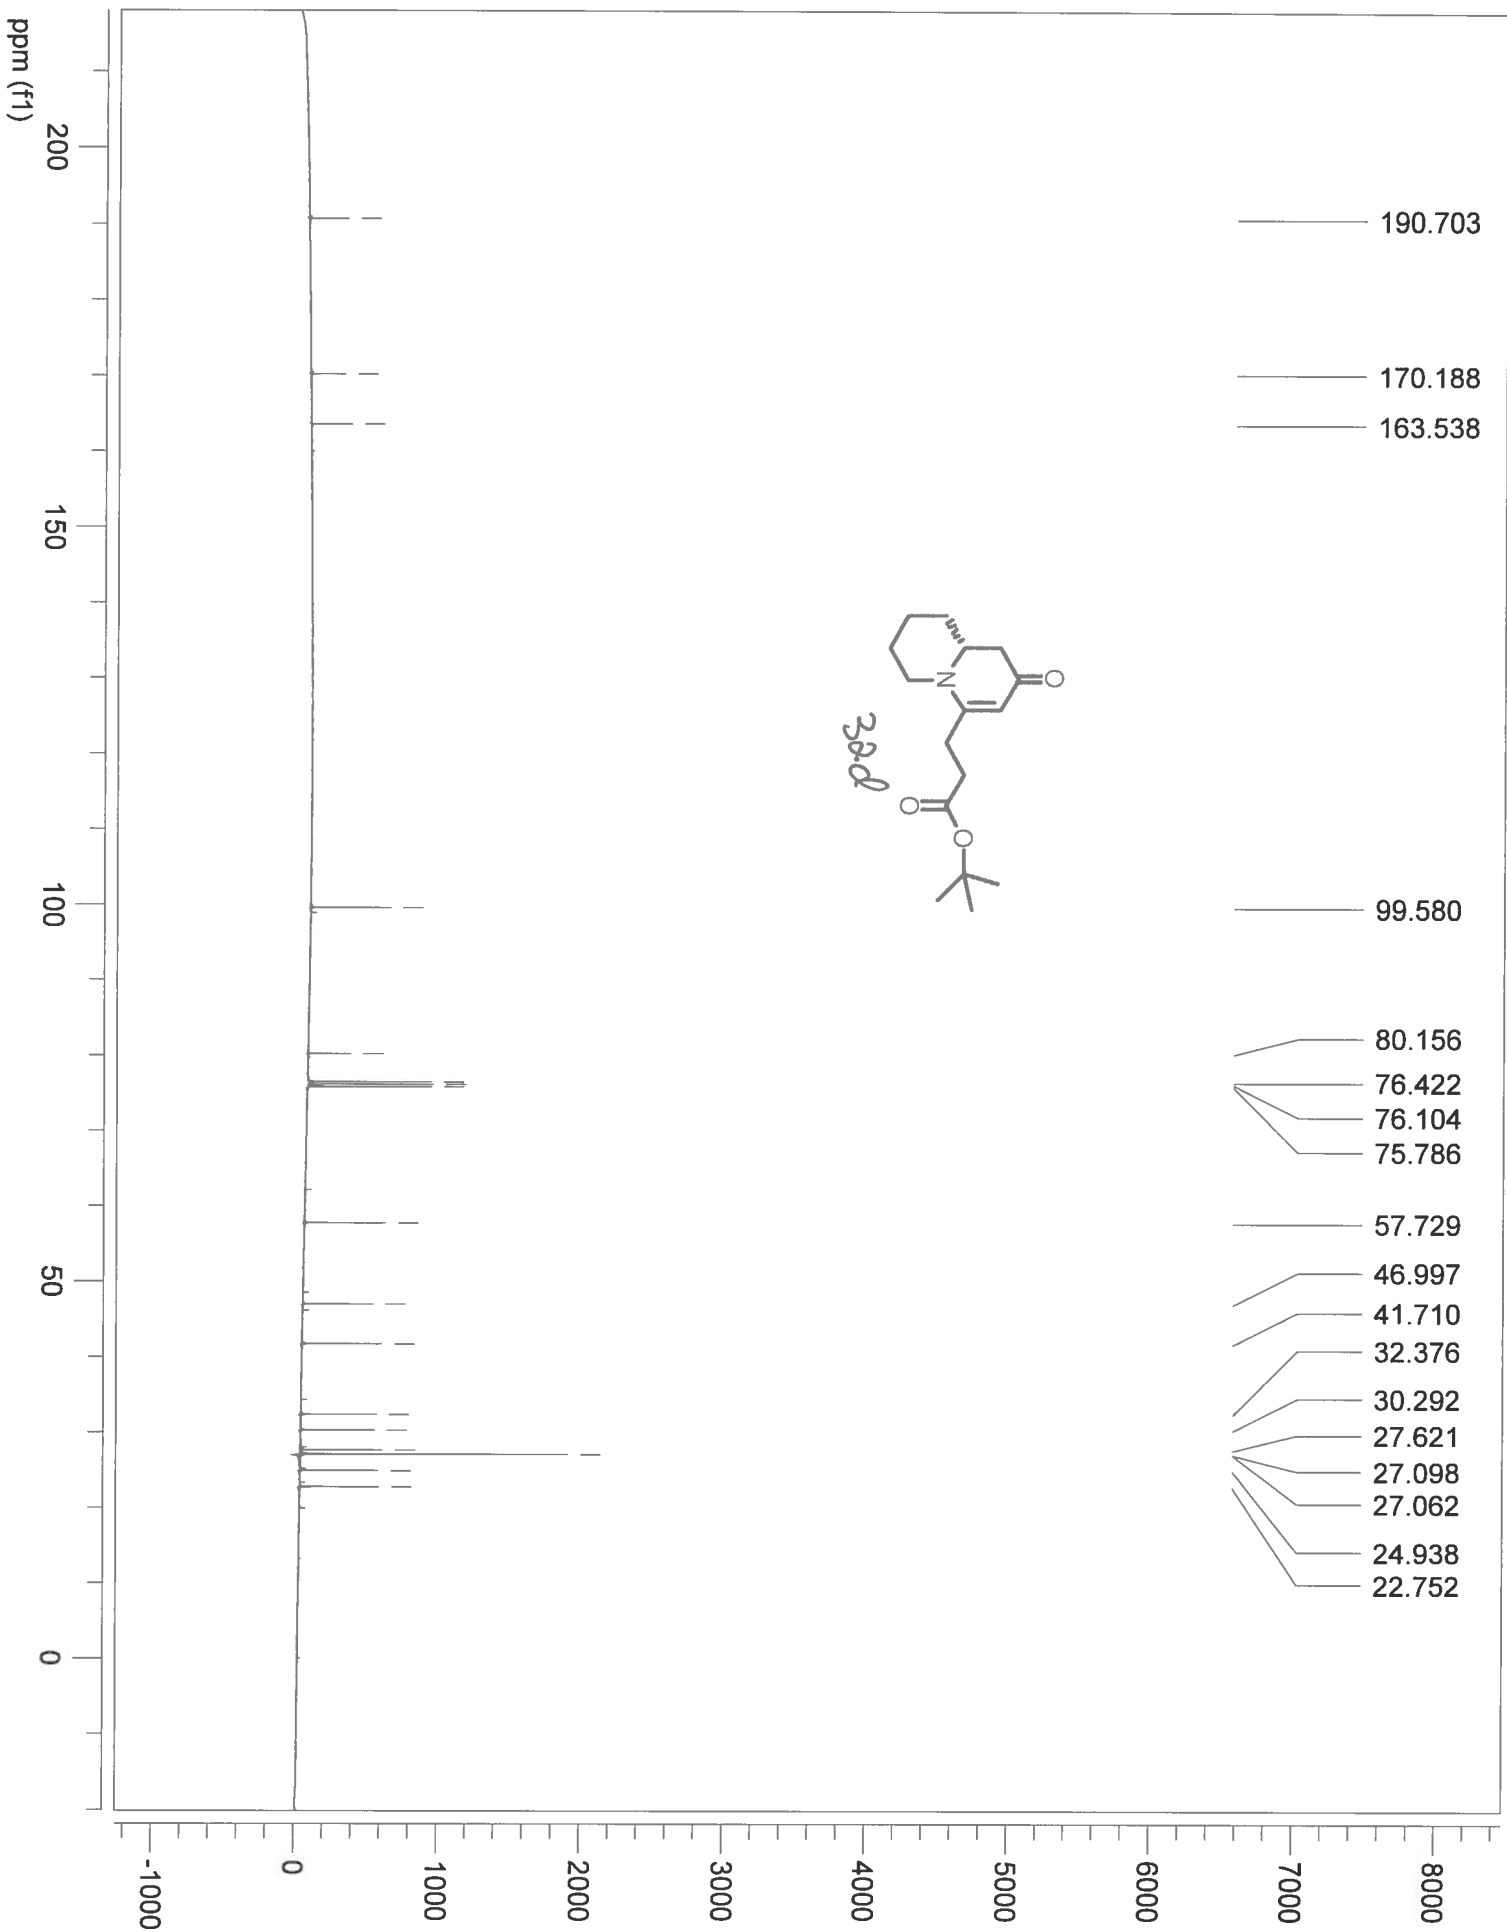

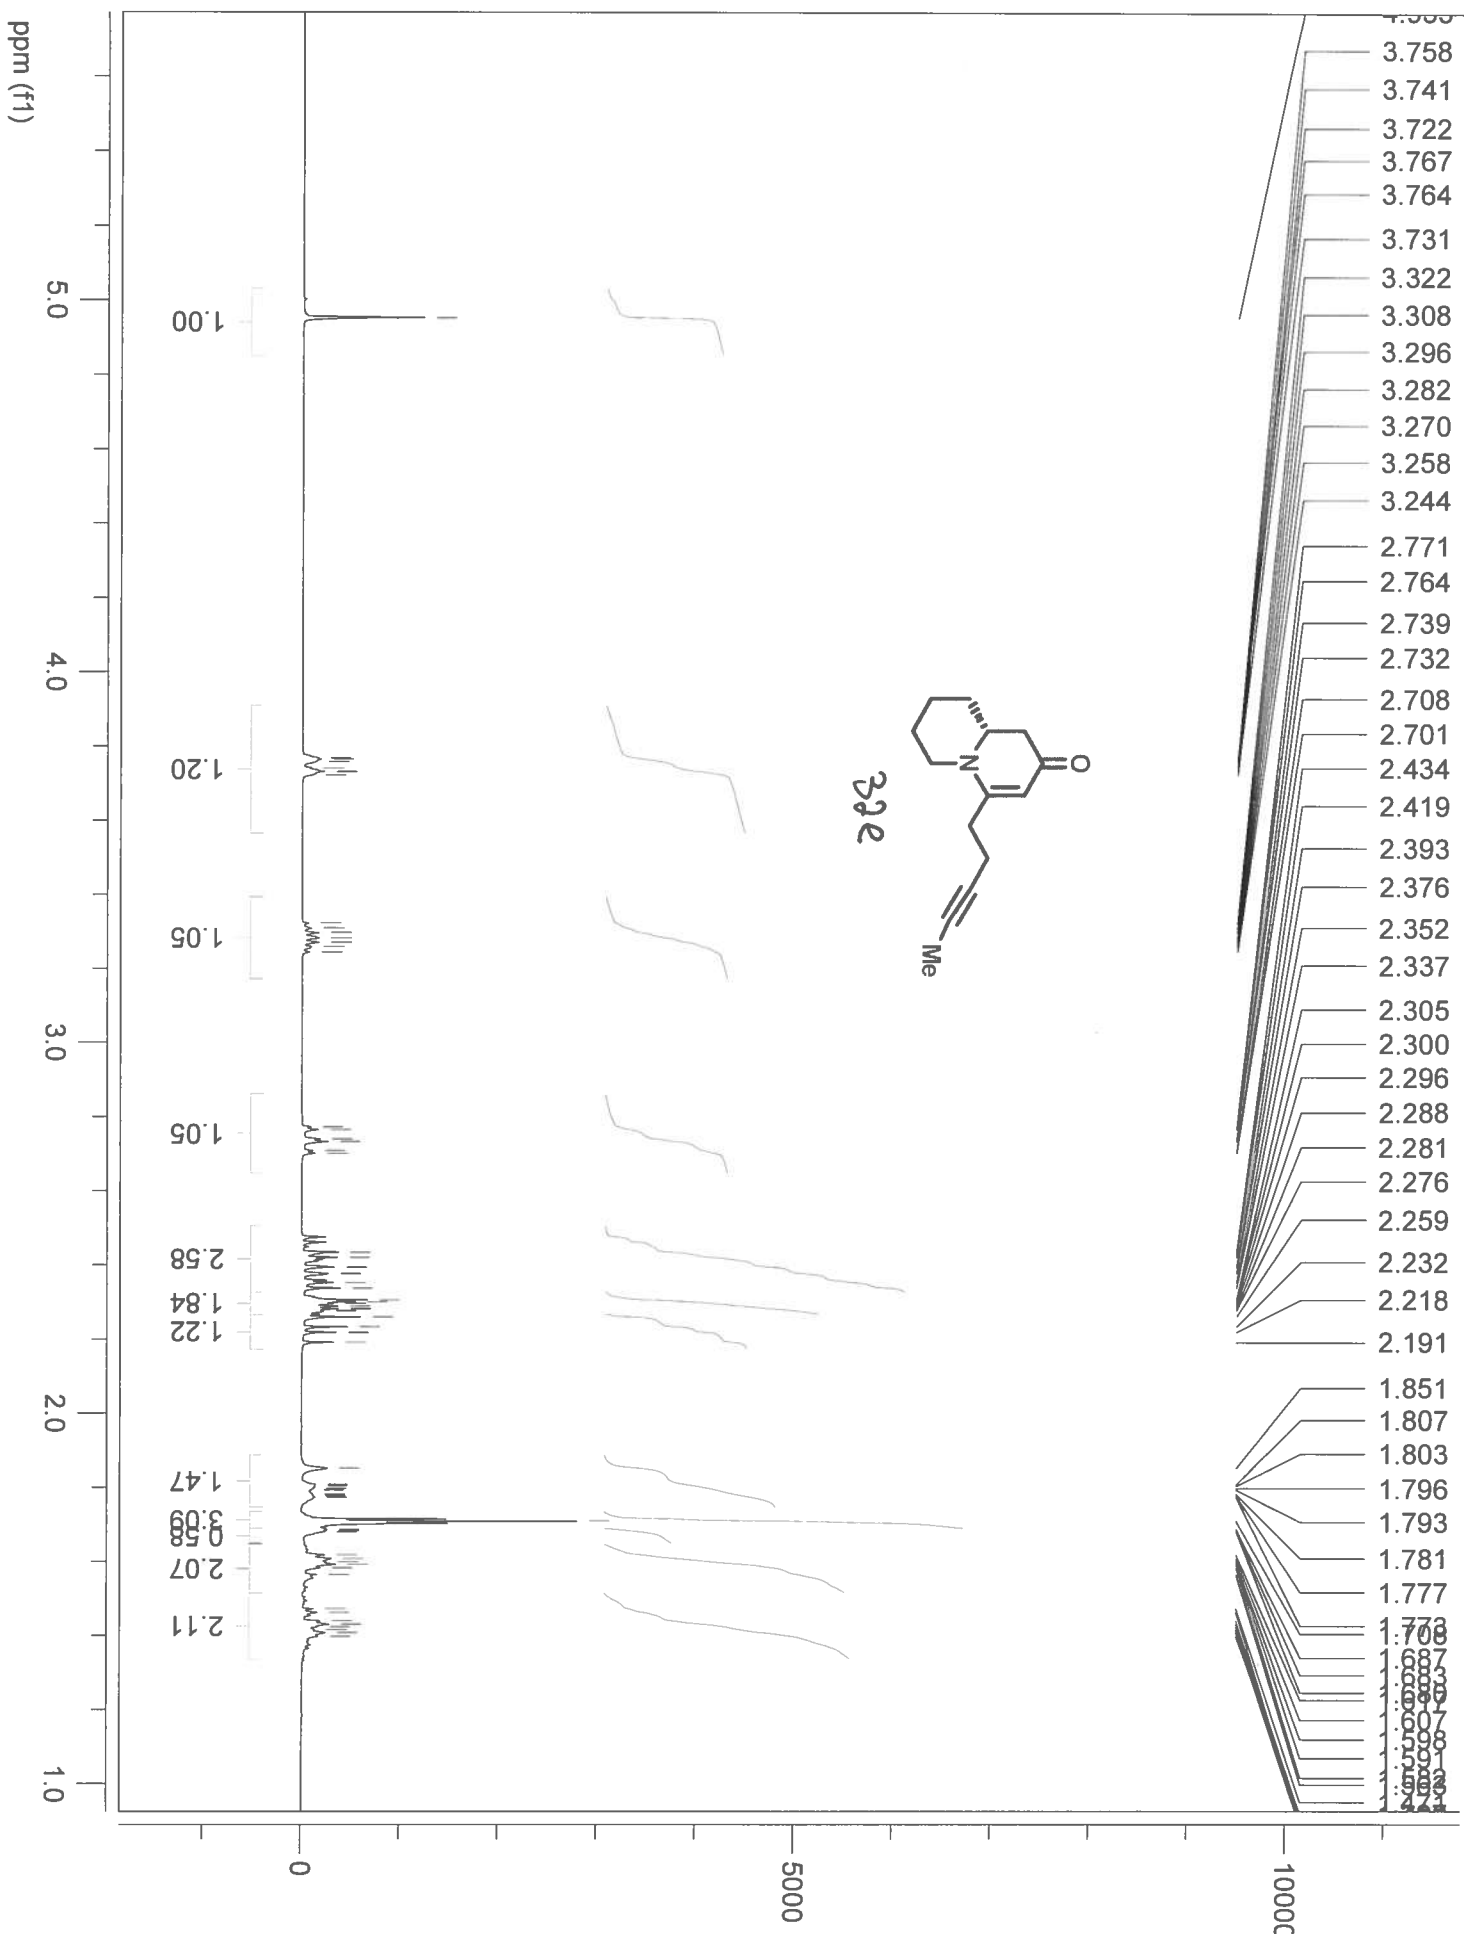

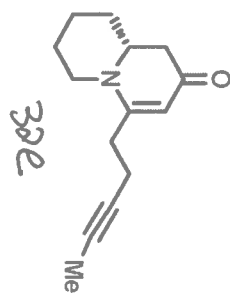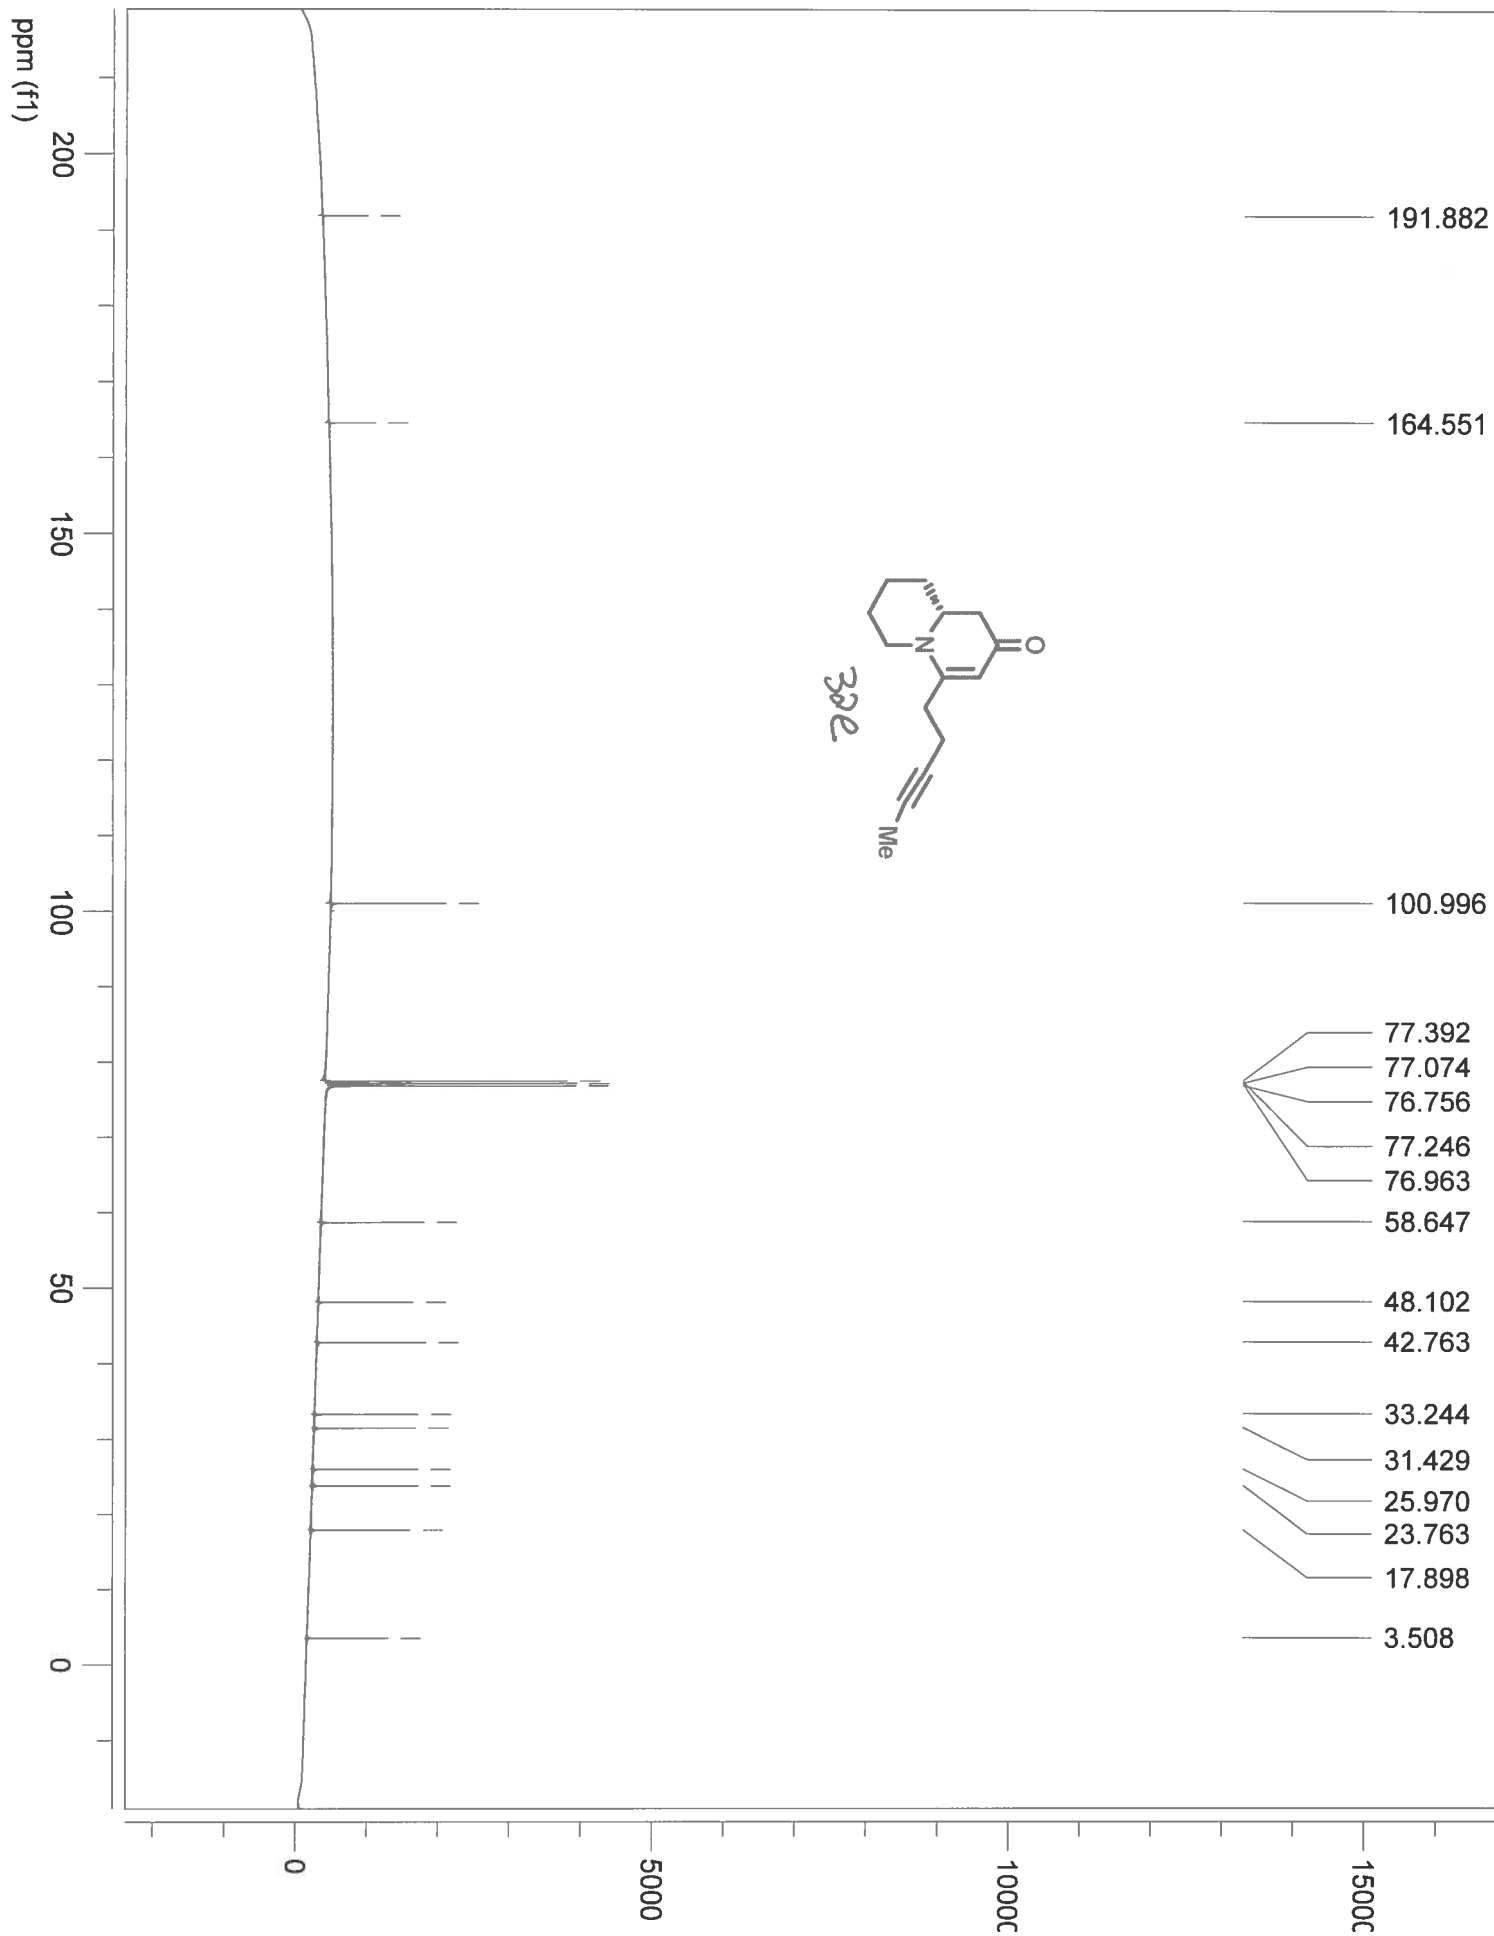

Supplement: c4ra14418j1.pdf [file c4ra14418j1.pdf]
